# Supplementary material for: The longitudinal prevalence of MRSA in care home residents and the effectiveness of improving infection prevention knowledge and practice on colonisation using a stepped wedge study design
Source: PubMed Central journal article supplement — BMJ Open. 2012 Jan 12;2(1):e000423. doi: 10.1136/bmjopen-2011-000423 (PMC3278489; doi:10.1136/bmjopen-2011-000423), 2012-01-12
Supplement: bmjopen-2011-000423.draft_revisions.pdf [file bmjopen-2011-000423.draft_revisions.pdf]

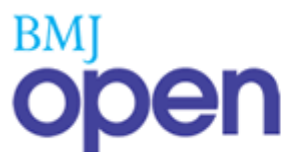

**The longitudinal prevalence of MRSA in care home residents and the effectiveness of improving infection prevention knowledge and practice on colonisation using a stepped wedge study design**

|                                 |                                                                                                                                                                                                                                                                                                                                                                                                                        |
|---------------------------------|------------------------------------------------------------------------------------------------------------------------------------------------------------------------------------------------------------------------------------------------------------------------------------------------------------------------------------------------------------------------------------------------------------------------|
| Journal:                        | <i>BMJ Open</i>                                                                                                                                                                                                                                                                                                                                                                                                        |
| Manuscript ID:                  | bmjopen-2011-000423                                                                                                                                                                                                                                                                                                                                                                                                    |
| Article Type:                   | Research                                                                                                                                                                                                                                                                                                                                                                                                               |
| Date Submitted by the Author:   | 05-Oct-2011                                                                                                                                                                                                                                                                                                                                                                                                            |
| Complete List of Authors:       | Horner, Carolyne; Leeds Teaching Hospitals NHS Trust, Microbiology<br>Wilcox, Mark; Leeds Teaching Hospitals NHS Trust, Microbiology<br>Barr, Ben; University of Liverpool, Division of Public Health<br>Hall, David; NHS Leeds<br>Hodgson, Gillian; Leeds Teaching Hospitals NHS Trust, Microbiology<br>Parnell, Peter; Leeds Teaching Hospitals NHS Trust, Microbiology<br>Tompkins, David; Health Protection Agency |
| <b>Primary Subject Heading</b>: | Health services research                                                                                                                                                                                                                                                                                                                                                                                               |
| Secondary Subject Heading:      | Public health                                                                                                                                                                                                                                                                                                                                                                                                          |
| Keywords:                       | carriage, transmission, intervention                                                                                                                                                                                                                                                                                                                                                                                   |
|                                 |                                                                                                                                                                                                                                                                                                                                                                                                                        |

SCHOLARONE™  
Manuscripts

only

## ORION Checklist of items to include when reporting an outbreak or intervention study of a nosocomial organism

|                                        | Item Number | Descriptor                                                                                                                                                                                                                                                                                                                                                                                                                                                                                                                                                                                                                                                                                                                               |
|----------------------------------------|-------------|------------------------------------------------------------------------------------------------------------------------------------------------------------------------------------------------------------------------------------------------------------------------------------------------------------------------------------------------------------------------------------------------------------------------------------------------------------------------------------------------------------------------------------------------------------------------------------------------------------------------------------------------------------------------------------------------------------------------------------------|
| <b>Title &amp; Abstract</b>            | 1           | Description of paper as outbreak report or intervention study.<br>Design of intervention study (eg Randomised Controlled Trial , Cluster Randomised Controlled Trial, Interrupted Time Series, Cohort study etc).<br>Brief description of intervention and main outcomes. - DONE                                                                                                                                                                                                                                                                                                                                                                                                                                                         |
| <b>Introduction Background</b>         | 2           | Scientific and/or local clinical background and rationale.<br>Description of organism as epidemic, endemic or epidemic becoming endemic. - DONE                                                                                                                                                                                                                                                                                                                                                                                                                                                                                                                                                                                          |
| Type of paper                          | 3           | Description of paper as Intervention study or an Outbreak Report.<br>If an outbreak report, report the number of outbreaks. - DONE                                                                                                                                                                                                                                                                                                                                                                                                                                                                                                                                                                                                       |
| Dates                                  | 4           | Start and finish dates of the study or report. - DONE                                                                                                                                                                                                                                                                                                                                                                                                                                                                                                                                                                                                                                                                                    |
| Objectives                             | 5           | Objectives for outbreak reports. Hypotheses for intervention studies - DONE                                                                                                                                                                                                                                                                                                                                                                                                                                                                                                                                                                                                                                                              |
| <b>Methods Design</b>                  | 6           | Study design. Use of EPOC classification recommended (RCT or CRCT, CBA, or ITS) - STEP WEDGE DESIGN<br>Whether study was retrospective, prospective or ambidirectional.<br>Whether decision to report or intervene was prompted by any outcome data.<br>Whether study was formally implemented with predefined protocol and endpoints.                                                                                                                                                                                                                                                                                                                                                                                                   |
| Participants                           | 7           | Number of patients admitted in study or outbreak. Summaries of distributions of age and lengths of stays. If possible, proportion admitted from other wards, hospitals, nursing homes or from abroad. Where relevant, potential risk factors for acquiring the organism. Eligibility criteria for study. Case definitions for outbreak report. -DONE                                                                                                                                                                                                                                                                                                                                                                                     |
| Setting                                | 8           | Description of the unit, ward or hospital and, if a hospital, the units included.<br>Number of beds, the presence and staffing levels of an infection control team. - DONE                                                                                                                                                                                                                                                                                                                                                                                                                                                                                                                                                               |
| Interventions                          | 9           | Definition of phases by major change in specific infection control practice (with start and stop dates). A summary table is strongly recommended with precise details of interventions, how and when administered in each phase. - DONE                                                                                                                                                                                                                                                                                                                                                                                                                                                                                                  |
| Culturing & Typing                     | 10          | Details of culture media, use of selective antibiotics and local and /or reference typing. Where relevant, details of environmental sampling. - DONE                                                                                                                                                                                                                                                                                                                                                                                                                                                                                                                                                                                     |
| Infection-related outcomes             | 11          | Clearly defined primary and secondary outcomes (eg incidence of infection, colonisation , bacteraemia) at regular time intervals (eg daily, weekly, monthly) rather than as totals for each phase, with at least three data points per phase and, for many two phase studies, 12 or more monthly data points per phase. Denominators (eg numbers admissions or discharges, patient bed days). If possible, prevalence of organism and incidence of colonisation on admission at same time intervals. Criteria for infection, colonisation on admission and directly attributable mortality.<br>For short studies or outbreak reports, use of charts with duration patient stay & dates organism detected may be useful (see text) - DONE |
| Economic outcomes                      | 12          | If a formal economic study done, definition of outcomes to be reported, description of resources used in interventions, with costs broken down to basic units, stating important assumptions.- NOT APPLICABLE                                                                                                                                                                                                                                                                                                                                                                                                                                                                                                                            |
| Potential Threats to internal validity | 13          | Which potential confounders were considered, recorded or adjusted for (eg: changes in length of stay, case mix, bed occupancy, staffing levels, hand-hygiene compliance, antibiotic use, strain type, processing of isolates, seasonality).<br>Description of measures to avoid bias including blinding & standardisation of outcome assessment & provision of care. - DONE                                                                                                                                                                                                                                                                                                                                                              |
| Sample size                            | 14          | Details of power calculations, where appropriate - ARE AVAILABLE IF REQUIRED                                                                                                                                                                                                                                                                                                                                                                                                                                                                                                                                                                                                                                                             |
| Statistical methods                    | 15          | Description of statistical methods to compare groups or phases. Methods for any subgroup or adjusted analyses, distinguishing between planned and unplanned (exploratory) analysis. Unless outcomes are independent, statistical approaches able to account for dependencies in the outcome data should be used, adjusting, where necessary, for potential confounders. - DONE<br>For outbreak reports statistical analysis may be inappropriate.                                                                                                                                                                                                                                                                                        |
| <b>Results Recruitment</b>             | 16          | For relevant designs the dates defining periods of recruitment and follow-up. A flow diagram is recommended to describe participant flow in each stage of study. - NOT APPLICABLE                                                                                                                                                                                                                                                                                                                                                                                                                                                                                                                                                        |
| Outcomes & estimation                  | 17          | For the main outcomes, the estimated effect size and its precision (usually using confidence intervals). A graphical summary of the outcome data is often appropriate for dependent data (such as most time series). - DONE                                                                                                                                                                                                                                                                                                                                                                                                                                                                                                              |
| Ancillary analyses                     | 18          | Any subgroup analyses should be reported and it should be stated whether or not it was planned (specified in the protocol) and possible confounders adjusted for - DONE                                                                                                                                                                                                                                                                                                                                                                                                                                                                                                                                                                  |
| Adverse events                         | 19          | Pre-specified categories of adverse events and occurrences of these in each intervention group . This might include drug side effects, crude or disease specific mortality in antibiotic policy studies or opportunity costs in isolation studies. - NOT APPLICABLE                                                                                                                                                                                                                                                                                                                                                                                                                                                                      |
| <b>Discussion Interpretation</b>       | 20          | For intervention studies an assessment of evidence for/against hypotheses, accounting for potential threats to validity of inference including regression to mean effects and reporting bias.<br>For outbreak reports, consider clinical significance of observations and hypotheses generated to explain them. - NOT APPLICABLE                                                                                                                                                                                                                                                                                                                                                                                                         |
| Generalisability                       | 21          | External validity of the findings of the intervention study i.e. to what degree can results be expected to generalise to different target populations or settings. - DONE                                                                                                                                                                                                                                                                                                                                                                                                                                                                                                                                                                |
| Overall evidence                       | 22          | General interpretation of results in context of current evidence. - DONE                                                                                                                                                                                                                                                                                                                                                                                                                                                                                                                                                                                                                                                                 |

**Abbreviations:** RCT: randomised controlled trial CRCT : Cluster Randomised Controlled Trial CBA: controlled before and after study ITS: interrupted time series

For peer review only

1  
2  
3  
4  
5  
6  
7  
8  
9  
10  
11  
12  
13  
14  
15  
16  
17  
18  
19  
20  
21  
22  
23  
24  
25  
26  
27  
28  
29  
30  
31  
32  
33  
34  
35  
36  
37  
38  
39  
40  
41  
42  
43  
44  
45  
46  
47

1  
2  
3  
4  
5 1 **The longitudinal prevalence of MRSA in care home residents and the**  
6  
7 2 **effectiveness of improving infection prevention knowledge and practice**  
8  
9 3 **on colonisation using a stepped wedge study design**

10  
11  
12 4 **C Horner, M Wilcox, B Barr, D Hall, G Hodgson, P Parnell, & D Tompkins**

13  
14  
15 5 C Horner Clinical Scientist Leeds Teaching Hospitals NHS Trust, Department of  
16  
17 6 Microbiology, Old Medical School, Leeds General Infirmary, Leeds, LS1 3EX

18  
19  
20 7 M Wilcox Consultant/Clinical Director of Microbiology/Pathology, Leeds Teaching  
21  
22 8 Hospitals NHS Trust, Department of Microbiology, Old Medical School, Leeds General  
23  
24 9 Infirmary, Leeds, LS1 3EX

25  
26  
27 10 B Barr Specialty Registrar in Public Health, University of Liverpool, Division of Public  
28  
29 11 Health, Whelan Building, Quadrangle, Liverpool, L69 3GB

30  
31  
32 12 D Hall Infection Prevention and Control Nurse NHS Leeds, Sycamore Lodge, 7a  
33  
34 13 Woodhouse Cliff, Leeds, LS6 2HF

35  
36  
37 14 G Hodgson Nurse Consultant Leeds Teaching Hospitals NHS Trust, Infection  
38  
39 15 Prevention and Control, Leeds General Infirmary, Leeds, LS1 3EX

40  
41  
42 16 P Parnell Senior Biomedical Scientist Department of Microbiology, Old Medical School,  
43  
44 17 Leeds General Infirmary, Leeds, LS1 3EX

45  
46  
47 18 D Tompkins Former Regional Microbiologist HPA Yorkshire and the Humber, Bridle  
48  
49 19 Path, York Road, Leeds, LS15 7TR

50  
51 20 Corresponding author and address for reprints: Mark.wilcox@leedsth.nhs.uk.

52  
53 21 **Word count:** 5220. The manuscript contains four tables (Tables 1-4) and one figure  
54  
55 22 (Figure 1).  
56  
57  
58  
59  
60

## 1 Copyright/licence for publication

2 The Corresponding Author has the right to grant on behalf of all authors and does grant  
3 on behalf of all authors, an exclusive licence (or non exclusive for government  
4 employees) on a worldwide basis to the BMJ Publishing Group Ltd and its licensees ,  
5 to permit this article (if accepted) to be published in BMJ editions and any other  
6 BMJPG products and to exploit all subsidiary rights, as set out in our licence  
7 (<http://resources.bmj.com/bmj/authors/checklists-forms/licence-for-publication>).

## 8 Competing interest declaration

9 All authors have completed the ICMJE uniform disclosure form at  
10 [www.icmje.org/coi\\_disclosure.pdf](http://www.icmje.org/coi_disclosure.pdf) (available on request from the corresponding author)  
11 and declare: no support from any organisation for the submitted work; no financial  
12 relationships with any organisations that might have an interest in the submitted work in  
13 the previous three years; no other financial or non-financial relationships or interests  
14 that that may be relevant to the submitted work.

## 15 Acknowledgements

16 The authors thank the residents and staff of all the participating care homes, the  
17 Infection Control Nurses at North East Leeds PCT, Richard Dixon (Information  
18 Manager at Leeds Primary Care Trust), Warren Fawley and the Infection Control  
19 laboratory staff at the Leeds Teaching Hospitals NHS Trust, James Riach for  
20 assistance with data entry, and Dr John Heritage (University of Leeds) for advice and  
21 assistance in writing this manuscript.

## 22 Contributors

23 MW was the lead investigator and obtained funding for the study. All authors were  
24 involved in the study design and reviewed the draft of this report. CH coordinated the  
25 data management and drafted this report. GH and DT were integral to the setting up  
26 and management of the study. BB carried out the statistical analysis. PP was

1  
2  
3  
4  
5  
6  
7  
8  
9  
10  
11  
12  
13  
14  
15  
16  
17  
18  
19  
20  
21  
22  
23  
24  
25  
26  
27  
28  
29  
30  
31  
32  
33  
34  
35  
36  
37  
38  
39  
40  
41  
42  
43  
44  
45  
46  
47  
48  
49  
50  
51  
52  
53  
54  
55  
56  
57  
58  
59  
60

1 responsible for laboratory protocol development. DH carried out the data collection  
2 and the sampling of residents with assistance from other Infection Control Nurses,  
3 North East Leeds PCT. MW is the guarantor of the study.

#### 4 **Funding**

5 This is an independent report commissioned and funded by the Policy Research  
6 Programme in the Department of Health. The views expressed are not necessarily  
7 those of the Department.

#### 8 **Ethics approval**

9 The study received approval from the East Leeds Research Ethics Committee: MREC  
10 reference number 06/Q1206/162.

## 1 Article Summary

### 2 1) Article Focus

3 To assess the effectiveness of an educational intervention on the prevalence of MRSA  
4 in care homes for the elderly.

### 5 2) Key messages

- 6 • There was a high rate of MRSA colonisation in elderly residents of care homes  
7 during the study period.
- 8 • The intervention improved the infection prevention knowledge and practice of  
9 staff working in care homes, but did not reduce the prevalence of MRSA  
10 colonisation of residents.
- 11 • Additional measures are required to reduce endemic MRSA colonisation in care  
12 homes.

### 13 3) Strengths and limitations of this study

- 14 • This is a large prospective study, including 65 homes and 2492 residents.  
15 MRSA prevalence was monitored over a 28 month period.
- 16 • The intervention was plausible, unlikely to be harmful and the assessments of  
17 the intervention were reasonable.
- 18 • A significant improvement was seen in scores for all three intervention  
19 assessment methods; however, the intervention was associated with a small  
20 but significant increase in MRSA prevalence.
- 21 • It was not possible to identify or control for the factors responsible for the  
22 increase in MRSA prevalence following the intervention.

1  
2  
3  
4 **Abstract (249 words)**  
5

6  
7 **Objectives:** To determine the prevalence and health outcomes of meticillin-resistant  
8  
9 *Staphylococcus aureus* (MRSA) colonisation in elderly care home residents. To  
10  
11 measure the effectiveness of improving infection prevention knowledge and practice on  
12  
13 MRSA prevalence.  
14

15  
16 **Setting:** Care homes, with and without nursing capability, for elderly residents in  
17  
18 Leeds, UK.  
19

20  
21 **Participants:** Residents able to give informed consent.  
22

23  
24 **Design:** A controlled before and after intervention study, using a stepped-wedge  
25  
26 design, in three groups totalling 65 care homes. Baseline MRSA prevalence was  
27  
28 determined by screening the nares of residents (n = 2492). An intervention based  
29  
30 upon staff education and training on hand hygiene was delivered at three different  
31  
32 times according to group number. Scores for an audit of hand hygiene facilities, staff  
33  
34 hand hygiene observations, and an educational questionnaire were collected before  
35  
36 and after the intervention. After each group of homes received the intervention, all  
37  
38 participants were screened for MRSA nasal colonisation.  
39  
40

41  
42 **Results:** MRSA prevalence was 20%, 19%, 22% and 21% in each survey,  
43  
44 respectively. There was a significant improvement in scores for all three assessment  
45  
46 methods ( $p \leq 0.001$ ) post-intervention. The intervention was associated with a small  
47  
48 but significant increase in MRSA prevalence ( $p = 0.023$ ). MRSA colonisation was  
49  
50 associated with previous and subsequent MRSA infection, but was not significantly  
51  
52 associated with subsequent hospitalisation or mortality.  
53  
54

55  
56 **Conclusions:** An intervention based on staff education and training did not result in a  
57  
58 decrease in the prevalence of MRSA colonisation in care home residents. Additional  
59  
60 measures will be required by reduce endemic MRSA colonisation in care homes.



1  
2  
3  
4  
5  
6  
7  
8  
9  
10  
11  
12  
13  
14  
15  
16  
17  
18  
19  
20  
21  
22  
23  
24  
25  
26  
27  
28  
29  
30  
31  
32  
33  
34  
35  
36  
37  
38  
39  
40  
41  
42  
43  
44  
45  
46  
47  
48  
49  
50  
51  
52  
53  
54  
55  
56  
57  
58  
59  
60

1 **What is already known on this subject?**

2 Residents of care homes are at risk of MRSA colonisation. The assessment of health  
3 outcomes of residents colonised with MRSA is not commonly reported. Robust data  
4 referring to strategies for preventing MRSA transmission in care homes are lacking and  
5 studies are needed to test infection prevention interventions that are deliverable in the  
6 care home setting.

7 **What this study adds**

8 There is a large reservoir of MRSA in care homes. MRSA colonisation is associated  
9 with previous and subsequent MRSA infection in residents of care homes; however,  
10 MRSA colonisation was not significantly associated with subsequent hospitalisation or  
11 mortality. The intervention improved staff education and hand hygiene (compliance  
12 and facility provision), but did not result in a decrease in prevalence of MRSA  
13 colonisation. Staff education and training alone cannot be expected to reduce levels of  
14 MRSA colonisation in the care home residents.

## 1 Introduction

2           Meticillin-resistant *Staphylococcus aureus* is a significant cause of mortality and  
3 morbidity in both healthcare and community settings.<sup>1;2</sup> Numerous surveillance  
4 schemes,<sup>3;4</sup> recommendations,<sup>5;6</sup> and guidelines<sup>7;8</sup> have been developed with the aim  
5 of reducing levels of MRSA infection associated with healthcare. In the UK, mandatory  
6 surveillance of cases of MRSA bacteraemia was introduced in all acute NHS Trusts in  
7 England in 2001.<sup>3</sup> Recently, levels of MRSA bacteraemia in hospitals have been  
8 decreasing markedly.<sup>9</sup>

9           The elderly population living in care homes often require frequent contact with  
10 healthcare. This situation, known as the 'revolving door' syndrome,<sup>10</sup> when residents  
11 are admitted to hospital and then discharged back into a care home, means that care  
12 home residents are likely to be carriers of MRSA. Small studies in the UK during the  
13 1990s identified levels of MRSA colonisation in care home residents between  
14 0.8-17%.<sup>11-13</sup> More recently, our group<sup>14</sup> and Baldwin *et al.* (2009) reported that MRSA  
15 colonisation levels among residents in care homes in the UK were greater than 20%.<sup>15</sup>  
16 MRSA prevalence rates of greater than 36% have been reported in long-term care  
17 facilities in France and the USA.<sup>16;17</sup> There is a paucity of large-scale, longitudinal  
18 studies monitoring the occurrence of MRSA in the care home setting<sup>14;15</sup> and the  
19 assessment of health outcomes of residents colonised with MRSA are not commonly  
20 reported.

21           Guidance for infection control in care homes was issued by the Department of  
22 Health in 2006.<sup>8</sup> These guidelines comprised recommendations rather than statutory  
23 requirements, and were not specific for the control of MRSA. In a recent Care Quality  
24 Commission survey, however, 25% of participating care homes were not using the  
25 Department of Health guidance,<sup>8</sup> including specific requirements that all staff should  
26 receive training in infection prevention and control.<sup>10</sup> Most evidence for the

1 effectiveness of infection control strategies has been generated in the acute healthcare  
2 setting.<sup>7;18</sup> Although some infection prevention recommendations designed for acute  
3 healthcare may be applicable to other settings,<sup>7</sup> successful translation to the care home  
4 environment cannot be assumed.<sup>10</sup> During compilation of a Cochrane review of  
5 infection control strategies for preventing MRSA transmission in nursing homes, no  
6 studies met the systematic selection criteria.<sup>18</sup> Robust data referring to strategies for  
7 preventing MRSA transmission in care homes are lacking, and studies are needed to  
8 test infection prevention interventions that are deliverable in the care home setting.<sup>18</sup>

9         The objectives of this study were to determine prospectively the prevalence and  
10 risk factors for MRSA colonisation in a large sample of elderly residents of care homes  
11 in Leeds Primary Care Trust (PCT), and to determine whether training and education of  
12 care home staff in the area of infection prevention, in particular hand hygiene, can  
13 minimise the risk of MRSA transmission. Health outcomes (rates of subsequent  
14 hospitalisation, infection and mortality) of residents according to MRSA colonisation  
15 were also examined.

## 1 **Methods**

### 2 **Setting**

3           According to the Care Standards Act (2000), a care home is defined as 'any  
4 home that provides accommodation, together with nursing or personal care, for any  
5 person who is, or has been ill, or is disabled or infirm'.<sup>19</sup> In the UK, all homes that meet  
6 the definition of a care home are registered with the Care Quality Commission, formerly  
7 known as the Commission for Social Care Inspection.<sup>20</sup> Care homes may be owned by  
8 the local authority or by independent providers. All care homes, with 20 or more beds,  
9 registered in Leeds, UK were eligible to take part in the study, excluding those that  
10 provided care for people with mental, physical or learning disabilities. Ninety of the 186  
11 registered care homes met the study criteria and were invited to participate. Leeds  
12 Teaching Hospitals Trust (LTHT) was the main acute care provider for all the care  
13 homes included in the study.

### 14 **Data collection**

15           Each participating care home was given a unique identifying number and was  
16 anonymised to laboratory staff. Details such as home owner, number of beds, and  
17 whether or not a home had nursing capability were recorded for each home. Each  
18 resident who was considered to be eligible to participate by the care home staff was  
19 verbally given information about the nature of the study. In the first instance, written  
20 consent was obtained, followed by verbal consent if the resident agreed to participate  
21 in subsequent surveys. The sampling process was anonymised, with no specific  
22 infection prevention interventions being initiated on the identification of a resident who  
23 was colonised. At each survey the total number of residents present in the home and  
24 the number of residents able to consent was collected by age and sex category. Data  
25 pertaining to the age, sex and presence of an invasive device were collected per  
26 participant, per survey.

1           Once the collection of swabs had been completed, further data were collected.  
2           The Microbiology Laboratory Information Management System (LIMS) was used to  
3           determine whether each resident had a record of clinical samples being sent for  
4           microbiological investigation and whether or not MRSA had been isolated before or  
5           after each survey. For the purposes of this study, MRSA infection was defined as a  
6           record of MRSA isolated from any invasive sample type (*i.e.* blood culture, tissue,  
7           bone, bronchoalveolar lavage) or MRSA isolated as pure culture from a non-invasive  
8           sample type (*i.e.* swab, sputum, urine). MRSA colonisation was defined as a record of  
9           MRSA isolated from a urine sample collected via a catheter, or MRSA isolated from a  
10          non-invasive sample type in the presence of other bacteria. Data regarding contact  
11          with healthcare facilities were collected using the Patient Administration System (PAS)  
12          for LTHT. This included the total number of hospital days spent in LTHT during the 12  
13          months before a screening swab was collected, and the number of hospital admissions  
14          prior to this period. Any attendance at out-patient clinics was also recorded. All-cause  
15          mortality data were collected both from PAS and from a database held by Leeds  
16          Primary Care Trust.

### 17          **Study design**

18          This study was a controlled before and after intervention study and followed a  
19          stepped-wedge design (Table 1).<sup>21</sup> After an initial MRSA prevalence survey, care  
20          homes were randomly allocated into three groups. Random allocation was stratified by  
21          number of beds and baseline MRSA prevalence. Implementation of staff training and  
22          education intervention was dependent on the group to which the home had been  
23          allocated. Homes in Group One received the intervention between January-October  
24          2007; homes in Group Two between November 2007-February 2008; and homes in  
25          Group Three between July-September 2008. Scores for audits of hand hygiene

1 facilities, staff hand hygiene observations, and an educational questionnaire were  
 2 collected before and after the intervention.

3 **Table 1. Intervention schedules for stepped wedge design; “0” represents a**  
 4 **pre-intervention survey, “1” represents surveys occurring post-intervention.**

| Group | Survey/Period of Collection |              |              |              |
|-------|-----------------------------|--------------|--------------|--------------|
|       | 1                           | 2            | 3            | 4            |
|       | Nov-Dec 2006                | Oct-Nov 2007 | May-Jun 2008 | Jan-Feb 2009 |
| 1     | 0                           | 1            | 1            | 1            |
| 2     | 0                           | 0            | 1            | 1            |
| 3     | 0                           | 0            | 0            | 1            |

### 5 **Intervention**

6 An intervention based on staff training and education on the topic of infection  
 7 prevention and effective hand hygiene was used to assess the effect on MRSA  
 8 prevalence. The intervention consisted of a structured session of education, combined  
 9 with two audits that assessed hand hygiene practice and facilities in the care home.  
 10 Scores for the educational questionnaire and for audit of hand hygiene facilities and  
 11 staff hand hygiene observations were collected before and after the training session.  
 12 Written feedback concerning the results of the audits that took place before the training  
 13 session was returned to each home. Specific suggestions for improvement were  
 14 included when necessary.

15 The education session, lead by an Infection Control Nurse employed by Leeds  
 16 PCT, lasted approximately 45 minutes, and was delivered using a Microsoft Office

1 PowerPoint presentation with strictly controlled content. Topics included how and  
2 when to wash hands and barriers to effective hand washing. The use of alcohol gel  
3 and personal protective equipment were also included. A DVD outlining correct hand  
4 hygiene procedures was shown during the training. Attendees participated in a  
5 practical demonstration of good hand hygiene technique by using hand cream  
6 containing ultra-violet responsive particles and a UV light box. A questionnaire  
7 comprising 12 short answer questions was completed, directly before (pre-) and after  
8 (post-) the educational session, by personnel who attended the training. Approximately  
9 four weeks after the training was completed, three members of staff were chosen at  
10 random to complete the same questionnaire; this is referred to as the extended-time  
11 questionnaire. The same materials and session format were used for all intervention  
12 groups. The study aimed to deliver the educational input to at least 80% of the  
13 whole-time equivalent (WTE) staff.

14 An audit of the hand hygiene practice and facilities was carried out for each  
15 home at the beginning of the relevant intervention period, using an audit tool from the  
16 Infection Control Nurses Association.<sup>22</sup> Issues such as staff education, compliance  
17 with requirements relating to uniform policy, and provision of liquid soap and paper  
18 towels were assessed. The same audit was carried out after written feedback had  
19 been given to the home. The Lewisham hand hygiene assessment tool<sup>23</sup> was used to  
20 perform observational audits of hand hygiene practice before and, a minimum of four  
21 weeks, after the educational input for each intervention group. During each of these  
22 audits, three care home staff members, selected at random, were shadowed for a  
23 period of 20 minutes each. A comparison between the number of times hand  
24 decontamination occurred *versus* the number of hand washing opportunities arising  
25 was determined to give a percentage figure for compliance.

## 26 **Statistical analysis**

1  
2  
3  
4  
5 1 Statistical analysis was carried out using Stata data analysis and statistical  
6  
7 2 software (StataCorp, Texas, USA). Chi-squared tests were used to compare resident  
8  
9 3 and care home characteristics. Descriptive statistics were used to compare home  
10  
11 4 characteristics between the three groups into which homes were allocated and to  
12  
13 5 compare those homes participating in the study to those not consenting to take part.  
14  
15 6 Chi-squared tests were used to compare proportions, t-tests for comparing continuous  
16  
17 7 variables between two groups and ANOVA for comparing continuous data between  
18  
19 8 more than two groups. Analytical approaches used in stepped-wedge designs are  
20  
21 9 susceptible to separate time trends within subgroups;<sup>21</sup> therefore, the presence of a  
22  
23 10 significant time trend within subgroups of care homes and residents was investigated.  
24  
25 11 The impact of the intervention was then investigated using a random effects logistic  
26  
27 12 regression model controlling for resident characteristics and subgroup by time trend  
28  
29 13 interactions. A  $\chi^2$  test was used to compared hand hygiene proportions and a t-test to  
30  
31 14 compare educational scores. Scores from the audit of hand hygiene facilities were not  
32  
33 15 normally distributed and a Wilcoxon signed rank test was used for comparison. To  
34  
35 16 investigate whether being identified with an infection was associated with prior MRSA  
36  
37 17 carriage, survival analysis was performed using a Cox proportional hazards model.  
38  
39 18 Residents that had a record of an MRSA infection prior to entering the study were  
40  
41 19 excluded from this analysis. The analysis investigated the time from the resident  
42  
43 20 entering the survey to the time of identification of an MRSA infection or until the  
44  
45 21 09/08/2009. A random effects logistic regression model was used to assess whether  
46  
47 22 mortality was associated with prior MRSA carriage. For all analyses, statistical  
48  
49 23 significance was defined as  $p < 0.05$ .

#### 24 **Microbiological methods**

25 Amies' Transport swabs (Barloworld Scientific, Stone, Staffordshire, UK) were  
26 used to sample the anterior nares of consenting residents during four periods:



1 16<sup>th</sup> November 2006-13<sup>th</sup> December 2006 (Survey One); 1<sup>st</sup> October  
2 2007-12<sup>th</sup> November 2007 (Survey Two); 1<sup>st</sup> May 2008-26<sup>th</sup> June 2008 (Survey Three)  
3 and 5<sup>th</sup> January-12<sup>th</sup> February 2009 (Survey Four). Each swab was used to inoculate a  
4 single MRSA Select agar plate (Bio-Rad, Marnes la Coquette, France), which was  
5 incubated for 18-24 hours at 37°C. Bright, fuchsia–pink colonies were considered  
6 presumptive MRSA. Presumptive MRSA colonies were confirmed to be *S. aureus* by  
7 DNase agar testing and positive agglutination reaction using the Pastorex™ Staph plus  
8 kit (Bio-Rad, Marnes la Coquette, France). Meticillin resistance was confirmed by  
9 breakpoint susceptibility testing using Iso-Sensitest agar (Oxoid, Basingstoke,  
10 Hampshire, UK) supplemented with 4 mg/L, 8 mg/L and 12 mg/L methicillin,  
11 respectively (Medical Wire and Equipment Co. Ltd., Corsham, Wiltshire, UK) or 4 mg/L  
12 cefoxitin (Mast Diagnostics, Bootle, Merseyside, UK). Isolates that had an equivocal  
13 meticillin susceptibility result by breakpoint method were analysed further using the  
14 Mastalex™ MRSA kit (MAST Diagnostics, Bootle, Merseyside, UK).  
15 Meticillin-susceptible *S. aureus* strain NCTC 6571 and MRSA strain NCTC 10442 were  
16 used as control organisms.

## 1 Results

### 2 Participating Care Homes

3 Of the 90 homes that were invited, 68 homes participated in the first part of the  
 4 study. There was no significant difference in the homes taking part and those that  
 5 refused in terms of the number of residents ( $p = 0.15$ , t-test), the proportion with  
 6 nursing capability ( $p = 0.62$ ,  $\chi^2$ ) or the proportion that were owned by the local authority  
 7 ( $p = 0.18$ ,  $\chi^2$ ). After the initial survey, the 68 homes that participated were randomly  
 8 allocated into three groups. The number of homes that were in each group and their  
 9 characteristics are shown in Table 2.

10 **Table 2. Home characteristics according to Intervention Group.**

|                                    | Group |    |    |
|------------------------------------|-------|----|----|
|                                    | 1     | 2  | 3  |
| Total Homes (n)                    | 28    | 18 | 22 |
| Mean number of places per home (n) | 44    | 39 | 42 |
| Homes with nursing capability (n)  | 14    | 8  | 10 |
| Local authority homes (n)          | 8     | 1  | 6  |

11 There was no significant difference between homes allocated to different  
 12 intervention groups with respect to the number of homes that provided nursing care  
 13 ( $p = 0.9$ ,  $\chi^2$ ), the mean number of beds per home ( $p = 0.6$ , ANOVA), and the owner of  
 14 the home ( $p = 0.12$ ,  $\chi^2$ ). There were no significant differences in mean age ( $p = 0.9$ ,  
 15 ANOVA), sex distribution ( $p = 0.4$ ,  $\chi^2$ ) or overall number of residents ( $p = 0.43$ , t-test)  
 16 between the three intervention groups; however, there were fewer residents in homes

1 owned by the local authority in Group Two. Following the first survey, two homes  
2 withdrew from the study leaving 66 homes in the second survey. A further home  
3 withdrew following Survey Two leaving 65 homes in Surveys Three and Four. The  
4 following analyses report data from those homes that participated in all four surveys.

5 The 65 homes that participated in all four surveys had 2772 beds. Fourteen  
6 homes were operated by the local authority, none of which had nursing capability  
7 (n = 463 beds; range 20-40; mean 33). Fifty one homes were owned by independent  
8 providers (n = 2309 beds; range 20-180; mean 44); 31 homes (n = 1648 beds) had  
9 nursing capability. Homes with nursing capability comprised 48% (n = 30) of the  
10 homes in this study and housed 59% (n = 1621) of the beds.

### 11 **Participating residents and swabs collected**

12 In total, 4327 swabs were collected; 1210 from Survey One, 1067 from Survey  
13 Two, 1023 from Survey Three and 1027 from Survey Four. Two swabs were removed  
14 from Survey Four due to participant duplication (n = 1) and incomplete data, leaving  
15 4325 swabs suitable for analysis. The number of swabs collected from individual care  
16 homes during any survey ranged from 5-93. On average, 46% of residents that were  
17 present in homes at the time of a survey were swabbed (*i.e.* able to provide consent  
18 and available for swabbing).

19 The study included 2492 residents. The majority (n = 1405, 56%) of residents  
20 participated in a single survey, 550 (22%) participated in two surveys, 328 (13%) in  
21 three surveys and 209 (8%) participated in all four surveys. The majority (n = 1404) of  
22 residents had been admitted to hospital within the 12 months before being included in  
23 the study. Of those that did not have a record of hospital admission within 12 months  
24 of being sampled, 664 had a record of previous hospital admission according to LTHT  
25 PAS. There were 424 (17%) residents that had no record of hospital admission to  
26 LTHT; however 154 of these had a record of contact with out-patient clinics. There

1 were 270 residents that did not have any record of contact with healthcare; of these,  
2 18% were found to be MRSA positive in at least one survey. The corresponding  
3 proportion for those who had had healthcare contact was 28% ( $p < 0.001$ ).

#### 4 **Staff knowledge and behaviour**

5       There were significant improvements in the mean scores for staff knowledge  
6 following the intervention; 71%, scores after education vs. 43% before education  
7 ( $p < 0.001$ , t-test). The mean knowledge score achieved at the extended-time  
8 questionnaire was 57% (vs. baseline  $p < 0.001$ , t-test). There were significant  
9 improvements in the mean scores following the intervention for the audit of hand  
10 hygiene facilities (85% post-intervention vs. 69% pre-intervention;  $p < 0.001$ , Wilcoxon  
11 signed rank test) and observations of hand hygiene (82% of 455 opportunities after the  
12 intervention vs. 58% of 568 opportunities before;  $p < 0.001$ ,  $\chi^2$  test).

#### 13 **MRSA colonisation**

14       A total of 888 swabs (21%) of anterior nares were MRSA positive; this  
15 comprised 238 participants in Survey One (20%); 204 in Survey Two (19%); 228 in  
16 Survey Three (22%), and 218 in Survey Four (21%). The prevalence of MRSA  
17 colonisation in residents within individual homes ranged from 0-60%. One home, a  
18 privately owned care home without nursing capability ( $n = 24$  beds), with 21  
19 participants, did not have any residents with nasal colonisation with MRSA identified in  
20 any of the four surveys. There was no significant difference in prevalence of MRSA  
21 between surveys ( $p = 0.28$ ,  $\chi^2$ ) and there was no significant trend in MRSA prevalence  
22 overall ( $p = 0.15$ , ANOVA) across the four surveys. When other factors were controlled  
23 for (age, sex, hospital admissions, invasive devices), however, a significant increase in  
24 MRSA colonisation across the four surveys was identified (OR = 1.08,  $p = 0.031$ ,  
25 logistic regression). In order to identify factors associated with the increasing trend,  
26 subgroup analyses (homes with nursing capability, privately owned homes or large

1 homes (>35 beds) were performed. The increase in MRSA prevalence remained  
2 significant in homes with nursing capability (OR = 1.61, 95% CI 1.15-2.26,  $p = 0.006$ ,  
3 logistic regression) and for residents in the >90 years age group (OR = 1.14,  $p = 0.044$ ,  
4 logistic regression). Both trends were taken into account during multivariate analysis.

5       Multivariate analysis of risk factors for MRSA colonisation in residents showed  
6 that the intervention was associated with a small but significant increase in prevalence  
7 of MRSA ( $p = 0.02$ , logistic regression) (Table 3). Overall, MRSA prevalence prior to  
8 the intervention was 18.6%, which increased to 22.4% after the intervention. When  
9 analysed according to Group, there was a significant difference between MRSA  
10 prevalence before and after the intervention in Groups Two ( $p = 0.04$ ,  $\chi^2$ ) and Three  
11 ( $p = 0.02$ ,  $\chi^2$ ) but not in Group One ( $p = 0.44$ ,  $\chi^2$ ) (Figure 1). The significant increase in  
12 prevalence occurred in the survey directly after the intervention but was not sustained  
13 in the group that had follow-up (Figure 1). The following factors were also significantly  
14 associated with MRSA colonisation: the number of hospital admissions in the last  
15 12 months, the total number of days a participant spent in hospital in the 12 months  
16 before sampling, male sex, and having a record of an MRSA infection prior to entering  
17 the study (Table 3).

18 To investigate the increase in MRSA prevalence occurring after the intervention, care  
19 homes with and without nursing capability were analysed separately with controls  
20 (Table 3). This analysis showed that the intervention was no longer associated with an  
21 increase in MRSA prevalence in homes with nursing capability ( $p = 0.159$ , logistic  
22 regression); however, in care homes without nursing capability the intervention  
23 remained significantly associated with an increase in MRSA prevalence ( $p = 0.034$ ,  
24 logistic regression). When the same analysis was performed only including  
25 participants who were present in at least two surveys ( $n = 1087$ ), the intervention  
26 remained associated with an increase in MRSA prevalence in both care homes with

- 1 nursing capability (OR = 2.07, 95% CI 1.22-3.52,  $p = 0.007$ , logistic regression) and
- 2 those without (OR = 2.55, 95% CI 1.3-4.97,  $p = 0.006$ , logistic regression).

For peer review only

1  
2  
3  
4  
5  
6  
7  
8  
9  
10  
11  
12  
13  
14  
15  
16  
17  
18  
19  
20  
21  
22  
23  
24  
25  
26  
27  
28  
29  
30  
31  
32  
33  
34  
35  
36  
37  
38  
39  
40  
41  
42  
43  
44  
45  
46  
47  
48  
49  
50  
51  
52  
53  
54  
55  
56  
57  
58  
59  
60

1 **Table 3. Logistic regression of risk factors for colonisation with meticillin-resistant *Staphylococcus aureus* (MRSA) among 2492**  
 2 **residents of care homes in Leeds, United Kingdom, according to care home capability**

| Risk factor                                          | Comparison group           | Overall |           |          | Care home                  |           |          |                         |           |          |
|------------------------------------------------------|----------------------------|---------|-----------|----------|----------------------------|-----------|----------|-------------------------|-----------|----------|
|                                                      |                            | OR      | CI        | <i>p</i> | Without nursing capability |           |          | With nursing capability |           |          |
|                                                      |                            | OR      | CI        | <i>p</i> | OR                         | CI        | <i>p</i> | OR                      | CI        | <i>p</i> |
| After intervention                                   | No intervention            | 1.36    | 1.04-1.79 | 0.02     | 1.61                       | 1.03-2.52 | 0.034    | 1.26                    | 0.91-1.75 | 0.159    |
| No. of hospital admissions in the last 12 months     | -                          | 1.18    | 1.11-1.26 | <0.001   | 1.23                       | 1.11-1.36 | <0.001   | 1.14                    | 1.05-1.24 | 0.001    |
| No. of hospital admission days in the last 12 months | -                          | 1.00    | 1.00-1.00 | 0.001    | 1.00                       | 1.00-1.01 | 0.046    | 1.00                    | 1.00-1.00 | 0.006    |
| Presence of an invasive device                       | Absence of invasive device | 2.36    | 1.70-3.29 | <0.001   | 1.81                       | 0.86-3.82 | 0.116    | 2.46                    | 1.70-3.56 | <0.001   |
| Record of MRSA infection prior to study              | No previous record         | 2.12    | 1.49-3.02 | <0.001   | 3.73                       | 1.78-7.82 | <0.001   | 1.78                    | 1.19-2.65 | 0.005    |
| Age 80-89 years                                      | <80 years                  | 1.13    | 0.92-1.39 | 0.24     | 1.14                       | 0.80-1.64 | 0.454    | 1.15                    | 0.90-1.48 | 0.246    |
| Age 90+ years                                        | <80 years                  | 1.29    | 0.94-1.78 | 0.11     | 1.54                       | 0.91-2.6  | 0.101    | 1.13                    | 0.75-1.7  | 0.537    |
| Male                                                 | Female                     | 1.48    | 1.24-1.78 | <0.001   | 1.37                       | 1.0-1.87  | 0.042    | 1.55                    | 1.25-1.93 | <0.001   |

3 Key: OR, odds ratio; CI, 95% confidence interval.

2 Residents were followed for a median 21 months to determine MRSA infection  
BMJ Open  
3 and survival outcomes. The length of follow-up varied significantly according to the  
4 survey in which the resident participated; residents in the first survey had a possible  
5 follow-up of 33 months compared with those in the last survey, who had possible  
6 follow-up of six months. Hospital admission data in the period 12 months after the date  
7 of colonisation were collected for residents that participated in Survey One (n = 1210).  
8 The relative risk for hospitalisation within 12 months of the date of colonisation was  
9 1.27 ( $p > 0.05$ ). Subsequent infection with MRSA was significantly associated with prior  
10 MRSA colonisation when other factors were controlled for (OR = 2.5, 95%  
11 CI = 1.2-5.24,  $p = 0.014$ , Cox proportional hazards model) (Table 4). Of the 2492  
12 residents included in the study, 90 residents were recorded as having an MRSA  
13 infection prior to entering the study, leaving 2442 suitable for further analysis. The  
14 majority (n = 1800) of residents were not colonised with MRSA and had no record of an  
15 MRSA infection. There were 612 residents who were colonised with MRSA but had no  
16 record of MRSA infection, 16 residents had no MRSA colonisation and had a  
17 subsequent record of an MRSA infection, and 14 residents were identified with  
18 colonisation and had subsequently developed an MRSA infection. Eight residents had  
19 a record of MRSA bacteraemia. Two percent of residents colonised with MRSA had a  
20 record of MRSA infection subsequent to a survey, compared with 0.9% for those  
21 residents without MRSA colonisation ( $p = 0.008$ ,  $\chi^2$ ). Death was recorded for 897 of  
22 the 2492 residents that participated. Colonisation with MRSA was not significantly  
23 associated with mortality (OR = 1.16, 95% CI 0.95-1.41,  $p = 1.32$ , logistic regression);  
24 however, mortality was significantly associated with advanced age, male sex, the  
25 presence of an invasive device, and the number of hospital admissions within 12



2 entering the study to either MRSA infection or 09/08/2009, whichever occurred  
 3 **BMJ Open**  
 3 first and b) logistic regression model of mortality associated with prior MRSA  
 4 carriage

| Risk factor                                          | MRSA infection <sup>a</sup> |           |          | Mortality <sup>b</sup> |           |          |
|------------------------------------------------------|-----------------------------|-----------|----------|------------------------|-----------|----------|
|                                                      | Hazard Ratio                | CI        | <i>p</i> | OR                     | CI        | <i>p</i> |
| MRSA colonisation during study                       | 2.51                        | 1.2-5.24  | 0.014    | 1.16                   | 0.95-1.41 | 0.132    |
| Age                                                  | 1.00                        | 0.96-1.05 | 0.728    | 1.04                   | 1.03-1.05 | <0.001   |
| Male                                                 | 1.41                        | 0.65-3.08 | 0.377    | 1.39                   | 1.14-1.69 | 0.001    |
| Presence of an invasive device                       | 0.67                        | 0.09-5.02 | 0.701    | 5.45                   | 3.32-8.95 | <0.001   |
| No. of hospital admissions in the previous 12 months | 1.11                        | 0.92-1.34 | 0.244    | 1.06                   | 1.00-1.12 | 0.038    |

5 Key: OR, Odds ratio; CI, 95% confidence interval.

## 1 Discussion

2 To our knowledge, this is the largest prospective study that has monitored the  
3 level of nasal colonisation of MRSA in elderly residents of care homes in the UK. Sixty  
4 five homes and 2492 residents participated in the study which took place over a 28  
5 month period (November 2006-February 2009). The study included a large proportion  
6 of care homes in the area served by Leeds Primary Care Trust, including homes of  
7 different sizes (n = 20-180 beds), homes owned by the local authority and by  
8 independent providers, and homes with and without nursing capability. In total, 888  
9 MRSA isolates were identified from 4325 nasal swabs during the periods of screening  
10 stated. The mean level of MRSA colonisation was 20% (95% CI = 18-23%), which was  
11 higher than levels recorded during the 1990s but comparable to those reported recently  
12 (22-23%).<sup>14;17</sup> Interestingly, a recent survey of 748 residents in 51 care homes in  
13 Gloucestershire and Bristol found that only 7.9% residents were positive for MRSA by  
14 nasal screening, indicating marked geographical variation in MRSA prevalence in care  
15 homes.<sup>24</sup>

16 The health outcomes of residents are not commonly included in studies of  
17 MRSA prevalence in the care home.<sup>17;25;26</sup> The findings of the present study support  
18 the hypothesis that although MRSA infections in the care home setting are infrequent,  
19 colonised residents have an increased risk of developing an infection.<sup>15;27</sup> MRSA  
20 colonisation was associated with previous and subsequent MRSA infection; residents  
21 colonised with MRSA were two and a half times more likely to develop a MRSA  
22 infection than non-carriers. Notably, however, MRSA colonisation was not significantly  
23 associated with mortality in a logistic regression model, a finding which has been  
24 reported by others, albeit in a lower prevalence setting.<sup>28</sup>

25 The intervention applied in the present study was intended to improve  
26 awareness of good practice and knowledge of infection control in care homes, with an

1 emphasis on hand hygiene. The present study assessed the infection prevention  
2 knowledge of over 1000 members of staff and the infection prevention practice of more  
3 than 300 individuals. The stepped-wedge design allowed measurement of MRSA  
4 prevalence before the intervention, directly after the intervention, and further follow-up  
5 in two out of three study groups. Participating residents and staff in each group of  
6 homes acted as controls for each other. Three established methods were used to  
7 measure staff knowledge and behaviour following the intervention and scores improved  
8 after the intervention for all three assessments. Overall, no significant difference in  
9 MRSA prevalence was identified during the survey periods. Directly following the  
10 intervention, however, there was a significant increase in MRSA prevalence, although  
11 this returned to baseline levels in one group that had follow-up. Stepped-wedge  
12 designs are particularly susceptible to trends within subgroups, but when the  
13 subgroups were adjusted for linear trends, the increase in MRSA prevalence after the  
14 intervention remained significant. It is possible that other confounding factors resulted  
15 in a non-linear trend in MRSA prevalence in certain homes. It has not been possible to  
16 identify or control for these factors. MRSA infections are unlikely to be independent  
17 events and a cluster of MRSA cases may explain temporary increases in prevalence  
18 following the intervention in some homes.

19 Other studies have used a similar intervention strategy in care homes.<sup>29-31</sup> A  
20 study based in Taiwan introduced a programme of hand hygiene training into three  
21 care homes and identified significant improvements in scores for staff knowledge and  
22 behaviour after the training; difference between hand hygiene knowledge pre- and  
23 post-intervention,  $p < 0.001$ ; difference between hand hygiene observations pre- and  
24 post-intervention,  $p = 0.001$ .<sup>30</sup> Although no direct measure of microbiological outcome  
25 was included, rates of infection based on the total number of urinary tract infections,  
26 lower respiratory infections and rates of influenza recorded by each facility, were

1 significantly lower following the intervention (1.52%) compared with rates recorded for  
2 two periods before the intervention; December 2004-February 2005 (1.74%) and  
3 June-August 2005 (2.04%) ( $p < 0.001$ ).

4         Around the same time as the present study, Baldwin *et al.* (2010) implemented  
5 an infection control education and training programme in nursing homes in the Belfast  
6 area of Northern Ireland.<sup>29</sup> The study screened 793 residents and 338 members of  
7 staff for MRSA colonisation. The education programme, occurring at baseline and at  
8 three and six months, consisted of multiple training sessions for staff. An existing  
9 member of staff in each intervention home was assigned the role of infection control  
10 link worker, the role of which was to reinforce good infection control practice in the  
11 home. Practice was observed and recorded, with feedback, for an audit of ten  
12 specified infection control standards involving the following subject areas: cleanliness,  
13 decontamination (hand and environment), waste management, personal protective  
14 equipment and the management of wounds, urinary catheters and enteral feeding.  
15 Using a cluster randomised controlled study design, audit scores and MRSA  
16 colonisation of residents and staff were compared for homes in the intervention group  
17 ( $n = 16$ ) with those homes in the control group ( $n = 16$ ); homes in the control group did  
18 not receive training or feedback. While scores for the infection control audits  
19 significantly improved in eight of the ten standards (82% vs. 64% in intervention and  
20 control homes, respectively,  $p < 0.0001$ ), levels of MRSA colonisation did not change  
21 over the 12 month study period in either residents or staff.

22         In contrast, Gopal *et al.* (2009) evaluated whether enhanced infection control  
23 support in nursing homes had an impact on improving infection control practice.<sup>31</sup> The  
24 intervention included extensive support from a dedicated infection control team,  
25 including an infection control nurse, infection control nurse specialist and an infection  
26 control doctor. Twelve homes were included in the study and were divided into two

1 groups of six, an intervention group and a control group, based on the number of  
2 residents. The study found no statistical difference between the control group and the  
3 group of homes that received the intervention at baseline and final assessment for  
4 hand hygiene facilities ( $p = 0.69$ ), environmental cleanliness ( $p = 0.43$ ) and disposal of  
5 clinical waste ( $p = 0.96$ ). There was no microbiological investigation included in this  
6 evaluation.

7 In principle, the intervention applied in the present study was plausible and  
8 unlikely to be harmful. The assessments were reasonable, albeit focussed on  
9 short-term effects; however, the following limitations of the study must be  
10 acknowledged. It is likely that the prevalence reported here is an underestimation of  
11 the true level of MRSA colonisation because of the use of nasal screening alone. To  
12 achieve a high-level of sensitivity of detection (>90%) of MRSA carriers, multiple sites  
13 (e.g. axilla, groin, nose and throat) need to be screened.<sup>32,33</sup> Screening urethral  
14 catheters, legs ulcers and pressure sores would have increased the sensitivity of  
15 MRSA detection and may have provided further information regarding the infection  
16 status of the resident. Although pooling swabs from multiple sites could have been  
17 done at the same cost, screening the anterior nares as a single site using chromagar  
18 as a growth medium was a compromise, taking into account the difficulties of obtaining  
19 consent and practical issues associated with more extensive sampling of a  
20 predominantly frail, elderly population and the need for a cost-effective approach.

21 The study aimed to deliver educational input to at least 80% whole-time  
22 equivalent staff. As only one individual is required to break the chain of infection  
23 control; the study ought to have included all full- and part-time employees, or as a  
24 minimum included all key personnel, in terms of influencing practice, in each setting.  
25 Although observational methods of assessing hand hygiene compliance are considered  
26 the gold standard,<sup>34</sup> increased productivity due to observation, known as the

1 Hawthorne effect, must be considered.<sup>35;36</sup> Despite long-term microbiological follow-up  
2 (8-25 months), the duration of follow-up with regards to staff knowledge and behaviour  
3 remained short (approximately four weeks). While the anonymous design of the  
4 present study kept assessment of the intervention informal, it did not enable the  
5 long-term follow-up of knowledge and practice in individual staff.

6 The intervention applied in the present study focused on a particular area of  
7 infection prevention, that of hand hygiene, skin care and personal protective  
8 equipment. Hand hygiene is considered to be an educational priority; however, there is  
9 little evidence to suggest that improvements in hand hygiene alone result in a  
10 significant reduction in MRSA infection or colonisation.<sup>37</sup> Additional educational topics  
11 may include risk factors for infection and how to identify residents at risk, care of  
12 wounds and invasive devices, and education about the judicious use of antibiotics.<sup>38</sup>  
13 Implementation of an intervention in a setting such as that of the care home, which  
14 experiences a high level of change, in terms of employee and resident throughput,  
15 cannot be expected to last long-term without regular input. A single session of  
16 education per staff member is unlikely to make a large difference to long-term practice.  
17 Alternative training and education strategies may include more frequent educational  
18 sessions, with additional learning resources, such as e-learning. Others have reported,  
19 however, that the introduction of multiple training sessions did not result in a decrease  
20 in MRSA prevalence,<sup>29</sup> and care homes that had access to extensive infection control  
21 support failed to show improvements in audit scores.<sup>31</sup>

22 The use of interventions that focus on screening and decolonisation of residents  
23 and/or staff may reduce MRSA prevalence in care homes. Given the difficulty of  
24 achieving MRSA decolonisation in individuals with multiple risk factors for persistence,  
25 this would be a considerable undertaking, and may risk resistance selection. Control of  
26 risk factors for MRSA colonisation, such as improved management of wounds and

1  
2  
3  
4 1 invasive devices may be beneficial.<sup>38</sup> Evaluation would be required to assess the cost  
5  
6 2 *versus* benefit of interventions involving screening and decolonisation in the care home  
7  
8 3 setting, along with consideration about the source of funding if such approaches were  
9  
10 4 to be recommended,<sup>39;40</sup> Given the large recent and continuing decreases in incidence  
11  
12 5 of invasive MRSA infection in England,<sup>9</sup> it remains possible that control measures in  
13  
14 6 the secondary care setting will lead to reduced MRSA carriage in care home residents.  
15  
16  
17

## 18 **Conclusion**

19  
20 8 These results reinforce previous reports of high MRSA colonisation rates in  
21  
22 9 elderly residents of care homes. The intervention applied in the present study  
23  
24 10 improved staff practice and knowledge but did not reduce MRSA prevalence in  
25  
26 11 residents. These data provide an important baseline for future surveillance of MRSA in  
27  
28 12 the care home setting. Further work is needed regarding screening, decolonisation  
29  
30 13 and re-entry to the care home and continued surveillance is needed to understand the  
31  
32 14 interaction between MRSA in care homes and hospitals.  
33  
34  
35  
36  
37  
38  
39  
40  
41  
42  
43  
44  
45  
46  
47  
48  
49  
50  
51  
52  
53  
54  
55  
56  
57  
58  
59  
60

## 1     **References**

- 2     1     Gardam M. Is methicillin-resistant *Staphylococcus aureus* an emerging community  
3     pathogen? A review of the literature. *Can J Infect Dis* 2000;11:202-211.
- 4     2     Grundmann H, Aires-de-Sousa M, Boyce J et al. Emergence and resurgence of  
5     meticillin-resistant *Staphylococcus aureus* as a public-health threat. *Lancet*  
6     2006;368:874-885.
- 7     3     Health Protection Agency. Mandatory *Staphylococcus aureus* bacteraemia  
8     surveillance scheme. 2009.  
9     <http://www.hpa.org.uk/HPA/Topics/InfectiousDiseases/InfectionsAZ/119194216977>  
10    [3/](http://www.hpa.org.uk/HPA/Topics/InfectiousDiseases/InfectionsAZ/119194216977).
- 11    4     Hope R, Livermore DM, Brick G et al. Non-susceptibility trends among  
12    staphylococci from bacteraemias in the UK and Ireland, 2001-06. *J Antimicrob*  
13    *Chemother* 2008;62, Suppl 2:ii65-ii74.
- 14    5     Department of Health. Bloodborne MRSA infection rates to be halved by 2008.  
15    2004.  
16    [http://www.dh.gov.uk/en/Publicationsandstatistics/Pressreleases/DH\\_4093533](http://www.dh.gov.uk/en/Publicationsandstatistics/Pressreleases/DH_4093533).
- 17    6     Department of Health. Screening for methicillin-resistant *Staphylococcus aureus*  
18    (MRSA) colonisation: a strategy for NHS trusts - a summary of best practice. 2006.  
19    10-11-2009.
- 20    7     Coia JE, Duckworth GJ, Edwards DI et al. Guidelines for the control and prevention  
21    of methicillin-resistant *Staphylococcus aureus* (MRSA) in healthcare facilities. *J Hosp*  
22    *Infect* 2006;63, Suppl 1:S1-44.



- 1  
2  
3  
4 1 8 Department of Health. Infection control guidance for care homes. 2006. London,  
5  
6  
7 2 England, Department of Health.  
8  
9  
10 3 9 Health Protection Agency. Quarterly Epidemiological Commentary: Mandatory  
11  
12 4 MRSA bacteraemia & *Clostridium difficile* infection (October 2007 to December  
13  
14 5 2009). 2010. [http://www.hpa.org.uk/web/HPAwebFile/HPAweb\\_C/1267551242367](http://www.hpa.org.uk/web/HPAwebFile/HPAweb_C/1267551242367).  
15  
16  
17 6 10 Care Quality Commission. Working together to prevent and control infections. 2009.  
18  
19 7 [http://www.cqc.org.uk/db/documents/Working\\_together\\_to\\_prevent\\_and\\_control](http://www.cqc.org.uk/db/documents/Working_together_to_prevent_and_control_infections.pdf)  
20  
21 8 [infections.pdf](http://www.cqc.org.uk/db/documents/Working_together_to_prevent_and_control_infections.pdf).  
22  
23  
24  
25 9 11 Cox RA, Bowie PE. Methicillin-resistant *Staphylococcus aureus* colonization in  
26  
27 10 nursing home residents: a prevalence study in Northamptonshire. *J Hosp Infect*  
28  
29 11 1999;43:115-122.  
30  
31  
32 12 12 Fraise AP, Mitchell K, O'Brien SJ et al. Methicillin-resistant *Staphylococcus aureus*  
33  
34 13 (MRSA) in nursing homes in a major UK city: an anonymized point prevalence  
35  
36 14 survey. *Epidemiol Infect* 1997;118:1-5.  
37  
38  
39  
40 15 13 Namnyak S, Adhami Z, Wilmore M et al. Methicillin-resistant *Staphylococcus*  
41  
42 16 *aureus*: a questionnaire and microbiological survey of nursing and residential  
43  
44 17 homes in Barking, Havering and Brentwood. *J Infect* 1998;36:67-72.  
45  
46  
47  
48 18 14 Barr B, Wilcox MH, Brady A et al. Prevalence of methicillin-resistant  
49  
50 19 *Staphylococcus aureus* colonization among older residents of care homes in the  
51  
52 20 United Kingdom. *Infect Control Hosp Epidemiol* 2007;28:853-859.  
53  
54  
55 21 15 Baldwin NS, Gilpin DF, Hughes CM et al. Prevalence of methicillin-resistant  
56  
57 22 *Staphylococcus aureus* colonization in residents and staff in nursing homes in  
58  
59 23 Northern Ireland. *J Am Geriatr Soc* 2009;57:620-626.  
60

- 1  
2  
3  
4 16 Eveillard M, Charru P, Rufat P et al. Methicillin-resistant *Staphylococcus aureus*  
5  
6 2 carriage in a long-term care facility: hypothesis about selection and transmission.  
7  
8  
9 3 *Age Ageing* 2008;37:294-299.
- 10  
11  
12 4 17 Stone ND, Lewis DR, Lowery HK et al. Importance of bacterial burden among  
13  
14 5 methicillin-resistant *Staphylococcus aureus* carriers in a long-term care facility.  
15  
16 6 *Infect Control Hosp Epidemiol* 2008;29:143-148.
- 17  
18  
19 7 18 Hughes CM, Smith MB, Tunney MM. Infection control strategies for preventing the  
20  
21 8 transmission of methicillin-resistant *Staphylococcus aureus* (MRSA) in nursing  
22  
23 9 homes for older people. *Cochrane Database Syst Rev* CD006354 2008;(1).
- 24  
25  
26  
27 10 19 Care Standards Act. 2000. London, England, The Stationery Office Limited. 2006.
- 28  
29  
30 11 20 Care Quality Commission. 2009. <http://www.cqc.org.uk/>.
- 31  
32  
33 12 21 Hussey MA, Hughes JP. Design and analysis of stepped wedge cluster randomized  
34  
35 13 trials. *Contemporary Clinical Trials* 2007;28:182-191.
- 36  
37  
38 14 22 Infection Control Nurses Association. Audit tool for monitoring infection control  
39  
40 15 standards in community settings. 2005.
- 41  
42 16 <http://www.ips.uk.net/template1.aspx?PageID=10&cid=19&category=Resources>.
- 43  
44  
45  
46 17 23 NHS. Lewisham hand hygiene audit tool. 2006. [http://www.clean-safe-](http://www.clean-safe-care.nhs.uk/index.php?pid=5)  
47  
48 18 [care.nhs.uk/index.php?pid=5](http://www.clean-safe-care.nhs.uk/index.php?pid=5).
- 49  
50  
51 19 24 Lasseter G, Charlett A, Lewis D et al. *Staphylococcus aureus* carriage in care  
52  
53 20 homes: identification of risk factors, including the role of dementia. *Epidemiol Infect*  
54  
55 21 2010;138:686-696.
- 56  
57  
58  
59  
60

- 1  
2  
3  
4 1 25 Mody L, Kauffman CA, Donabedian S et al. Epidemiology of *Staphylococcus*  
5  
6  
7 2 *aureus* colonization in nursing home residents. *Clin Infect Dis* 2008;46:1368-1373.  
8  
9  
10 3 26 von Baum H, Schmidt C, Svoboda D et al. Risk factors for methicillin-resistant  
11  
12 4 *Staphylococcus aureus* carriage in residents of German nursing homes. *Infect*  
13  
14 5 *Control Hosp Epidemiol* 2002;23:511-515.  
15  
16  
17 6 27 Bradley SF, Terpenning MS, Ramsey MA et al. Methicillin-resistant *Staphylococcus*  
18  
19 7 *aureus*: colonization and infection in a long-term care facility. *Ann Intern Med*  
20  
21 8 1991;115:417-422.  
22  
23  
24 9 28 Datta R, Huang SS. Risk of infection and death due to methicillin-resistant  
25  
26 10 *Staphylococcus aureus* in long-term carriers. *Clin Infect Dis* 2008;47:176-181.  
27  
28  
29  
30 11 29 Baldwin NS, Gilpin DF, Tunney MM et al. Cluster randomised controlled trial of an  
31  
32 12 infection control education and training intervention programme focusing on  
33  
34 13 methicillin-resistant *Staphylococcus aureus* in nursing homes for older people. *J*  
35  
36 14 *Hosp Infect* 2010;76:36-41.  
37  
38  
39  
40 15 30 Huang TT, Wu SC. Evaluation of a training programme on knowledge and  
41  
42 16 compliance of nurse assistants' hand hygiene in nursing homes. *J Hosp Infect*  
43  
44 17 2008;68:164-170.  
45  
46  
47 18 31 Gopal RG, Jeanes A, Russell H et al. Effectiveness of short-term, enhanced,  
48  
49 19 infection control support in improving compliance with infection control guidelines  
50  
51 20 and practice in nursing homes: a cluster randomized trial. *Epidemiol Infect*  
52  
53 21 2009;137:1465-1471.  
54  
55  
56  
57  
58  
59  
60

- 1  
2  
3  
4 1 32 Marshall C, Spelman D. Re: is throat screening necessary to detect methicillin-  
5  
6 2 resistant *Staphylococcus aureus* colonization in patients upon admission to an  
7  
8 3 intensive care unit? *J Clin Microbiol* 2007;45:3855.  
9  
10  
11  
12 4 33 Lautenbach E, Nachamkin I, Hu B et al. Surveillance cultures for detection of  
13  
14 5 methicillin-resistant *Staphylococcus aureus*: diagnostic yield of anatomic sites and  
15  
16 6 comparison of provider- and patient-collected samples. *Infect Control Hosp*  
17  
18 7 *Epidemiol* 2009;30:380-382.  
19  
20  
21  
22 8 34 Moret L, Tequi B, Lombrail P. Should self-assessment methods be used to  
23  
24 9 measure compliance with handwashing recommendations? A study carried out in a  
25  
26 10 French university hospital. *Am J Infect Control* 2004;32:384-390.  
27  
28  
29 11 35 Kohli E, Ptak J, Smith R et al. Variability in the Hawthorne effect with regard to hand  
30  
31 12 hygiene performance in high- and low-performing inpatient care units. *Infect Control*  
32  
33 13 *Hosp Epidemiol* 2009;30:222-225.  
34  
35  
36 14 36 Holden JD. Hawthorne effects and research into professional practice. *J Eval Clin*  
37  
38 15 *Pract* 2001;7:65-70.  
39  
40  
41  
42 16 37 Backman C, Zoutman DE, Marck PB. An integrative review of the current evidence  
43  
44 17 on the relationship between hand hygiene interventions and the incidence of health  
45  
46 18 care-associated infections. *Am J Infect Control* 2008;36:333-348.  
47  
48  
49 19 38 Manzur A, Gavalda L, Ruiz de GE et al. Prevalence of methicillin-resistant  
50  
51 20 *Staphylococcus aureus* and factors associated with colonization among residents in  
52  
53 21 community long-term-care facilities in Spain. *Clin Microbiol Infect* 2008;14:867-872.  
54  
55  
56  
57  
58  
59  
60

1  
2  
3  
4 1 39 Coates T, Bax R, Coates A. Nasal decolonization of *Staphylococcus aureus* with  
5  
6 2 mupirocin: strengths, weaknesses and future prospects. *J Antimicrob Chemother*  
7  
8 3 2009;64:9-15.  
9

10  
11  
12 4 40 Dancer SJ. Considering the introduction of universal MRSA screening. *J Hosp*  
13  
14 5 *Infect* 2008;69:315-320.  
15

16  
17  
18  
19 7  
20  
21 8 **Legend for Figure 1.**

22  
23  
24 9 **Changes in MRSA prevalence by Intervention Group per survey, before and after**  
25  
26 10 **the intervention.**  
27

28  
29 11  
30  
31  
32  
33  
34  
35  
36  
37  
38  
39  
40  
41  
42  
43  
44  
45  
46  
47  
48  
49  
50  
51  
52  
53  
54  
55  
56  
57  
58  
59  
60

1  
2  
3  
4  
5  
6  
7  
8  
9  
10  
11  
12  
13  
14  
15  
16  
17  
18  
19  
20  
21  
22  
23  
24  
25  
26  
27  
28  
29  
30  
31  
32  
33  
34  
35  
36  
37  
38  
39  
40  
41  
42  
43  
44  
45  
46  
47  
48  
49  
50  
51  
52  
53  
54  
55  
56  
57  
58  
59  
60

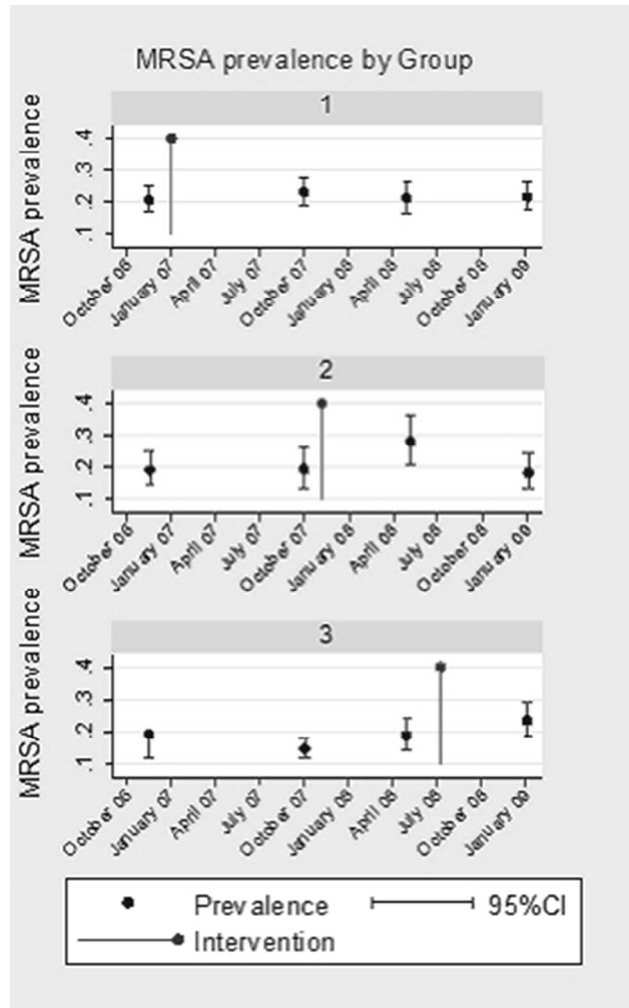

Changes in MRSA prevalence by Intervention Group per survey, before and after the intervention.  
83x135mm (96 x 96 DPI)

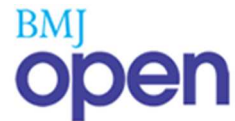

**The longitudinal prevalence of MRSA in care home residents and the effectiveness of improving infection prevention knowledge and practice on colonisation using a stepped wedge study design**

|                                 |                                                                                                                                                                                                                                                                                                                                                                                                                          |
|---------------------------------|--------------------------------------------------------------------------------------------------------------------------------------------------------------------------------------------------------------------------------------------------------------------------------------------------------------------------------------------------------------------------------------------------------------------------|
| Journal:                        | <i>BMJ Open</i>                                                                                                                                                                                                                                                                                                                                                                                                          |
| Manuscript ID:                  | bmjopen-2011-000423.R1                                                                                                                                                                                                                                                                                                                                                                                                   |
| Article Type:                   | Research                                                                                                                                                                                                                                                                                                                                                                                                                 |
| Date Submitted by the Author:   | 23-Nov-2011                                                                                                                                                                                                                                                                                                                                                                                                              |
| Complete List of Authors:       | Horner, Carolyne; Leeds Teaching Hospitals NHS Trust, Microbiology<br>Wilcox, Mark; Leeds Teaching Hospitals NHS Trust, Microbiology<br>Barr, Ben; University of Liverpool, Division of Public Health<br>Hall, David; NHS Leeds,<br>Hodgson, Gillian; Leeds Teaching Hospitals NHS Trust, Microbiology<br>Parnell, Peter; Leeds Teaching Hospitals NHS Trust, Microbiology<br>Tompkins, David; Health Protection Agency, |
| <b>Primary Subject Heading</b>: | Health services research                                                                                                                                                                                                                                                                                                                                                                                                 |
| Secondary Subject Heading:      | Public health, Infectious diseases                                                                                                                                                                                                                                                                                                                                                                                       |
| Keywords:                       | carriage, transmission, intervention                                                                                                                                                                                                                                                                                                                                                                                     |
|                                 |                                                                                                                                                                                                                                                                                                                                                                                                                          |

SCHOLARONE™  
Manuscripts

## ORION Checklist of items to include when reporting an outbreak or intervention study of a nosocomial organism

|                                        | Item Number | Descriptor                                                                                                                                                                                                                                                                                                                                                                                                                                                                                                                                                                                                                                                                                                                               |
|----------------------------------------|-------------|------------------------------------------------------------------------------------------------------------------------------------------------------------------------------------------------------------------------------------------------------------------------------------------------------------------------------------------------------------------------------------------------------------------------------------------------------------------------------------------------------------------------------------------------------------------------------------------------------------------------------------------------------------------------------------------------------------------------------------------|
| <b>Title &amp; Abstract</b>            | 1           | Description of paper as outbreak report or intervention study.<br>Design of intervention study (eg Randomised Controlled Trial , Cluster Randomised Controlled Trial, Interrupted Time Series, Cohort study etc).<br>Brief description of intervention and main outcomes. - DONE                                                                                                                                                                                                                                                                                                                                                                                                                                                         |
| <b>Introduction Background</b>         | 2           | Scientific and/or local clinical background and rationale.<br>Description of organism as epidemic, endemic or epidemic becoming endemic. - DONE                                                                                                                                                                                                                                                                                                                                                                                                                                                                                                                                                                                          |
| Type of paper                          | 3           | Description of paper as Intervention study or an Outbreak Report.<br>If an outbreak report, report the number of outbreaks. - DONE                                                                                                                                                                                                                                                                                                                                                                                                                                                                                                                                                                                                       |
| Dates                                  | 4           | Start and finish dates of the study or report. - DONE                                                                                                                                                                                                                                                                                                                                                                                                                                                                                                                                                                                                                                                                                    |
| Objectives                             | 5           | Objectives for outbreak reports. Hypotheses for intervention studies - DONE                                                                                                                                                                                                                                                                                                                                                                                                                                                                                                                                                                                                                                                              |
| <b>Methods Design</b>                  | 6           | Study design. Use of EPOC classification recommended (RCT or CRCT, CBA, or ITS) - STEP WEDGE DESIGN<br>Whether study was retrospective, prospective or ambidirectional.<br>Whether decision to report or intervene was prompted by any outcome data.<br>Whether study was formally implemented with predefined protocol and endpoints.                                                                                                                                                                                                                                                                                                                                                                                                   |
| Participants                           | 7           | Number of patients admitted in study or outbreak. Summaries of distributions of age and lengths of stays. If possible, proportion admitted from other wards, hospitals, nursing homes or from abroad. Where relevant, potential risk factors for acquiring the organism. Eligibility criteria for study. Case definitions for outbreak report. -DONE                                                                                                                                                                                                                                                                                                                                                                                     |
| Setting                                | 8           | Description of the unit, ward or hospital and, if a hospital, the units included.<br>Number of beds, the presence and staffing levels of an infection control team. - DONE                                                                                                                                                                                                                                                                                                                                                                                                                                                                                                                                                               |
| Interventions                          | 9           | Definition of phases by major change in specific infection control practice (with start and stop dates). A summary table is strongly recommended with precise details of interventions, how and when administered in each phase. - DONE                                                                                                                                                                                                                                                                                                                                                                                                                                                                                                  |
| Culturing & Typing                     | 10          | Details of culture media, use of selective antibiotics and local and /or reference typing. Where relevant, details of environmental sampling. - DONE                                                                                                                                                                                                                                                                                                                                                                                                                                                                                                                                                                                     |
| Infection-related outcomes             | 11          | Clearly defined primary and secondary outcomes (eg incidence of infection, colonisation , bacteraemia) at regular time intervals (eg daily, weekly, monthly) rather than as totals for each phase, with at least three data points per phase and, for many two phase studies, 12 or more monthly data points per phase. Denominators (eg numbers admissions or discharges, patient bed days). If possible, prevalence of organism and incidence of colonisation on admission at same time intervals. Criteria for infection, colonisation on admission and directly attributable mortality.<br>For short studies or outbreak reports, use of charts with duration patient stay & dates organism detected may be useful (see text) - DONE |
| Economic outcomes                      | 12          | If a formal economic study done, definition of outcomes to be reported, description of resources used in interventions, with costs broken down to basic units, stating important assumptions.- NOT APPLICABLE                                                                                                                                                                                                                                                                                                                                                                                                                                                                                                                            |
| Potential Threats to internal validity | 13          | Which potential confounders were considered, recorded or adjusted for (eg: changes in length of stay, case mix, bed occupancy, staffing levels, hand-hygiene compliance, antibiotic use, strain type, processing of isolates, seasonality).<br>Description of measures to avoid bias including blinding & standardisation of outcome assessment & provision of care. - DONE                                                                                                                                                                                                                                                                                                                                                              |
| Sample size                            | 14          | Details of power calculations, where appropriate - ARE AVAILABLE IF REQUIRED                                                                                                                                                                                                                                                                                                                                                                                                                                                                                                                                                                                                                                                             |
| Statistical methods                    | 15          | Description of statistical methods to compare groups or phases. Methods for any subgroup or adjusted analyses, distinguishing between planned and unplanned (exploratory) analysis. Unless outcomes are independent, statistical approaches able to account for dependencies in the outcome data should be used, adjusting, where necessary, for potential confounders. - DONE<br>For outbreak reports statistical analysis may be inappropriate.                                                                                                                                                                                                                                                                                        |
| <b>Results Recruitment</b>             | 16          | For relevant designs the dates defining periods of recruitment and follow-up. A flow diagram is recommended to describe participant flow in each stage of study. - NOT APPLICABLE                                                                                                                                                                                                                                                                                                                                                                                                                                                                                                                                                        |
| Outcomes & estimation                  | 17          | For the main outcomes, the estimated effect size and its precision (usually using confidence intervals). A graphical summary of the outcome data is often appropriate for dependent data (such as most time series). - DONE                                                                                                                                                                                                                                                                                                                                                                                                                                                                                                              |
| Ancillary analyses                     | 18          | Any subgroup analyses should be reported and it should be stated whether or not it was planned (specified in the protocol) and possible confounders adjusted for - DONE                                                                                                                                                                                                                                                                                                                                                                                                                                                                                                                                                                  |
| Adverse events                         | 19          | Pre-specified categories of adverse events and occurrences of these in each intervention group . This might include drug side effects, crude or disease specific mortality in antibiotic policy studies or opportunity costs in isolation studies. - NOT APPLICABLE                                                                                                                                                                                                                                                                                                                                                                                                                                                                      |
| <b>Discussion Interpretation</b>       | 20          | For intervention studies an assessment of evidence for/against hypotheses, accounting for potential threats to validity of inference including regression to mean effects and reporting bias.<br>For outbreak reports, consider clinical significance of observations and hypotheses generated to explain them. - NOT APPLICABLE                                                                                                                                                                                                                                                                                                                                                                                                         |
| Generalisability                       | 21          | External validity of the findings of the intervention study i.e. to what degree can results be expected to generalise to different target populations or settings. - DONE                                                                                                                                                                                                                                                                                                                                                                                                                                                                                                                                                                |
| Overall evidence                       | 22          | General interpretation of results in context of current evidence. - DONE                                                                                                                                                                                                                                                                                                                                                                                                                                                                                                                                                                                                                                                                 |



**Abbreviations:** RCT: randomised controlled trial CRCT : Cluster Randomised Controlled Trial CBA: controlled before and after study ITS: interrupted time series

For peer review only

1  
2  
3  
4  
5  
6  
7  
8  
9  
10  
11  
12  
13  
14  
15  
16  
17  
18  
19  
20  
21  
22  
23  
24  
25  
26  
27  
28  
29  
30  
31  
32  
33  
34  
35  
36  
37  
38  
39  
40  
41  
42  
43  
44  
45  
46  
47

1  
2  
3  
4  
5  
6  
7  
8  
9  
10  
11  
12  
13  
14  
15  
16  
17  
18  
19  
20  
21  
22  
23  
24  
25  
26  
27  
28  
29  
30  
31  
32  
33  
34  
35  
36  
37  
38  
39  
40  
41  
42  
43  
44  
45  
46  
47  
48  
49  
50  
51  
52  
53  
54  
55  
56  
57  
58  
59  
60

1   **The longitudinal prevalence of MRSA in care home residents and the**  
2   **effectiveness of improving infection prevention knowledge and practice**  
3   **on colonisation using a stepped wedge study design**

4   **C Horner, M Wilcox, B Barr, D Hall, G Hodgson, P Parnell, & D Tompkins**

5   C Horner Clinical Scientist, Leeds Teaching Hospitals NHS Trust, Department of  
6   Microbiology, Old Medical School, Leeds General Infirmary, Leeds, LS1 3EX

7   M Wilcox Consultant/Clinical Director of Microbiology/Pathology, Leeds Teaching  
8   Hospitals NHS Trust, Department of Microbiology, Old Medical School, Leeds General  
9   Infirmary, Leeds, LS1 3EX

10   B Barr Specialty Registrar in Public Health, University of Liverpool, Division of Public  
11   Health, Whelan Building, Quadrangle, Liverpool, L69 3GB

12   D Hall Infection Prevention and Control Nurse, NHS Leeds, Sycamore Lodge, 7a  
13   Woodhouse Cliff, Leeds, LS6 2HF

14   G Hodgson Nurse Consultant Leeds Teaching Hospitals NHS Trust, Infection  
15   Prevention and Control, Leeds General Infirmary, Leeds, LS1 3EX

16   P Parnell Senior Biomedical Scientist, Department of Microbiology, Old Medical  
17   School, Leeds General Infirmary, Leeds, LS1 3EX

18   D Tompkins Former Regional Microbiologist, HPA Yorkshire and the Humber, Bridle  
19   Path, York Road, Leeds, LS15 7TR

20   Corresponding author and address for reprints: [Mark.wilcox@leedsth.nhs.uk](mailto:Mark.wilcox@leedsth.nhs.uk).

21   **Word count:** 5788. The manuscript contains four tables (Tables 1-4) and one figure  
22   (Figure 1).

23

## 1 Copyright/licence for publication

2 The Corresponding Author has the right to grant on behalf of all authors and does grant  
3 on behalf of all authors, an exclusive licence (or non exclusive for government  
4 employees) on a worldwide basis to the BMJ Publishing Group Ltd and its licensees ,  
5 to permit this article (if accepted) to be published in BMJ editions and any other  
6 BMJPG products and to exploit all subsidiary rights, as set out in our licence  
7 (<http://resources.bmj.com/bmj/authors/checklists-forms/licence-for-publication>).

## 8 Competing interest declaration

9 All authors have completed the ICMJE uniform disclosure form at  
10 [www.icmje.org/coi\\_disclosure.pdf](http://www.icmje.org/coi_disclosure.pdf) (available on request from the corresponding author)  
11 and declare: no support from any organisation for the submitted work; no financial  
12 relationships with any organisations that might have an interest in the submitted work in  
13 the previous three years; no other financial or non-financial relationships or interests  
14 that that may be relevant to the submitted work.

## 15 Acknowledgements

16 The authors thank the residents and staff of all the participating care homes, the  
17 Infection Control Nurses at North East Leeds PCT, Richard Dixon (Information  
18 Manager at Leeds Primary Care Trust), Warren Fawley and the Infection Control  
19 laboratory staff at the Leeds Teaching Hospitals NHS Trust, James Riach for  
20 assistance with data entry, and Dr John Heritage (University of Leeds) for advice and  
21 assistance in writing this manuscript.

## 22 Contributors

23 MW was the lead investigator and obtained funding for the study. All authors were  
24 involved in the study design and reviewed the draft of this report. CH coordinated the  
25 data management and drafted this report. GH and DT were integral to the setting up  
26 and management of the study. BB carried out the statistical analysis. PP was

1 responsible for laboratory protocol development. DH carried out the data collection  
2 and the sampling of residents with assistance from other Infection Control Nurses,  
3 North East Leeds PCT. MW is the guarantor of the study. **All authors have approved**  
4 **the final submitted version of the manuscript.**

#### 5 **Funding**

6 This is an independent report commissioned and funded by the Policy Research  
7 Programme in the Department of Health. The views expressed are not necessarily  
8 those of the Department.

#### 9 **Ethics approval**

10 The study received approval from the East Leeds Research Ethics Committee: MREC  
11 reference number 06/Q1206/162.

12

## 1 Article Summary

### 2 1) Article Focus

3 To assess the effectiveness of an educational intervention on the prevalence of MRSA  
4 in care homes for the elderly.

### 5 2) Key messages

- 6 • There was a high rate of MRSA colonisation in elderly residents of care homes  
7 during the study period.
- 8 • The intervention improved the infection prevention knowledge and practice of  
9 staff working in care homes, but did not reduce the prevalence of MRSA  
10 colonisation of residents.
- 11 • **MRSA colonisation was associated with previous and subsequent MRSA**  
12 **infection, but was not significantly associated with subsequent**  
13 **hospitalisation or mortality.**
- 14 • Additional measures are required to reduce endemic MRSA colonisation in care  
15 homes.

### 16 3) Strengths and limitations of this study

- 17 • This is a large prospective study, including 65 homes and 2492 residents.  
18 MRSA prevalence was monitored over a 28 month period.
- 19 • The intervention was plausible, unlikely to be harmful and the assessments of  
20 the intervention were reasonable.
- 21 • A significant improvement was seen in scores for all three intervention  
22 assessment methods; however, the intervention was associated with a small  
23 but significant increase in MRSA prevalence.

1  
2  
3  
4  
5  
6  
7  
8  
9  
10  
11  
12  
13  
14  
15  
16  
17  
18  
19  
20  
21  
22  
23  
24  
25  
26  
27  
28  
29  
30  
31  
32  
33  
34  
35  
36  
37  
38  
39  
40  
41  
42  
43  
44  
45  
46  
47  
48  
49  
50  
51  
52  
53  
54  
55  
56  
57  
58  
59  
60

- 1 • It was not possible to identify or control for the factors responsible for the
- 2 increase in MRSA prevalence following the intervention.
- 3

For peer review only

1  
2  
3  
4 **Abstract (250 words)**

5  
6 **Objectives:** To determine the prevalence and health outcomes of meticillin-resistant  
7 *Staphylococcus aureus* (MRSA) colonisation in elderly care home residents. To  
8  
9  
10  
11  
12  
13  
14  
15  
16  
17  
18  
19  
20  
21  
22  
23  
24  
25  
26  
27  
28  
29  
30  
31  
32  
33  
34  
35  
36  
37  
38  
39  
40  
41  
42  
43  
44  
45  
46  
47  
48  
49  
50  
51  
52  
53  
54  
55  
56  
57  
58  
59  
60  
measure the effectiveness of improving infection prevention knowledge and practice on  
MRSA prevalence.

6 **Setting:** Care homes for elderly residents in Leeds, UK.

7 **Participants:** Residents able to give informed consent.

8 **Design:** A controlled intervention study, using a stepped-wedge design, comprising 65  
9 homes divided into three groups. Baseline MRSA prevalence was determined by  
10 screening the nares of residents (n = 2492). An intervention based upon staff  
11 education and training on hand hygiene was delivered at three different times  
12 according to group number. **Scores for three assessment methods, an audit of  
13 hand hygiene facilities, staff hand hygiene observations, and an educational  
14 questionnaire, were collected before and after the intervention.** After each group  
15 of homes received the intervention, all participants were screened for MRSA nasal  
16 colonisation. **In total, four surveys took place between November 2006 and  
17 February 2009.**

18 **Results:** MRSA prevalence was 20%, 19%, 22% and 21% in each survey,  
19 respectively. There was a significant improvement in scores for all three assessment  
20 methods post-intervention ( $p \leq 0.001$ ). The intervention was associated with a small  
21 but significant increase in MRSA prevalence ( $p = 0.023$ ). MRSA colonisation was  
22 associated with previous and subsequent MRSA infection, but was not significantly  
23 associated with subsequent hospitalisation or mortality.

24 **Conclusions:** The intervention did not result in a decrease in the prevalence of MRSA  
25 colonisation in care home residents. Additional measures will be required to reduce

1  
2  
3  
4  
5  
6  
7  
8  
9  
10  
11  
12  
13  
14  
15  
16  
17  
18  
19  
20  
21  
22  
23  
24  
25  
26  
27  
28  
29  
30  
31  
32  
33  
34  
35  
36  
37  
38  
39  
40  
41  
42  
43  
44  
45  
46  
47  
48  
49  
50  
51  
52  
53  
54  
55  
56  
57  
58  
59  
60

1 endemic MRSA colonisation in care homes.

For peer review only



## 1 Introduction

2 Meticillin-resistant *Staphylococcus aureus* is a significant cause of mortality and  
3 morbidity in both healthcare and community settings.<sup>1,2</sup> Numerous surveillance  
4 schemes,<sup>3,4</sup> recommendations,<sup>5,6</sup> and guidelines<sup>7,8</sup> have been developed with the aim  
5 of reducing levels of MRSA infection associated with healthcare. In the UK, mandatory  
6 surveillance of cases of MRSA bacteraemia was introduced in all acute NHS Trusts in  
7 England in 2001.<sup>3</sup> Recently, levels of MRSA bacteraemia in hospitals have been  
8 decreasing markedly.<sup>9</sup>

9 The elderly population living in care homes often require frequent contact with  
10 healthcare. This situation, known as the 'revolving door' syndrome,<sup>10</sup> when residents  
11 are admitted to hospital and then discharged back into a care home, means that care  
12 home residents **are more likely to be** carriers of MRSA. Small studies in the UK  
13 during the 1990s identified levels of MRSA colonisation in care home residents  
14 between 0.8-17%.<sup>11-13</sup> More recently, our group<sup>14</sup> and Baldwin *et al.* (2009) reported  
15 that MRSA colonisation levels among residents in care homes in the UK were greater  
16 than 20%.<sup>15</sup> MRSA prevalence rates of greater than 36% have been reported in  
17 long-term care facilities in France and the USA.<sup>16,17</sup> There is a paucity of large-scale,  
18 longitudinal studies monitoring the occurrence of MRSA in the care home setting<sup>14,15</sup>  
19 and the assessment of health outcomes of residents colonised with MRSA are not  
20 commonly reported.

21 Guidance for infection control in care homes was issued by the Department of  
22 Health in 2006.<sup>8</sup> These guidelines comprised recommendations rather than statutory  
23 requirements, and were not specific for the control of MRSA. In a recent Care Quality  
24 Commission survey, however, 25% of participating care homes were not using the  
25 Department of Health guidance,<sup>8</sup> including specific requirements that all staff should  
26 receive training in infection prevention and control.<sup>10</sup> Most evidence for the

1 effectiveness of infection control strategies has been generated in the acute healthcare  
2 setting.<sup>7,18</sup> Although some infection prevention recommendations designed for acute  
3 healthcare may be applicable to other settings,<sup>7</sup> successful translation to the care home  
4 environment cannot be assumed.<sup>10</sup> During compilation of a Cochrane review of  
5 infection control strategies for preventing MRSA transmission in nursing homes, no  
6 studies met the systematic selection criteria.<sup>18</sup> Robust data referring to strategies for  
7 preventing MRSA transmission in care homes are lacking, and studies are needed to  
8 test infection prevention interventions that are deliverable in the care home setting.<sup>18</sup>

9         The objectives of this study were to determine prospectively the prevalence and  
10 risk factors for MRSA colonisation in a large sample of elderly residents of care homes  
11 in Leeds Primary Care Trust (PCT), and to determine whether training and education of  
12 care home staff in the area of infection prevention, in particular hand hygiene, can  
13 minimise the risk of MRSA transmission. Health outcomes (rates of subsequent  
14 hospitalisation, infection and mortality) of residents according to MRSA colonisation  
15 were also examined.

16

## 1 **Methods**

### 2 **Setting**

3 According to the Care Standards Act (2000), a care home is defined as 'any  
4 home that provides accommodation, together with nursing or personal care, for any  
5 person who is, or has been ill, or is disabled or infirm'.<sup>19</sup> In the UK, all homes that meet  
6 the definition of a care home are registered with the Care Quality Commission (**CQC**),  
7 formerly known as the Commission for Social Care Inspection.<sup>20</sup> Care homes may be  
8 owned by the local authority or by independent providers. **A care home without  
9 nursing capability was defined as a home that provided residents with  
10 accommodation, social and personal care. A home with nursing capability was  
11 defined as a home that employed registered nurses and provided nursing care in  
12 addition to accommodation, social and personal care to residents. Care homes  
13 with nursing capability were listed on the CQC register as a nursing home. All  
14 care homes, with 20 or more beds, registered in Leeds, UK were eligible to take part in  
15 the study, excluding those that provided care for people with mental, physical or  
16 learning disabilities. Ninety of the 186 registered care homes met the study criteria and  
17 were invited to participate. Leeds Teaching Hospitals Trust (LTHT) was the main acute  
18 care provider for all the care homes included in the study.**

### 19 **Data collection**

20 Each participating care home was given a unique identifying number and was  
21 anonymised to laboratory staff. Details such as home owner, number of beds, and  
22 whether or not a home had nursing capability were recorded for each home. Each  
23 resident who was considered to be eligible to participate by the care home staff was  
24 verbally given information about the nature of the study. In the first instance, written  
25 consent was obtained, followed by verbal consent if the resident agreed to participate  
26 in subsequent surveys. The sampling process was anonymised, with no specific

1  
2  
3  
4 1 infection prevention interventions being initiated on the identification of a resident who  
5  
6 2 was colonised. At each survey the total number of residents present in the home and  
7  
8 3 the number of residents able to consent was collected by age and sex category. Data  
9  
10 4 pertaining to the age, sex and presence of an invasive device were collected per  
11  
12 5 participant, per survey.

13  
14  
15 6 Once the collection of swabs had been completed, further data were collected.  
16  
17 7 The Microbiology Laboratory Information Management System (LIMS) was used to  
18  
19 8 determine whether each resident had a record of clinical samples being sent for  
20  
21 9 microbiological investigation and whether or not MRSA had been isolated before or  
22  
23 10 after each survey. For the purposes of this study, MRSA infection was defined as a  
24  
25 11 record of MRSA isolated from any invasive sample type (*i.e.* blood culture, tissue,  
26  
27 12 bone, bronchoalveolar lavage) or MRSA isolated as pure culture from a non-invasive  
28  
29 13 sample type (*i.e.* swab, sputum, urine). MRSA colonisation was defined as a record of  
30  
31 14 MRSA isolated from a urine sample collected via a catheter, or MRSA isolated from a  
32  
33 15 non-invasive sample type in the presence of other bacteria. Data regarding contact  
34  
35 16 with healthcare facilities were collected using the Patient Administration System (PAS)  
36  
37 17 for LTHT. This included the total number of hospital days spent in LTHT during the 12  
38  
39 18 months before a screening swab was collected, and the number of hospital admissions  
40  
41 19 prior to this period. Any attendance at out-patient clinics was also recorded. All-cause  
42  
43 20 mortality data were collected both from PAS and from a database held by Leeds  
44  
45 21 Primary Care Trust.

## 46 47 48 22 **Study design**

49  
50 23 This study was a controlled before and after intervention study and followed a  
51  
52 24 stepped-wedge design (Table 1).<sup>21</sup> After an initial MRSA prevalence survey, care  
53  
54 25 homes were randomly allocated into three groups. Random allocation was stratified by  
55  
56 26 number of beds and baseline MRSA prevalence. Implementation of staff training and  
57  
58  
59  
60

1 education intervention was dependent on the group to which the home had been  
 2 allocated. Homes in Group One received the intervention between January-October  
 3 2007; homes in Group Two between November 2007-February 2008; and homes in  
 4 Group Three between July-September 2008. Scores for audits of hand hygiene  
 5 facilities, staff hand hygiene observations, and an educational questionnaire were  
 6 collected before and after the intervention.

7 **Table 1. Intervention schedules for stepped wedge design; “Pre” represents a**  
 8 **pre-intervention survey, “Post” represents surveys occurring post-intervention.**

|       | Survey/Period of Collection |              |              |              |
|-------|-----------------------------|--------------|--------------|--------------|
|       | 1                           | 2            | 3            | 4            |
| Group | Nov-Dec 2006                | Oct-Nov 2007 | May-Jun 2008 | Jan-Feb 2009 |
| 1     | Pre                         | Post         | Post         | Post         |
| 2     | Pre                         | Pre          | Post         | Post         |
| 3     | Pre                         | Pre          | Pre          | Post         |

### 9 **Intervention**

10 An intervention based on staff training and education on the topic of infection  
 11 prevention and effective hand hygiene was used to assess the effect on MRSA  
 12 prevalence. The intervention consisted of a structured session of education, combined  
 13 with two audits that assessed hand hygiene practice and facilities in the care home.  
 14 Scores for the educational questionnaire and for audit of hand hygiene facilities and  
 15 staff hand hygiene observations were collected before and after the training session.  
 16 Written feedback concerning the results of the audits that took place before the training

1 session was returned to each home. Specific suggestions for improvement were  
2 included when necessary.

3           The education session, lead by an Infection Control Nurse employed by Leeds  
4 PCT, lasted approximately 45 minutes, and was delivered using a Microsoft Office  
5 PowerPoint presentation with strictly controlled content. Topics included how and  
6 when to wash hands and barriers to effective hand washing. The use of alcohol gel  
7 and personal protective equipment were also included. A DVD outlining correct hand  
8 hygiene procedures was shown during the training. Attendees participated in a  
9 practical demonstration of good hand hygiene technique by using hand cream  
10 containing ultra-violet responsive particles and a UV light box. A questionnaire  
11 comprising 12 short answer questions was completed, directly before (pre-) and after  
12 (post-) the educational session, by personnel who attended the training. Approximately  
13 four weeks after the training was completed, three members of staff were chosen at  
14 random to complete the same questionnaire; this is referred to as the extended-time  
15 questionnaire. The same materials and session format were used for all intervention  
16 groups. The study aimed to deliver the educational input to at least 80% of the  
17 whole-time equivalent (WTE) staff.

18           An audit of the hand hygiene practice and facilities was carried out for each  
19 home at the beginning of the relevant intervention period, using an audit tool from the  
20 Infection Control Nurses Association.<sup>22</sup> Issues such as staff education, compliance  
21 with requirements relating to uniform policy, and provision of liquid soap and paper  
22 towels were assessed. The same audit was carried out after written feedback had  
23 been given to the home. The Lewisham hand hygiene assessment tool<sup>23</sup> was used to  
24 perform observational audits of hand hygiene practice before and, a minimum of four  
25 weeks, after the educational input for each intervention group. During each of these  
26 audits, three care home staff members, selected at random, were shadowed for a

1 period of 20 minutes each. A comparison between the number of times hand  
2 decontamination occurred *versus* the number of hand washing opportunities arising  
3 was determined to give a percentage figure for compliance.

#### 4 **Statistical analysis**

5 Statistical analysis was carried out using Stata data analysis and statistical  
6 software (StataCorp, Texas, USA). Chi-squared tests were used to compare resident  
7 and care home characteristics. Descriptive statistics were used to compare home  
8 characteristics between the three groups into which homes were allocated and to  
9 compare those homes participating in the study to those not consenting to take part.  
10 Chi-squared tests were used to compare proportions, t-tests for comparing continuous  
11 variables between two groups and ANOVA for comparing continuous data between  
12 more than two groups. Analytical approaches used in stepped-wedge designs are  
13 susceptible to separate time trends within subgroups;<sup>21</sup> therefore, the presence of a  
14 significant time trend within subgroups of care homes and residents was investigated.  
15 The impact of the intervention was then investigated using a random effects logistic  
16 regression model controlling for resident characteristics and subgroup by time trend  
17 interactions. A  $\chi^2$  test was used to compared hand hygiene proportions and a t-test to  
18 compare educational scores. Scores from the audit of hand hygiene facilities were not  
19 normally distributed and a Wilcoxon signed rank test was used for comparison. To  
20 investigate whether being identified with an infection was associated with prior MRSA  
21 carriage, survival analysis was performed using a Cox proportional hazards model.  
22 Residents that had a record of an MRSA infection prior to entering the study were  
23 excluded from this analysis. The analysis investigated the time from the resident  
24 entering the survey to the time of identification of an MRSA infection or until the  
25 09/08/2009. A random effects logistic regression model was used to assess whether

1 mortality was associated with prior MRSA carriage. For all analyses, statistical  
2 significance was defined as  $p < 0.05$ .

### 3 **Microbiological methods**

4 Amies' Transport swabs (Barloworld Scientific, Stone, Staffordshire, UK) were  
5 used to sample the anterior nares of consenting residents during four periods:  
6 16<sup>th</sup> November 2006-13<sup>th</sup> December 2006 (Survey One); 1<sup>st</sup> October  
7 2007-12<sup>th</sup> November 2007 (Survey Two); 1<sup>st</sup> May 2008-26<sup>th</sup> June 2008 (Survey Three)  
8 and 5<sup>th</sup> January-12<sup>th</sup> February 2009 (Survey Four). Each swab was used to inoculate a  
9 single MRSA Select agar plate (Bio-Rad, Marnes la Coquette, France), which was  
10 incubated for 18-24 hours at 37°C. Bright, fuchsia-pink colonies were considered  
11 presumptive MRSA. Presumptive MRSA colonies were confirmed to be *S. aureus* by  
12 DNase agar testing and positive agglutination reaction using the Pastorex™ Staph plus  
13 kit (Bio-Rad, Marnes la Coquette, France). Meticillin resistance was confirmed by  
14 breakpoint susceptibility testing using Iso-Sensitest agar (Oxoid, Basingstoke,  
15 Hampshire, UK) supplemented with 4 mg/L, 8 mg/L and 12 mg/L methicillin,  
16 respectively (Medical Wire and Equipment Co. Ltd., Corsham, Wiltshire, UK) or 4 mg/L  
17 cefoxitin (Mast Diagnostics, Bootle, Merseyside, UK). Isolates that had an equivocal  
18 methicillin susceptibility result by breakpoint method were analysed further using the  
19 Mastalex™ MRSA kit (MAST Diagnostics, Bootle, Merseyside, UK).  
20 Meticillin-susceptible *S. aureus* strain NCTC 6571 and MRSA strain NCTC 10442 were  
21 used as control organisms.

22



## 1 Results

### 2 Participating Care Homes

3 Of the 90 homes that were invited, 68 homes participated in the first part of the  
 4 study. There was no significant difference in the homes taking part and those that  
 5 refused in terms of the number of residents ( $p = 0.15$ , t-test), the proportion with  
 6 nursing capability ( $p = 0.62$ ,  $\chi^2$ ) or the proportion that were owned by the local authority  
 7 ( $p = 0.18$ ,  $\chi^2$ ). After the initial survey, the 68 homes that participated were randomly  
 8 allocated into three groups. The number of homes that were in each group and their  
 9 characteristics are shown in Table 2.

10 **Table 2. Home characteristics according to Intervention Group.**

|                                    | Group |    |    |
|------------------------------------|-------|----|----|
|                                    | 1     | 2  | 3  |
| Total Homes (n)                    | 28    | 18 | 22 |
| Mean number of places per home (n) | 44    | 39 | 42 |
| Homes with nursing capability (n)  | 14    | 8  | 10 |
| Local authority homes (n)          | 8     | 1  | 6  |

11 There was no significant difference between homes allocated to different  
 12 intervention groups with respect to the number of homes that provided nursing care  
 13 ( $p = 0.9$ ,  $\chi^2$ ), the mean number of beds per home ( $p = 0.6$ , ANOVA), and the owner of  
 14 the home ( $p = 0.12$ ,  $\chi^2$ ). There were no significant differences in mean age ( $p = 0.9$ ,  
 15 ANOVA), sex distribution ( $p = 0.4$ ,  $\chi^2$ ) or overall number of residents ( $p = 0.43$ , t-test)  
 16 between the three intervention groups; however, there were fewer residents in homes

1 owned by the local authority in Group Two. Following the first survey, two homes  
2 withdrew from the study leaving 66 homes in the second survey. A further home  
3 withdrew following Survey Two leaving 65 homes in Surveys Three and Four. The  
4 following analyses report data from those homes that participated in all four surveys.

5 The 65 homes that participated in all four surveys had 2772 beds. Fourteen  
6 homes were operated by the local authority, none of which had nursing capability  
7 (n = 463 beds; range 20-40; mean 33). Fifty one homes were owned by independent  
8 providers (n = 2309 beds; range 20-180; mean 44); 31 homes (n = 1648 beds) had  
9 nursing capability. Homes with nursing capability comprised 48% (n = 30) of the  
10 homes in this study and housed 59% (n = 1621) of the beds.

#### 11 **Participating residents and swabs collected**

12 In total, 4327 swabs were collected; 1210 from Survey One, 1067 from Survey  
13 Two, 1023 from Survey Three and 1027 from Survey Four. Two swabs were removed  
14 from Survey Four due to participant duplication (n = 1) and incomplete data, leaving  
15 4325 swabs suitable for analysis. The number of swabs collected from individual care  
16 homes during any survey ranged from 5-93. On average, 46% of residents that were  
17 present in homes at the time of a survey were swabbed (*i.e.* able to provide consent  
18 and available for swabbing).

19 The study included 2492 residents. The majority (n = 1405, 56%) of residents  
20 participated in a single survey, 550 (22%) participated in two surveys, 328 (13%) in  
21 three surveys and 209 (8%) participated in all four surveys. The majority (n = 1404) of  
22 residents had been admitted to hospital within the 12 months before being included in  
23 the study. Of those that did not have a record of hospital admission within 12 months  
24 of being sampled, 664 had a record of previous hospital admission according to LTHT  
25 PAS. There were 424 (17%) residents that had no record of hospital admission to  
26 LTHT; however 154 of these had a record of contact with out-patient clinics. There

1 were 270 residents that did not have any record of contact with healthcare; of these,  
2 18% were found to be MRSA positive in at least one survey. The corresponding  
3 proportion for those who had had healthcare contact was 28% ( $p < 0.001$ ).

#### 4 **Staff knowledge and behaviour**

5 There were significant improvements in the mean scores for staff knowledge  
6 following the intervention; 71%, scores after education vs. 43% before education  
7 ( $p < 0.001$ , t-test). The mean knowledge score achieved at the extended-time  
8 questionnaire was 57% (vs. baseline  $p < 0.001$ , t-test). There were significant  
9 improvements in the mean scores following the intervention for the audit of hand  
10 hygiene facilities (85% post-intervention vs. 69% pre-intervention;  $p < 0.001$ , Wilcoxon  
11 signed rank test) and observations of hand hygiene (82% of 455 opportunities after the  
12 intervention vs. 58% of 568 opportunities before;  $p < 0.001$ ,  $\chi^2$  test).

#### 13 **MRSA colonisation**

14 A total of 888 swabs (21%) of anterior nares were MRSA positive; this  
15 comprised 238 participants in Survey One (20%); 204 in Survey Two (19%); 228 in  
16 Survey Three (22%), and 218 in Survey Four (21%). The prevalence of MRSA  
17 colonisation in residents within individual homes ranged from 0-60%. One home, a  
18 privately owned care home without nursing capability ( $n = 24$  beds), with 21  
19 participants, did not have any residents with nasal colonisation with MRSA identified in  
20 any of the four surveys. There was no significant difference in prevalence of MRSA  
21 between surveys ( $p = 0.28$ ,  $\chi^2$ ) and there was no significant trend in MRSA prevalence  
22 overall ( $p = 0.15$ , ANOVA) across the four surveys. When other factors were controlled  
23 for (age, sex, hospital admissions, invasive devices), however, a significant increase in  
24 MRSA colonisation across the four surveys was identified (OR = 1.08,  $p = 0.031$ ,  
25 logistic regression). In order to identify factors associated with the increasing trend,  
26 subgroup analyses (homes with nursing capability, privately owned homes or large

1 homes (>35 beds) were performed. The increase in MRSA prevalence remained  
2 significant in homes with nursing capability (OR = 1.61, 95% CI 1.15-2.26,  $p = 0.006$ ,  
3 logistic regression) and for residents in the >90 years age group (OR = 1.14,  $p = 0.044$ ,  
4 logistic regression). Both trends were taken into account during multivariate analysis.

5 Multivariate analysis of risk factors for MRSA colonisation in residents showed  
6 that the intervention was associated with a small but significant increase in prevalence  
7 of MRSA ( $p = 0.02$ , logistic regression) (Table 3). Overall, MRSA prevalence prior to  
8 the intervention was 18.6%, which increased to 22.4% after the intervention. When  
9 analysed according to Group, there was a significant difference between MRSA  
10 prevalence before and after the intervention in Groups Two ( $p = 0.04$ ,  $\chi^2$ ) and Three  
11 ( $p = 0.02$ ,  $\chi^2$ ) but not in Group One ( $p = 0.44$ ,  $\chi^2$ ) (Figure 1). The significant increase in  
12 prevalence occurred in the survey directly after the intervention but was not sustained  
13 in the group that had follow-up (Figure 1). The following factors were also significantly  
14 associated with MRSA colonisation: the number of hospital admissions in the last  
15 12 months, the total number of days a participant spent in hospital in the 12 months  
16 before sampling, male sex, and having a record of an MRSA infection prior to entering  
17 the study (Table 3).

18 To investigate the increase in MRSA prevalence occurring after the  
19 intervention, care homes with and without nursing capability were analysed separately  
20 with controls (Table 3). This analysis showed that the intervention was no longer  
21 associated with an increase in MRSA prevalence in homes with nursing capability  
22 ( $p = 0.159$ , logistic regression); however, in care homes without nursing capability the  
23 intervention remained significantly associated with an increase in MRSA prevalence  
24 ( $p = 0.034$ , logistic regression). When the same analysis was performed only including  
25 participants who were present in at least two surveys ( $n = 1087$ ), the intervention  
26 remained associated with an increase in MRSA prevalence in both care homes with

- 1 nursing capability (OR = 2.07, 95% CI 1.22-3.52,  $p = 0.007$ , logistic regression) and
- 2 those without (OR = 2.55, 95% CI 1.3-4.97,  $p = 0.006$ , logistic regression).

For peer review only

1 **Table 3. Logistic regression of risk factors for colonisation with meticillin-resistant *Staphylococcus aureus* (MRSA) among 2492**  
 2 **residents of care homes in Leeds, United Kingdom, according to care home capability**

| Risk factor                                          | Comparison group           | Overall |           |          | Care home                  |           |          |                         |           |          |
|------------------------------------------------------|----------------------------|---------|-----------|----------|----------------------------|-----------|----------|-------------------------|-----------|----------|
|                                                      |                            | OR      | CI        | <i>p</i> | Without nursing capability |           |          | With nursing capability |           |          |
|                                                      |                            | OR      | CI        | <i>p</i> | OR                         | CI        | <i>p</i> | OR                      | CI        | <i>p</i> |
| After intervention                                   | No intervention            | 1.36    | 1.04-1.79 | 0.02     | 1.61                       | 1.03-2.52 | 0.034    | 1.26                    | 0.91-1.75 | 0.159    |
| No. of hospital admissions in the last 12 months     | -                          | 1.18    | 1.11-1.26 | <0.001   | 1.23                       | 1.11-1.36 | <0.001   | 1.14                    | 1.05-1.24 | 0.001    |
| No. of hospital admission days in the last 12 months | -                          | 1.00    | 1.00-1.00 | 0.001    | 1.00                       | 1.00-1.01 | 0.046    | 1.00                    | 1.00-1.00 | 0.006    |
| Presence of an invasive device                       | Absence of invasive device | 2.36    | 1.70-3.29 | <0.001   | 1.81                       | 0.86-3.82 | 0.116    | 2.46                    | 1.70-3.56 | <0.001   |
| Record of MRSA infection prior to study              | No previous record         | 2.12    | 1.49-3.02 | <0.001   | 3.73                       | 1.78-7.82 | <0.001   | 1.78                    | 1.19-2.65 | 0.005    |
| Age 80-89 years                                      | <80 years                  | 1.13    | 0.92-1.39 | 0.24     | 1.14                       | 0.80-1.64 | 0.454    | 1.15                    | 0.90-1.48 | 0.246    |
| Age 90+ years                                        | <80 years                  | 1.29    | 0.94-1.78 | 0.11     | 1.54                       | 0.91-2.6  | 0.101    | 1.13                    | 0.75-1.7  | 0.537    |
| Male                                                 | Female                     | 1.48    | 1.24-1.78 | <0.001   | 1.37                       | 1.0-1.87  | 0.042    | 1.55                    | 1.25-1.93 | <0.001   |

3 Key: OR, odds ratio; CI, 95% confidence interval.

2 Residents were followed for a median 21 months to determine MRSA infection  
BMJ Open  
3 and survival outcomes. The length of follow-up varied significantly according to the  
4 survey in which the resident participated; residents in the first survey had a possible  
5 follow-up of 33 months compared with those in the last survey, who had possible  
6 follow-up of six months. Hospital admission data in the period 12 months after the date  
7 of colonisation were collected for residents that participated in Survey One (n = 1210).  
8 The relative risk for hospitalisation within 12 months of the date of colonisation was  
9 1.27 ( $p > 0.05$ ). Subsequent infection with MRSA was significantly associated with prior  
10 MRSA colonisation when other factors were controlled for (OR = 2.5, 95%  
11 CI = 1.2-5.24,  $p = 0.014$ , Cox proportional hazards model) (Table 4). Of the 2492  
12 residents included in the study, 90 residents were recorded as having an MRSA  
13 infection prior to entering the study, leaving 2442 suitable for further analysis. The  
14 majority (n = 1800) of residents were not colonised with MRSA and had no record of an  
15 MRSA infection. There were 612 residents who were colonised with MRSA but had no  
16 record of MRSA infection, 16 residents had no MRSA colonisation and had a  
17 subsequent record of an MRSA infection, and 14 residents were identified with  
18 colonisation and had subsequently developed an MRSA infection. Eight residents had  
19 a record of MRSA bacteraemia. Two percent of residents colonised with MRSA had a  
20 record of MRSA infection subsequent to a survey, compared with 0.9% for those  
21 residents without MRSA colonisation ( $p = 0.008$ ,  $\chi^2$ ). Death was recorded for 897 of  
22 the 2492 residents that participated. Colonisation with MRSA was not significantly  
23 associated with mortality (OR = 1.16, 95% CI 0.95-1.41,  $p = 1.32$ , logistic regression);  
24 however, mortality was significantly associated with advanced age, male sex, the  
25 presence of an invasive device, and the number of hospital admissions within 12

2 entering the study to either MRSA infection or 09/08/2009, whichever occurred  
 3 **BMJ Open**  
 3 **first and b) logistic regression model of mortality associated with prior MRSA**  
 4 **carriage**

| Risk factor                                          | MRSA infection <sup>a</sup> |           |          | Mortality <sup>b</sup> |           |          |
|------------------------------------------------------|-----------------------------|-----------|----------|------------------------|-----------|----------|
|                                                      | Hazard Ratio                | CI        | <i>p</i> | OR                     | CI        | <i>p</i> |
| MRSA colonisation during study                       | 2.51                        | 1.2-5.24  | 0.014    | 1.16                   | 0.95-1.41 | 0.132    |
| Age                                                  | 1.00                        | 0.96-1.05 | 0.728    | 1.04                   | 1.03-1.05 | <0.001   |
| Male                                                 | 1.41                        | 0.65-3.08 | 0.377    | 1.39                   | 1.14-1.69 | 0.001    |
| Presence of an invasive device                       | 0.67                        | 0.09-5.02 | 0.701    | 5.45                   | 3.32-8.95 | <0.001   |
| No. of hospital admissions in the previous 12 months | 1.11                        | 0.92-1.34 | 0.244    | 1.06                   | 1.00-1.12 | 0.038    |

5 Key: OR, Odds ratio; CI, 95% confidence interval.



## 1 Discussion

2 To our knowledge, this is the largest prospective study that has monitored the  
3 level of nasal colonisation of MRSA in elderly residents of care homes in the UK. Sixty  
4 five homes and 2492 residents participated in the study which took place over a 28  
5 month period (November 2006-February 2009). The study included a large proportion  
6 of care homes in the area served by Leeds Primary Care Trust, including homes of  
7 different sizes (n = 20-180 beds), homes owned by the local authority and by  
8 independent providers, and homes with and without nursing capability. In total, 888  
9 MRSA isolates were identified from 4325 nasal swabs during the periods of screening  
10 stated. The mean level of MRSA colonisation was 20% (95% CI = 18-23%), which was  
11 higher than levels recorded during the 1990s but comparable to those reported recently  
12 (22-23%).<sup>14;17</sup> Interestingly, a recent survey of 748 residents in 51 care homes in  
13 Gloucestershire and Bristol found that only 7.9% residents were positive for MRSA by  
14 nasal screening, indicating marked geographical variation in MRSA prevalence in care  
15 homes.<sup>24</sup>

16 The health outcomes of residents are not commonly included in studies of  
17 MRSA prevalence in the care home.<sup>17;25;26</sup> The findings of the present study support  
18 the hypothesis that although MRSA infections in the care home setting are infrequent,  
19 colonised residents have an increased risk of developing an infection.<sup>15;27</sup> MRSA  
20 colonisation was associated with previous and subsequent MRSA infection; residents  
21 colonised with MRSA were two and a half times more likely to develop a MRSA  
22 infection than non-carriers. Notably, however, MRSA colonisation was not significantly  
23 associated with mortality in a logistic regression model, a finding which has been  
24 reported by others, albeit in a lower prevalence setting.<sup>28</sup>

25 The intervention applied in the present study was intended to improve  
26 awareness of good practice and knowledge of infection control in care homes, with an

1 emphasis on hand hygiene. The present study assessed the infection prevention  
2 knowledge of over 1000 members of staff and the infection prevention practice of more  
3 than 300 individuals. The stepped-wedge design allowed measurement of MRSA  
4 prevalence before the intervention, directly after the intervention, and further follow-up  
5 in two out of three study groups. Participating residents and staff in each group of  
6 homes acted as controls for each other. Three established methods were used to  
7 measure staff knowledge and behaviour following the intervention and scores improved  
8 after the intervention for all three assessments.

9 Overall, no significant difference in MRSA prevalence was identified during the  
10 survey periods. Directly following the intervention, however, there was a significant  
11 increase in MRSA prevalence, although this returned to baseline levels in one group  
12 that had follow-up. Stepped-wedge designs are particularly susceptible to trends within  
13 subgroups, but when the subgroups were adjusted for linear trends, the increase in  
14 MRSA prevalence after the intervention remained significant. It is possible that other  
15 confounding factors resulted in a non-linear trend in MRSA prevalence in certain  
16 homes. It has not been possible to identify or control for these factors. MRSA  
17 infections are unlikely to be independent events and a cluster of MRSA cases may  
18 explain temporary increases in prevalence following the intervention in some homes.

19 **Leeds Teaching Hospitals Trust (LTHT) was the main acute care provider for all**  
20 **the homes in the study. The small increase in MRSA prevalence following the**  
21 **intervention is unlikely to relate to the extent of MRSA infection in LTHT as**  
22 **during the period of the study, there was a decreasing trend in the MRSA**  
23 **bacteraemia rates reported by LTHT.<sup>3</sup>**

24 Other studies have used a similar intervention strategy in care homes.<sup>29-31</sup> A  
25 study based in Taiwan introduced a programme of hand hygiene training into three  
26 care homes and identified significant improvements in scores for staff knowledge and

1  
2  
3  
4 1 behaviour after the training; difference between hand hygiene knowledge pre- and  
5  
6 2 post-intervention,  $p < 0.001$ ; difference between hand hygiene observations pre-and  
7  
8 3 post-intervention,  $p = 0.001$ .<sup>30</sup> Although no direct measure of microbiological outcome  
9  
10 4 was included, rates of infection based on the total number of urinary tract infections,  
11  
12 5 lower respiratory infections and rates of influenza recorded by each facility, were  
13  
14 6 significantly lower following the intervention (1.52%) compared with rates recorded for  
15  
16 7 two periods before the intervention; December 2004-February 2005 (1.74%) and  
17  
18 8 June-August 2005 (2.04%) ( $p < 0.001$ ).

19  
20 9       Around the same time as the present study, Baldwin *et al.* (2010) implemented  
21  
22 10 an infection control education and training programme in nursing homes in the Belfast  
23  
24 11 area of Northern Ireland.<sup>29</sup> The study screened 793 residents and 338 members of  
25  
26 12 staff for MRSA colonisation. The education programme, occurring at baseline and at  
27  
28 13 three and six months, consisted of multiple training sessions for staff. An existing  
29  
30 14 member of staff in each intervention home was assigned the role of infection control  
31  
32 15 link worker, the role of which was to reinforce good infection control practice in the  
33  
34 16 home. Practice was observed and recorded, with feedback, for an audit of ten  
35  
36 17 specified infection control standards involving the following subject areas: cleanliness,  
37  
38 18 decontamination (hand and environment), waste management, personal protective  
39  
40 19 equipment and the management of wounds, urinary catheters and enteral feeding.  
41  
42 20 Using a cluster randomised controlled study design, audit scores and MRSA  
43  
44 21 colonisation of residents and staff were compared for homes in the intervention group  
45  
46 22 ( $n = 16$ ) with those homes in the control group ( $n = 16$ ); homes in the control group did  
47  
48 23 not receive training or feedback. While scores for the infection control audits  
49  
50 24 significantly improved in eight of the ten standards (82% vs. 64% in intervention and  
51  
52 25 control homes, respectively,  $p < 0.0001$ ), levels of MRSA colonisation did not change  
53  
54 26 over the 12 month study period in either residents or staff.  
55  
56  
57  
58  
59  
60

1  
2  
3  
4 1 In contrast, Gopal *et al.* (2009) evaluated whether enhanced infection control  
5  
6 2 support in nursing homes had an impact on improving infection control practice.<sup>31</sup> The  
7  
8 3 intervention included extensive support from a dedicated infection control team,  
9  
10 4 including an infection control nurse, infection control nurse specialist and an infection  
11  
12 5 control doctor. Twelve homes were included in the study and were divided into two  
13  
14 6 groups of six, an intervention group and a control group, based on the number of  
15  
16 7 residents. The study found no statistical difference between the control group and the  
17  
18 8 group of homes that received the intervention at baseline and final assessment for  
19  
20 9 hand hygiene facilities ( $p = 0.69$ ), environmental cleanliness ( $p = 0.43$ ) and disposal of  
21  
22 10 clinical waste ( $p = 0.96$ ). There was no microbiological investigation included in this  
23  
24 11 evaluation.

25  
26  
27 12 In principle, the intervention applied in the present study was plausible and  
28  
29 13 unlikely to be harmful. The assessments were reasonable, albeit focussed on  
30  
31 14 short-term effects; however, the following limitations of the study must be  
32  
33 15 acknowledged. It is likely that the prevalence reported here is an underestimation of  
34  
35 16 the true level of MRSA colonisation because of the use of nasal screening alone. To  
36  
37 17 achieve a high-level of sensitivity of detection (>90%) of MRSA carriers, multiple sites  
38  
39 18 (e.g. axilla, groin, nose and throat) need to be screened.<sup>32,33</sup> Screening urethral  
40  
41 19 catheters, legs ulcers and pressure sores would have increased the sensitivity of  
42  
43 20 MRSA detection and may have provided further information regarding the infection  
44  
45 21 status of the resident. Although pooling swabs from multiple sites could have been  
46  
47 22 done at the same cost, screening the anterior nares as a single site using chromagar  
48  
49 23 as a growth medium was a compromise, taking into account the difficulties of obtaining  
50  
51 24 consent and practical issues associated with more extensive sampling of a  
52  
53 25 predominantly frail, elderly population and the need for a cost-effective approach.

54  
55 26 **Participation of residents was voluntary and on average 46% of the residents**  
56  
57  
58  
59  
60

1 were tested for MRSA colonisation. Reasons for non-participation of residents  
2 were not collected; care homes for people with dementia were not specifically  
3 excluded from the study, but residents with dementia were excluded. It is  
4 acknowledged that residents who were not considered eligible to participate due  
5 to their level of dependency may be at a greater risk of MRSA colonisation.

6 Other potentially informative data were not collected. For example, the  
7 type of room available per resident (*i.e.* single, shared, en-suite), local cleaning  
8 policies (routine and incident-related), laundry provision, and the uniform policy  
9 of the home would have provided a fuller description of the care home setting.  
10 Staff turnover in each care home was assessed at baseline, but more frequent  
11 data collection may have enabled a better assessment of the effect of the  
12 intervention. We did not collect information about length of stay of each  
13 resident, movement of individuals between homes, which we understand is  
14 uncommon, the number of admissions per home, and sources of admission (*i.e.*  
15 own home, hospital, other care home).

16 The study aimed to deliver educational input to at least 80% whole-time  
17 equivalent staff, which was achieved in 32% of the homes. Resources were  
18 available to provide each home with a maximum of three educational sessions,  
19 although exceptions were made for those homes with >100 beds. Availability of  
20 care home staff due to work demands or sickness, and closure of homes due to  
21 outbreaks of norovirus were reasons for not achieving the educational target in  
22 some homes. Such issues highlight the operational barriers to infection  
23 prevention measures, especially those that require behavioural change.

24

1  
2  
3  
4 1           **Other challenges to a study of this design include the requirement for**  
5  
6 2           **ethical approval, which may result in the inability to screen residents who cannot**  
7  
8 3           **give consent, and the need to maintain the anonymity of participating residents**  
9  
10 4           **and staff. Limited resources, home ownership, lack of isolation facilities, the**  
11  
12 5           **high throughput of employees and a high resident-to-carer ratio may influence**  
13  
14 6           **the effectiveness of infection control strategies in care homes.<sup>18, 34</sup> In the**  
15  
16 7           **absence of mandatory requirements relating to infection control in care homes, it**  
17  
18 8           **may be difficult to implement infection prevention strategies in the primary care**  
19  
20 9           **setting.**

21  
22  
23 10           Although observational methods of assessing hand hygiene compliance are  
24  
25 11           considered the gold standard,<sup>35</sup> increased productivity due to observation, known as  
26  
27 12           the Hawthorne effect, must be considered.<sup>36,37</sup> Despite long-term microbiological  
28  
29 13           follow-up (8-25 months), the duration of follow-up with regards to staff knowledge and  
30  
31 14           behaviour remained short (approximately four weeks). While the anonymous design of  
32  
33 15           the present study kept assessment of the intervention informal, it did not enable the  
34  
35 16           long-term follow-up of knowledge and practice in individual staff.

36  
37  
38 17           The intervention applied in the present study focused on a particular area of  
39  
40 18           infection prevention, that of hand hygiene, skin care and personal protective  
41  
42 19           equipment. Hand hygiene is considered to be an educational priority; however, there is  
43  
44 20           little evidence to suggest that improvements in hand hygiene alone result in a  
45  
46 21           significant reduction in MRSA infection or colonisation.<sup>38</sup> **Clearly, hand hygiene may**  
47  
48 22           **still be beneficial, and without emphasis on such practice it is plausible that**  
49  
50 23           **transmission of MRSA and other pathogens would increase. Reinforcement of**  
51  
52 24           **message and/or use cognitive behavioural theory could be explored to optimise**  
53  
54 25           **hand hygiene and thus its effectiveness.** Additional educational topics may include  
55  
56 26           risk factors for infection and how to identify residents at risk, care of wounds and  
57  
58  
59  
60

1  
2  
3  
4 1 invasive devices, and education about the judicious use of antibiotics.<sup>39</sup>  
5  
6 2 Implementation of an intervention in a setting such as that of the care home, which  
7  
8 3 experiences a high level of change, in terms of employee and resident throughput,  
9  
10 4 cannot be expected to last long-term without regular input. A single session of  
11  
12 5 education per staff member is unlikely to make a large difference to long-term practice.  
13  
14 6 Alternative training and education strategies may include more frequent educational  
15  
16 7 sessions, with additional learning resources, such as e-learning. Others have reported,  
17  
18 8 however, that the introduction of multiple training sessions did not result in a decrease  
19  
20 9 in MRSA prevalence,<sup>29</sup> and care homes that had access to extensive infection control  
21  
22 10 support failed to show improvements in audit scores.<sup>31</sup>  
23  
24

25 11 The use of interventions that focus on screening and decolonisation of residents  
26  
27 12 and/or staff may reduce MRSA prevalence in care homes. Given the difficulty of  
28  
29 13 achieving MRSA decolonisation in individuals with multiple risk factors for persistence,  
30  
31 14 this would be a considerable undertaking, and may risk resistance selection. Control of  
32  
33 15 risk factors for MRSA colonisation, such as improved management of wounds and  
34  
35 16 invasive devices may be beneficial.<sup>39</sup> Evaluation would be required to assess the cost  
36  
37 17 *versus* benefit of interventions involving screening and decolonisation in the care home  
38  
39 18 setting, along with consideration about the source of funding if such approaches were  
40  
41 19 to be recommended,<sup>40,41</sup> Given the large recent and continuing decreases in incidence  
42  
43 20 of invasive MRSA infection in England,<sup>9</sup> it remains possible that control measures in  
44  
45 21 the secondary care setting will lead to reduced MRSA carriage in care home residents.  
46  
47

## 48 **Conclusion**

49  
50 23 These results reinforce previous reports of high MRSA colonisation rates in  
51  
52 24 elderly residents of care homes. The intervention applied in the present study  
53  
54 25 improved staff practice and knowledge but did not reduce MRSA prevalence in  
55  
56 26 residents. These data provide an important baseline for future surveillance of MRSA in  
57  
58  
59  
60

1  
2  
3  
4 1 the care home setting. Further work is needed regarding screening, decolonisation  
5  
6 2 and re-entry to the care home and continued surveillance is needed to understand the  
7  
8 3 interaction between MRSA in care homes and hospitals. **Clear policy decisions need**  
9  
10 4 **to be made about how to manage with the burden of MRSA colonisation in care**  
11  
12 5 **home residents. The high burden of MRSA in residents has implications for**  
13  
14 6 **other healthcare institutions who manage these individuals. Admission**  
15  
16 7 **arrangements (isolation/screening, etc) of care home residents may need to be**  
17  
18 8 **adjusted to take account the risk of MRSA colonisation for individuals.**  
19  
20 9 **Reducing MRSA infection and possibly colonisation in hospital patients may in**  
21  
22 10 **turn affect the prevalence of MRSA in care home residents.**  
23  
24  
25  
26  
27  
28  
29  
30  
31  
32  
33  
34  
35  
36  
37  
38  
39  
40  
41  
42  
43  
44  
45  
46  
47  
48  
49  
50  
51  
52  
53  
54  
55  
56  
57  
58  
59  
60



## References

- 1 Gardam M. Is methicillin-resistant *Staphylococcus aureus* an emerging community pathogen? A review of the literature. *Can J Infect Dis* 2000;11:202-211.
- 2 Grundmann H, Aires-de-Sousa M, Boyce J et al. Emergence and resurgence of methicillin-resistant *Staphylococcus aureus* as a public-health threat. *Lancet* 2006;368:874-885.
- 3 Health Protection Agency. Mandatory *Staphylococcus aureus* bacteraemia surveillance scheme. 2009.  
<http://www.hpa.org.uk/HPA/Topics/InfectiousDiseases/InfectionsAZ/1191942169773/>.
- 4 Hope R, Livermore DM, Brick G et al. Non-susceptibility trends among staphylococci from bacteraemias in the UK and Ireland, 2001-06. *J Antimicrob Chemother* 2008;62, Suppl 2:ii65-ii74.
- 5 Department of Health. Bloodborne MRSA infection rates to be halved by 2008. 2004.  
[http://www.dh.gov.uk/en/Publicationsandstatistics/Pressreleases/DH\\_4093533](http://www.dh.gov.uk/en/Publicationsandstatistics/Pressreleases/DH_4093533).
- 6 Department of Health. Screening for methicillin-resistant *Staphylococcus aureus* (MRSA) colonisation: a strategy for NHS trusts - a summary of best practice. 2006. 10-11-2009.
- 7 Coia JE, Duckworth GJ, Edwards DI et al. Guidelines for the control and prevention of methicillin-resistant *Staphylococcus aureus* (MRSA) in healthcare facilities. *J Hosp Infect* 2006;63, Suppl 1:S1-44.

- 1  
2  
3  
4 1 8 Department of Health. Infection control guidance for care homes. 2006. London,  
5  
6 2 England, Department of Health.  
7  
8  
9 3 9 Health Protection Agency. Quarterly Epidemiological Commentary: Mandatory  
10  
11 4 MRSA bacteraemia & *Clostridium difficile* infection (October 2007 to December  
12  
13 5 2009). 2010. [http://www.hpa.org.uk/web/HPAwebFile/HPAweb\\_C/1267551242367](http://www.hpa.org.uk/web/HPAwebFile/HPAweb_C/1267551242367).  
14  
15  
16 6 10 Care Quality Commission. Working together to prevent and control infections. 2009.  
17  
18 7 [http://www.cqc.org.uk/db/documents/Working\\_together\\_to\\_prevent\\_and\\_control](http://www.cqc.org.uk/db/documents/Working_together_to_prevent_and_control_infections.pdf)  
19  
20 8 [infections.pdf](http://www.cqc.org.uk/db/documents/Working_together_to_prevent_and_control_infections.pdf).  
21  
22  
23 9 11 Cox RA, Bowie PE. Methicillin-resistant *Staphylococcus aureus* colonization in  
24  
25 10 nursing home residents: a prevalence study in Northamptonshire. *J Hosp Infect*  
26  
27 11 1999;43:115-122.  
28  
29  
30 12 12 Fraise AP, Mitchell K, O'Brien SJ et al. Methicillin-resistant *Staphylococcus aureus*  
31  
32 13 (MRSA) in nursing homes in a major UK city: an anonymized point prevalence  
33  
34 14 survey. *Epidemiol Infect* 1997;118:1-5.  
35  
36  
37 15 13 Namnyak S, Adhami Z, Wilmore M et al. Methicillin-resistant *Staphylococcus*  
38  
39 16 *aureus*: a questionnaire and microbiological survey of nursing and residential  
40  
41 17 homes in Barking, Havering and Brentwood. *J Infect* 1998;36:67-72.  
42  
43  
44 18 14 Barr B, Wilcox MH, Brady A et al. Prevalence of methicillin-resistant  
45  
46 19 *Staphylococcus aureus* colonization among older residents of care homes in the  
47  
48 20 United Kingdom. *Infect Control Hosp Epidemiol* 2007;28:853-859.  
49  
50  
51 21 15 Baldwin NS, Gilpin DF, Hughes CM et al. Prevalence of methicillin-resistant  
52  
53 22 *Staphylococcus aureus* colonization in residents and staff in nursing homes in  
54  
55 23 Northern Ireland. *J Am Geriatr Soc* 2009;57:620-626.  
56  
57  
58  
59  
60

- 1  
2  
3  
4 16 Eveillard M, Charru P, Rufat P et al. Methicillin-resistant *Staphylococcus aureus*  
5 carriage in a long-term care facility: hypothesis about selection and transmission.  
6  
7  
8 3 *Age Ageing* 2008;37:294-299.  
9  
10  
11 4 17 Stone ND, Lewis DR, Lowery HK et al. Importance of bacterial burden among  
12 methicillin-resistant *Staphylococcus aureus* carriers in a long-term care facility.  
13  
14 6 *Infect Control Hosp Epidemiol* 2008;29:143-148.  
15  
16  
17  
18 7 18 Hughes CM, Smith MB, Tunney MM. Infection control strategies for preventing the  
19 transmission of methicillin-resistant *Staphylococcus aureus* (MRSA) in nursing  
20 homes for older people. *Cochrane Database Syst Rev* CD006354 2008;(1).  
21  
22  
23  
24  
25 10 19 Care Standards Act. 2000. London, England, The Stationery Office Limited. 2006.  
26  
27  
28 11 20 Care Quality Commission. 2009. <http://www.cqc.org.uk/>.  
29  
30  
31 12 21 Hussey MA, Hughes JP. Design and analysis of stepped wedge cluster randomized  
32 trials. *Contemporary Clinical Trials* 2007;28:182-191.  
33  
34  
35  
36 14 22 Infection Control Nurses Association. Audit tool for monitoring infection control  
37 standards in community settings. 2005.  
38  
39 16 <http://www.ips.uk.net/template1.aspx?PageID=10&cid=19&category=Resources>.  
40  
41  
42  
43 17 23 NHS. Lewisham hand hygiene audit tool. 2006. [http://www.clean-safe-](http://www.clean-safe-care.nhs.uk/index.php?pid=5)  
44 [care.nhs.uk/index.php?pid=5](http://www.clean-safe-care.nhs.uk/index.php?pid=5).  
45  
46  
47  
48 19 24 Lassetter G, Charlett A, Lewis D et al. *Staphylococcus aureus* carriage in care  
49 homes: identification of risk factors, including the role of dementia. *Epidemiol Infect*  
50 20  
51 2010;138:686-696.  
52  
53  
54  
55  
56  
57  
58  
59  
60

- 1  
2  
3  
4 1 25 Mody L, Kauffman CA, Donabedian S et al. Epidemiology of *Staphylococcus*  
5  
6 2 *aureus* colonization in nursing home residents. *Clin Infect Dis* 2008;46:1368-1373.  
7  
8  
9 3 26 von Baum H, Schmidt C, Svoboda D et al. Risk factors for methicillin-resistant  
10  
11 4 *Staphylococcus aureus* carriage in residents of German nursing homes. *Infect*  
12  
13 5 *Control Hosp Epidemiol* 2002;23:511-515.  
14  
15  
16 6 27 Bradley SF, Terpenning MS, Ramsey MA et al. Methicillin-resistant *Staphylococcus*  
17  
18 7 *aureus*: colonization and infection in a long-term care facility. *Ann Intern Med*  
19  
20 8 1991;115:417-422.  
21  
22  
23 9 28 Datta R, Huang SS. Risk of infection and death due to methicillin-resistant  
24  
25 10 *Staphylococcus aureus* in long-term carriers. *Clin Infect Dis* 2008;47:176-181.  
26  
27  
28 11 29 Baldwin NS, Gilpin DF, Tunney MM et al. Cluster randomised controlled trial of an  
29  
30 12 infection control education and training intervention programme focusing on  
31  
32 13 methicillin-resistant *Staphylococcus aureus* in nursing homes for older people. *J*  
33  
34 14 *Hosp Infect* 2010;76:36-41.  
35  
36  
37 15 30 Huang TT, Wu SC. Evaluation of a training programme on knowledge and  
38  
39 16 compliance of nurse assistants' hand hygiene in nursing homes. *J Hosp Infect*  
40  
41 17 2008;68:164-170.  
42  
43  
44 18 31 Gopal RG, Jeanes A, Russell H et al. Effectiveness of short-term, enhanced,  
45  
46 19 infection control support in improving compliance with infection control guidelines  
47  
48 20 and practice in nursing homes: a cluster randomized trial. *Epidemiol Infect*  
49  
50 21 2009;137:1465-1471.  
51  
52  
53  
54  
55  
56  
57  
58  
59  
60

- 1  
2  
3  
4 1 32 Marshall C, Spelman D. Re: is throat screening necessary to detect methicillin-  
5  
6 2 resistant *Staphylococcus aureus* colonization in patients upon admission to an  
7  
8 3 intensive care unit? *J Clin Microbiol* 2007;45:3855.  
9  
10  
11 4 33 Lautenbach E, Nachamkin I, Hu B et al. Surveillance cultures for detection of  
12  
13 5 methicillin-resistant *Staphylococcus aureus*: diagnostic yield of anatomic sites and  
14  
15 6 comparison of provider- and patient-collected samples. *Infect Control Hosp*  
16  
17 7 *Epidemiol* 2009;30:380-382.  
18  
19  
20 8 34 Larssen K, Jacobsen T, Bergh K et al. Outbreak of methicillin-resistant  
21  
22 9 *Staphylococcus aureus* in two nursing homes in Central Norway. *J.Hosp.Infect*  
23  
24 10 2005;60: 312-316.  
25  
26  
27 11 35 Moret L, Tequi B, Lombrail P. Should self-assessment methods be used to  
28  
29 12 measure compliance with handwashing recommendations? A study carried out in a  
30  
31 13 French university hospital. *Am J Infect Control* 2004;32:384-390.  
32  
33  
34 14 36 Kohli E, Ptak J, Smith R et al.Variability in the Hawthorne effect with regard to hand  
35  
36 15 hygiene performance in high- and low-performing inpatient care units. *Infect Control*  
37  
38 16 *Hosp Epidemiol* 2009;30:222-225.  
39  
40  
41 17 37 Holden JD. Hawthorne effects and research into professional practice. *J Eval Clin*  
42  
43 18 *Pract* 2001;7:65-70.  
44  
45  
46 19 38 Backman C, Zoutman DE, Marck PB. An integrative review of the current evidence  
47  
48 20 on the relationship between hand hygiene interventions and the incidence of health  
49  
50 21 care-associated infections. *Am J Infect Control* 2008;36:333-348.  
51  
52  
53  
54  
55  
56  
57  
58  
59  
60

1  
2  
3  
4 1 39 Manzur A, Gavalda L, Ruiz de GE et al. Prevalence of methicillin-resistant  
5  
6 2 *Staphylococcus aureus* and factors associated with colonization among residents in  
7  
8 3 community long-term-care facilities in Spain. *Clin Microbiol Infect* 2008;14:867-872.  
9

10  
11 4 40 Coates T, Bax R, Coates A. Nasal decolonization of *Staphylococcus aureus* with  
12  
13 5 mupirocin: strengths, weaknesses and future prospects. *J Antimicrob Chemother*  
14  
15 6 2009;64:9-15.  
16

17  
18 7 41 Dancer SJ. Considering the introduction of universal MRSA screening. *J Hosp*  
19  
20 8 *Infect* 2008;69:315-320.  
21

22 9  
23  
24  
25 10  
26  
27 11 **Legend for Figure 1.**

28  
29  
30 12 **Changes in MRSA prevalence by Intervention Group per survey, before and after**  
31  
32 13 **the intervention.**  
33

34  
35 14  
36  
37  
38  
39  
40  
41  
42  
43  
44  
45  
46  
47  
48  
49  
50  
51  
52  
53  
54  
55  
56  
57  
58  
59  
60

1  
2  
3  
4  
5  
6  
7  
8  
9  
10  
11  
12  
13  
14  
15  
16  
17  
18  
19  
20  
21  
22  
23  
24  
25  
26  
27  
28  
29  
30  
31  
32  
33  
34  
35  
36  
37  
38  
39  
40  
41  
42  
43  
44  
45  
46  
47  
48  
49  
50  
51  
52  
53  
54  
55  
56  
57  
58  
59  
60

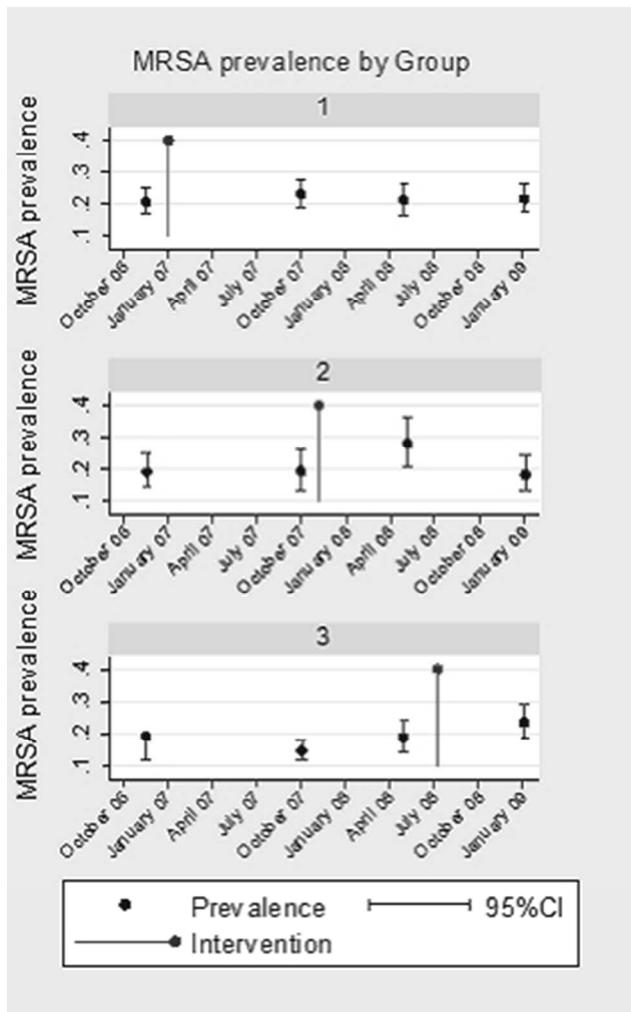

Changes in MRSA prevalence by Intervention Group per survey, before and after the intervention. 83x135mm (96 x 96 DPI)

Dear Dina Arbridge

1  
2  
3  
4  
5  
6  
7  
8  
9  
10  
11  
12  
13  
14  
15  
16  
17  
18  
19  
20  
21  
22  
23  
24  
25  
26  
27  
28  
29  
30  
31  
32  
33  
34  
35  
36  
37  
38  
39  
40  
41  
42  
43  
44  
45  
46  
47  
48  
49  
50  
51  
52  
53  
54  
55  
56  
57  
58  
59  
60

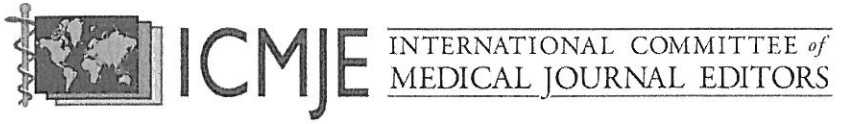

**ICMJE Form for Disclosure of Potential Conflicts of Interest**

The longitudinal prevalence of MRSA in care home residents and the effectiveness of improving infection prevention knowledge and practice on colonisation.  
C. Horner et al.

| Relevant financial activities outside the submitted work |    |                   |                            |        |          |  |
|----------------------------------------------------------|----|-------------------|----------------------------|--------|----------|--|
| Type of Relationship (in alphabetical order)             | No | Money Paid to You | Money to Your Institution* | Entity | Comments |  |

None →

D.M. Han  
22/8/11



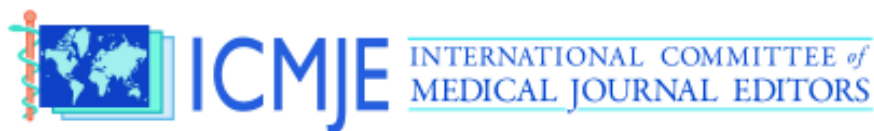

## ICMJE Form for Disclosure of Potential Conflicts of Interest

### Instructions

**The purpose of this form is to provide readers of your manuscript with information about your other interests that could influence how they receive and understand your work. The form is designed to be completed electronically and stored electronically. It contains programming that allows appropriate data display. Each author should submit a separate form and is responsible for the accuracy and completeness of the submitted information. The form is in four parts.**

#### 1. Identifying information.

Enter your full name. If you are NOT the corresponding author please check the box "no" and a space to enter the name of the corresponding author in the space that appears. Provide the requested manuscript information. Double-check the manuscript number and enter it.

#### 2. The work under consideration for publication.

This section asks for information about the work that you have submitted for publication. The time frame for this reporting is that of the work itself, from the initial conception and planning to the present. The requested information is about resources that you received, either directly or indirectly (via your institution), to enable you to complete the work. Checking "No" means that you did the work without receiving any financial support from any third party -- that is, the work was supported by funds from the same institution that pays your salary and that institution did not receive third-party funds with which to pay you. If you or your institution received funds from a third party to support the work, such as a government granting agency, charitable foundation or commercial sponsor, check "Yes". Then complete the appropriate boxes to indicate the type of support and whether the payment went to you, or to your institution, or both.

#### 3. Relevant financial activities outside the submitted work.

This section asks about your financial relationships with entities in the bio-medical arena that could be perceived to influence, or that give the appearance of potentially influencing, what you wrote in the submitted work. You should disclose interactions with ANY entity that could be considered broadly relevant to the work. For example, if your article is about testing an epidermal growth factor receptor (EGFR) antagonist in lung cancer, you should report all associations with entities pursuing diagnostic or therapeutic strategies in cancer in general, not just in the area of EGFR or lung cancer.

Report all sources of revenue paid (or promised to be paid) directly to you or your institution on your behalf over the 36 months prior to submission of the work. This should include all monies from sources with relevance to the submitted work, not just monies from the entity that sponsored the research. Please note that your interactions with the work's sponsor that are outside the submitted work should also be listed here. If there is any question, it is usually better to disclose a relationship than not to do so.

For grants you have received for work outside the submitted work, you should disclose support ONLY from entities that could be perceived to be affected financially by the published work, such as drug companies, or foundations supported by entities that could be perceived to have a financial stake in the outcome. Public funding sources, such as government agencies, charitable foundations or academic institutions, need not be disclosed. For example, if a government agency sponsored a study in which you have been involved and drugs were provided by a pharmaceutical company, you need only list the pharmaceutical company.

#### 4. Other relationships.

Use this section to report other relationships or activities that readers could perceive to have influenced, or that give the appearance of potentially influencing, what you wrote in the submitted work.



## ICMJE Form for Disclosure of Potential Conflicts of Interest

### Section 1. Identifying Information

|                                                                                                                                                                                  |                                                                     |                                                      |
|----------------------------------------------------------------------------------------------------------------------------------------------------------------------------------|---------------------------------------------------------------------|------------------------------------------------------|
| 1. Given Name (First Name)<br>CAROLYNE                                                                                                                                           | 2. Surname (Last Name)<br>HORNER                                    | 3. Effective Date (07-August-2008)<br>31-August-2011 |
| 4. Are you the corresponding author?                                                                                                                                             | <input type="checkbox"/> Yes <input checked="" type="checkbox"/> No | Corresponding Author's Name<br>PROFESSOR MARK WILCOX |
| 5. Manuscript Title<br>The longitudinal prevalence of MRSA in care home residents and the effectiveness of improving infection prevention knowledge and practice on colonisation |                                                                     |                                                      |
| 6. Manuscript Identifying Number (if you know it)<br>BMJ.2011.000490                                                                                                             |                                                                     |                                                      |

### Section 2. The Work Under Consideration for Publication

Did you or your institution at any time receive payment or services from a third party for any aspect of the submitted work (including but not limited to grants, data monitoring board, study design, manuscript preparation, statistical analysis, etc...)?

Complete each row by checking "No" or providing the requested information. **If you have more than one relationship click the "Add" button to add a row. Excess rows can be removed by clicking the "X" button.**

#### The Work Under Consideration for Publication

| Type                                                                                                                                    | No                                  | Money Paid to You        | Money to Your Institution*          | Name of Entity       | Comments** |     |
|-----------------------------------------------------------------------------------------------------------------------------------------|-------------------------------------|--------------------------|-------------------------------------|----------------------|------------|-----|
| 1. Grant                                                                                                                                | <input type="checkbox"/>            | <input type="checkbox"/> | <input checked="" type="checkbox"/> | Department of Health |            | X   |
|                                                                                                                                         |                                     |                          |                                     |                      |            | ADD |
| 2. Consulting fee or honorarium                                                                                                         | <input checked="" type="checkbox"/> | <input type="checkbox"/> | <input type="checkbox"/>            |                      |            | X   |
|                                                                                                                                         |                                     |                          |                                     |                      |            | ADD |
| 3. Support for travel to meetings for the study or other purposes                                                                       | <input checked="" type="checkbox"/> | <input type="checkbox"/> | <input type="checkbox"/>            |                      |            | X   |
|                                                                                                                                         |                                     |                          |                                     |                      |            | ADD |
| 4. Fees for participation in review activities such as data monitoring boards, statistical analysis, end point committees, and the like | <input checked="" type="checkbox"/> | <input type="checkbox"/> | <input type="checkbox"/>            |                      |            | X   |
|                                                                                                                                         |                                     |                          |                                     |                      |            | ADD |
| 5. Payment for writing or reviewing the manuscript                                                                                      | <input checked="" type="checkbox"/> | <input type="checkbox"/> | <input type="checkbox"/>            |                      |            | X   |
|                                                                                                                                         |                                     |                          |                                     |                      |            | ADD |
| 6. Provision of writing assistance, medicines, equipment, or administrative support                                                     | <input checked="" type="checkbox"/> | <input type="checkbox"/> | <input type="checkbox"/>            |                      |            | X   |

HORNER

2



## ICMJE Form for Disclosure of Potential Conflicts of Interest

| The Work Under Consideration for Publication |                                     |                          |                            |                |            |     |
|----------------------------------------------|-------------------------------------|--------------------------|----------------------------|----------------|------------|-----|
| Type                                         | No                                  | Money Paid to You        | Money to Your Institution* | Name of Entity | Comments** |     |
| 7. Other                                     | <input checked="" type="checkbox"/> | <input type="checkbox"/> | <input type="checkbox"/>   |                |            | ADD |
|                                              |                                     |                          |                            |                |            | X   |
|                                              |                                     |                          |                            |                |            | ADD |

\* This means money that your institution received for your efforts on this study.

\*\* Use this section to provide any needed explanation.

### Section 3.

#### Relevant financial activities outside the submitted work.

Place a check in the appropriate boxes in the table to indicate whether you have financial relationships (regardless of amount of compensation) with entities as described in the instructions. Use one line for each entity; add as many lines as you need by clicking the "Add +" box. You should report relationships that were present during the 36 months prior to submission.

Complete each row by checking "No" or providing the requested information. **If you have more than one relationship click the "Add" button to add a row. Excess rows can be removed by clicking the "X" button.**

| Relevant financial activities outside the submitted work      |                                     |                          |                            |        |          |     |
|---------------------------------------------------------------|-------------------------------------|--------------------------|----------------------------|--------|----------|-----|
| Type of Relationship (in alphabetical order)                  | No                                  | Money Paid to You        | Money to Your Institution* | Entity | Comments |     |
| 1. Board membership                                           | <input checked="" type="checkbox"/> | <input type="checkbox"/> | <input type="checkbox"/>   |        |          | X   |
|                                                               |                                     |                          |                            |        |          | ADD |
| 2. Consultancy                                                | <input checked="" type="checkbox"/> | <input type="checkbox"/> | <input type="checkbox"/>   |        |          | X   |
|                                                               |                                     |                          |                            |        |          | ADD |
| 3. Employment                                                 | <input checked="" type="checkbox"/> | <input type="checkbox"/> | <input type="checkbox"/>   |        |          | X   |
|                                                               |                                     |                          |                            |        |          | ADD |
| 4. Expert testimony                                           | <input checked="" type="checkbox"/> | <input type="checkbox"/> | <input type="checkbox"/>   |        |          | X   |
|                                                               |                                     |                          |                            |        |          | ADD |
| 5. Grants/grants pending                                      | <input checked="" type="checkbox"/> | <input type="checkbox"/> | <input type="checkbox"/>   |        |          | X   |
|                                                               |                                     |                          |                            |        |          | ADD |
| 6. Payment for lectures including service on speakers bureaus | <input checked="" type="checkbox"/> | <input type="checkbox"/> | <input type="checkbox"/>   |        |          | X   |
|                                                               |                                     |                          |                            |        |          | ADD |
| 7. Payment for manuscript preparation                         | <input checked="" type="checkbox"/> | <input type="checkbox"/> | <input type="checkbox"/>   |        |          | X   |



## ICMJE Form for Disclosure of Potential Conflicts of Interest

| Relevant financial activities outside the submitted work                    |                                     |                          |                            |        |          |     |
|-----------------------------------------------------------------------------|-------------------------------------|--------------------------|----------------------------|--------|----------|-----|
| Type of Relationship (in alphabetical order)                                | No                                  | Money Paid to You        | Money to Your Institution* | Entity | Comments |     |
|                                                                             |                                     |                          |                            |        |          | ADD |
| 8. Patents (planned, pending or issued)                                     | <input checked="" type="checkbox"/> | <input type="checkbox"/> | <input type="checkbox"/>   |        |          | X   |
|                                                                             |                                     |                          |                            |        |          | ADD |
| 9. Royalties                                                                | <input checked="" type="checkbox"/> | <input type="checkbox"/> | <input type="checkbox"/>   |        |          | X   |
|                                                                             |                                     |                          |                            |        |          | ADD |
| 10. Payment for development of educational presentations                    | <input checked="" type="checkbox"/> | <input type="checkbox"/> | <input type="checkbox"/>   |        |          | X   |
|                                                                             |                                     |                          |                            |        |          | ADD |
| 11. Stock/stock options                                                     | <input checked="" type="checkbox"/> | <input type="checkbox"/> | <input type="checkbox"/>   |        |          | X   |
|                                                                             |                                     |                          |                            |        |          | ADD |
| 12. Travel/accommodations/meeting expenses unrelated to activities listed** | <input checked="" type="checkbox"/> | <input type="checkbox"/> | <input type="checkbox"/>   |        |          | X   |
|                                                                             |                                     |                          |                            |        |          | ADD |
| 13. Other (err on the side of full disclosure)                              | <input checked="" type="checkbox"/> | <input type="checkbox"/> | <input type="checkbox"/>   |        |          | X   |
|                                                                             |                                     |                          |                            |        |          | ADD |

\* This means money that your institution received for your efforts.

\*\* For example, if you report a consultancy above there is no need to report travel related to that consultancy on this line.

### Section 4. Other relationships

Are there other relationships or activities that readers could perceive to have influenced, or that give the appearance of potentially influencing, what you wrote in the submitted work?

- No other relationships/conditions/circumstances that present a potential conflict of interest
- Yes, the following relationships/conditions/circumstances are present (explain below):

At the time of manuscript acceptance, journals will ask authors to confirm and, if necessary, update their disclosure statements. On occasion, journals may ask authors to disclose further information about reported relationships.

Hide All Table Rows Checked 'No'

SAVE

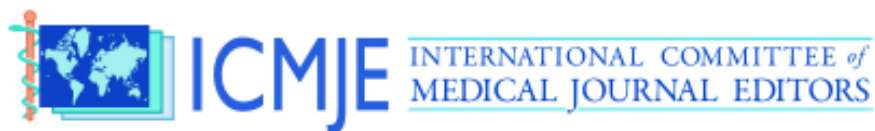

## ICMJE Form for Disclosure of Potential Conflicts of Interest

---

### Evaluation and Feedback

Please visit <http://www.icmje.org/cgi-bin/feedback> to provide feedback on your experience with completing this form.

For peer review only



## ICMJE Form for Disclosure of Potential Conflicts of Interest

### Instructions

**The purpose of this form is to provide readers of your manuscript with information about your other interests that could influence how they receive and understand your work. The form is designed to be completed electronically and stored electronically. It contains programming that allows appropriate data display. Each author should submit a separate form and is responsible for the accuracy and completeness of the submitted information. The form is in four parts.**

#### 1. Identifying information.

Enter your full name. If you are NOT the corresponding author please check the box "no" and a space to enter the name of the corresponding author in the space that appears. Provide the requested manuscript information. Double-check the manuscript number and enter it.

#### 2. The work under consideration for publication.

This section asks for information about the work that you have submitted for publication. The time frame for this reporting is that of the work itself, from the initial conception and planning to the present. The requested information is about resources that you received, either directly or indirectly (via your institution), to enable you to complete the work. Checking "No" means that you did the work without receiving any financial support from any third party -- that is, the work was supported by funds from the same institution that pays your salary and that institution did not receive third-party funds with which to pay you. If you or your institution received funds from a third party to support the work, such as a government granting agency, charitable foundation or commercial sponsor, check "Yes". Then complete the appropriate boxes to indicate the type of support and whether the payment went to you, or to your institution, or both.

#### 3. Relevant financial activities outside the submitted work.

This section asks about your financial relationships with entities in the bio-medical arena that could be perceived to influence, or that give the appearance of potentially influencing, what you wrote in the submitted work. You should disclose interactions with ANY entity that could be considered broadly relevant to the work. For example, if your article is about testing an epidermal growth factor receptor (EGFR) antagonist in lung cancer, you should report all associations with entities pursuing diagnostic or therapeutic strategies in cancer in general, not just in the area of EGFR or lung cancer.

Report all sources of revenue paid (or promised to be paid) directly to you or your institution on your behalf over the 36 months prior to submission of the work. This should include all monies from sources with relevance to the submitted work, not just monies from the entity that sponsored the research. Please note that your interactions with the work's sponsor that are outside the submitted work should also be listed here. If there is any question, it is usually better to disclose a relationship than not to do so.

For grants you have received for work outside the submitted work, you should disclose support ONLY from entities that could be perceived to be affected financially by the published work, such as drug companies, or foundations supported by entities that could be perceived to have a financial stake in the outcome. Public funding sources, such as government agencies, charitable foundations or academic institutions, need not be disclosed. For example, if a government agency sponsored a study in which you have been involved and drugs were provided by a pharmaceutical company, you need only list the pharmaceutical company.

#### 4. Other relationships.

Use this section to report other relationships or activities that readers could perceive to have influenced, or that give the appearance of potentially influencing, what you wrote in the submitted work.

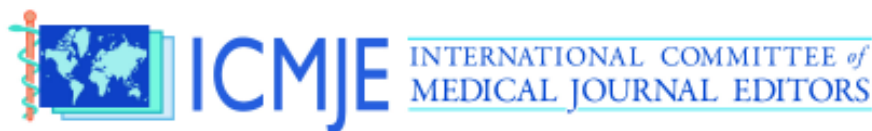

## ICMJE Form for Disclosure of Potential Conflicts of Interest

### Section 1. Identifying Information

1. Given Name (First Name) 2. Surname (Last Name) 3. Effective Date (07-August-2008)  
 David Tompkins 31-August-2011

4. Are you the corresponding author?  Yes  No Corresponding Author's Name  
PROFESSOR MARK WILCOX

5. Manuscript Title  
 The longitudinal prevalence of MRSA in care home residents and the effectiveness of improving infection prevention knowledge and practice on colonisation

6. Manuscript Identifying Number (if you know it)  
 BMJ.2011.000490

### Section 2. The Work Under Consideration for Publication

Did you or your institution at any time receive payment or services from a third party for any aspect of the submitted work (including but not limited to grants, data monitoring board, study design, manuscript preparation, statistical analysis, etc...)?

Complete each row by checking "No" or providing the requested information. **If you have more than one relationship click the "Add" button to add a row. Excess rows can be removed by clicking the "X" button.**

#### The Work Under Consideration for Publication

| Type                                                                                                                                    | No                                  | Money Paid to You        | Money to Your Institution*          | Name of Entity       | Comments** |     |
|-----------------------------------------------------------------------------------------------------------------------------------------|-------------------------------------|--------------------------|-------------------------------------|----------------------|------------|-----|
| 1. Grant                                                                                                                                | <input type="checkbox"/>            | <input type="checkbox"/> | <input checked="" type="checkbox"/> | Department of Health |            | X   |
|                                                                                                                                         |                                     |                          |                                     |                      |            | ADD |
| 2. Consulting fee or honorarium                                                                                                         | <input checked="" type="checkbox"/> | <input type="checkbox"/> | <input type="checkbox"/>            |                      |            | X   |
|                                                                                                                                         |                                     |                          |                                     |                      |            | ADD |
| 3. Support for travel to meetings for the study or other purposes                                                                       | <input checked="" type="checkbox"/> | <input type="checkbox"/> | <input type="checkbox"/>            |                      |            | X   |
|                                                                                                                                         |                                     |                          |                                     |                      |            | ADD |
| 4. Fees for participation in review activities such as data monitoring boards, statistical analysis, end point committees, and the like | <input checked="" type="checkbox"/> | <input type="checkbox"/> | <input type="checkbox"/>            |                      |            | X   |
|                                                                                                                                         |                                     |                          |                                     |                      |            | ADD |
| 5. Payment for writing or reviewing the manuscript                                                                                      | <input checked="" type="checkbox"/> | <input type="checkbox"/> | <input type="checkbox"/>            |                      |            | X   |
|                                                                                                                                         |                                     |                          |                                     |                      |            | ADD |
| 6. Provision of writing assistance, medicines, equipment, or administrative support                                                     | <input checked="" type="checkbox"/> | <input type="checkbox"/> | <input type="checkbox"/>            |                      |            | X   |

Tompkins

2



## ICMJE Form for Disclosure of Potential Conflicts of Interest

### The Work Under Consideration for Publication

| Type     | No                                  | Money Paid to You        | Money to Your Institution* | Name of Entity | Comments** |     |
|----------|-------------------------------------|--------------------------|----------------------------|----------------|------------|-----|
|          |                                     |                          |                            |                |            | ADD |
| 7. Other | <input checked="" type="checkbox"/> | <input type="checkbox"/> | <input type="checkbox"/>   |                |            | X   |
|          |                                     |                          |                            |                |            | ADD |

\* This means money that your institution received for your efforts on this study.

\*\* Use this section to provide any needed explanation.

### Section 3.

#### Relevant financial activities outside the submitted work.

Place a check in the appropriate boxes in the table to indicate whether you have financial relationships (regardless of amount of compensation) with entities as described in the instructions. Use one line for each entity; add as many lines as you need by clicking the "Add +" box. You should report relationships that were present during the 36 months prior to submission.

Complete each row by checking "No" or providing the requested information. **If you have more than one relationship click the "Add" button to add a row. Excess rows can be removed by clicking the "X" button.**

### Relevant financial activities outside the submitted work

| Type of Relationship (in alphabetical order)                  | No                                  | Money Paid to You        | Money to Your Institution* | Entity | Comments |     |
|---------------------------------------------------------------|-------------------------------------|--------------------------|----------------------------|--------|----------|-----|
| 1. Board membership                                           | <input checked="" type="checkbox"/> | <input type="checkbox"/> | <input type="checkbox"/>   |        |          | X   |
|                                                               |                                     |                          |                            |        |          | ADD |
| 2. Consultancy                                                | <input checked="" type="checkbox"/> | <input type="checkbox"/> | <input type="checkbox"/>   |        |          | X   |
|                                                               |                                     |                          |                            |        |          | ADD |
| 3. Employment                                                 | <input checked="" type="checkbox"/> | <input type="checkbox"/> | <input type="checkbox"/>   |        |          | X   |
|                                                               |                                     |                          |                            |        |          | ADD |
| 4. Expert testimony                                           | <input checked="" type="checkbox"/> | <input type="checkbox"/> | <input type="checkbox"/>   |        |          | X   |
|                                                               |                                     |                          |                            |        |          | ADD |
| 5. Grants/grants pending                                      | <input checked="" type="checkbox"/> | <input type="checkbox"/> | <input type="checkbox"/>   |        |          | X   |
|                                                               |                                     |                          |                            |        |          | ADD |
| 6. Payment for lectures including service on speakers bureaus | <input checked="" type="checkbox"/> | <input type="checkbox"/> | <input type="checkbox"/>   |        |          | X   |
|                                                               |                                     |                          |                            |        |          | ADD |
| 7. Payment for manuscript preparation                         | <input checked="" type="checkbox"/> | <input type="checkbox"/> | <input type="checkbox"/>   |        |          | X   |





## ICMJE Form for Disclosure of Potential Conflicts of Interest

| Relevant financial activities outside the submitted work                    |                                     |                          |                            |        |          |     |
|-----------------------------------------------------------------------------|-------------------------------------|--------------------------|----------------------------|--------|----------|-----|
| Type of Relationship (in alphabetical order)                                | No                                  | Money Paid to You        | Money to Your Institution* | Entity | Comments |     |
|                                                                             |                                     |                          |                            |        |          | ADD |
| 8. Patents (planned, pending or issued)                                     | <input checked="" type="checkbox"/> | <input type="checkbox"/> | <input type="checkbox"/>   |        |          | X   |
|                                                                             |                                     |                          |                            |        |          | ADD |
| 9. Royalties                                                                | <input checked="" type="checkbox"/> | <input type="checkbox"/> | <input type="checkbox"/>   |        |          | X   |
|                                                                             |                                     |                          |                            |        |          | ADD |
| 10. Payment for development of educational presentations                    | <input checked="" type="checkbox"/> | <input type="checkbox"/> | <input type="checkbox"/>   |        |          | X   |
|                                                                             |                                     |                          |                            |        |          | ADD |
| 11. Stock/stock options                                                     | <input checked="" type="checkbox"/> | <input type="checkbox"/> | <input type="checkbox"/>   |        |          | X   |
|                                                                             |                                     |                          |                            |        |          | ADD |
| 12. Travel/accommodations/meeting expenses unrelated to activities listed** | <input checked="" type="checkbox"/> | <input type="checkbox"/> | <input type="checkbox"/>   |        |          | X   |
|                                                                             |                                     |                          |                            |        |          | ADD |
| 13. Other (err on the side of full disclosure)                              | <input checked="" type="checkbox"/> | <input type="checkbox"/> | <input type="checkbox"/>   |        |          | X   |
|                                                                             |                                     |                          |                            |        |          | ADD |

\* This means money that your institution received for your efforts.

\*\* For example, if you report a consultancy above there is no need to report travel related to that consultancy on this line.

### Section 4. Other relationships

Are there other relationships or activities that readers could perceive to have influenced, or that give the appearance of potentially influencing, what you wrote in the submitted work?

- No other relationships/conditions/circumstances that present a potential conflict of interest
- Yes, the following relationships/conditions/circumstances are present (explain below):

At the time of manuscript acceptance, journals will ask authors to confirm and, if necessary, update their disclosure statements. On occasion, journals may ask authors to disclose further information about reported relationships.

Hide All Table Rows Checked 'No'

SAVE

1  
2  
3  
4  
5  
6  
7  
8  
9  
10  
11  
12  
13  
14  
15  
16  
17  
18  
19  
20  
21  
22  
23  
24  
25  
26  
27  
28  
29  
30  
31  
32  
33  
34  
35  
36  
37  
38  
39  
40  
41  
42  
43  
44  
45  
46  
47  
48  
49  
50  
51  
52  
53  
54  
55  
56  
57  
58  
59  
60

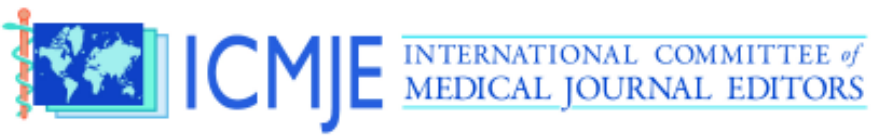

## ICMJE Form for Disclosure of Potential Conflicts of Interest

---

### Evaluation and Feedback

Please visit <http://www.icmje.org/cgi-bin/feedback> to provide feedback on your experience with completing this form.

For peer review only



## ICMJE Form for Disclosure of Potential Conflicts of Interest

### Instructions

**The purpose of this form is to provide readers of your manuscript with information about your other interests that could influence how they receive and understand your work. The form is designed to be completed electronically and stored electronically. It contains programming that allows appropriate data display. Each author should submit a separate form and is responsible for the accuracy and completeness of the submitted information. The form is in four parts.**

#### 1. Identifying information.

Enter your full name. If you are NOT the corresponding author please check the box "no" and a space to enter the name of the corresponding author in the space that appears. Provide the requested manuscript information. Double-check the manuscript number and enter it.

#### 2. The work under consideration for publication.

This section asks for information about the work that you have submitted for publication. The time frame for this reporting is that of the work itself, from the initial conception and planning to the present. The requested information is about resources that you received, either directly or indirectly (via your institution), to enable you to complete the work. Checking "No" means that you did the work without receiving any financial support from any third party -- that is, the work was supported by funds from the same institution that pays your salary and that institution did not receive third-party funds with which to pay you. If you or your institution received funds from a third party to support the work, such as a government granting agency, charitable foundation or commercial sponsor, check "Yes". Then complete the appropriate boxes to indicate the type of support and whether the payment went to you, or to your institution, or both.

#### 3. Relevant financial activities outside the submitted work.

This section asks about your financial relationships with entities in the bio-medical arena that could be perceived to influence, or that give the appearance of potentially influencing, what you wrote in the submitted work. You should disclose interactions with ANY entity that could be considered broadly relevant to the work. For example, if your article is about testing an epidermal growth factor receptor (EGFR) antagonist in lung cancer, you should report all associations with entities pursuing diagnostic or therapeutic strategies in cancer in general, not just in the area of EGFR or lung cancer.

Report all sources of revenue paid (or promised to be paid) directly to you or your institution on your behalf over the 36 months prior to submission of the work. This should include all monies from sources with relevance to the submitted work, not just monies from the entity that sponsored the research. Please note that your interactions with the work's sponsor that are outside the submitted work should also be listed here. If there is any question, it is usually better to disclose a relationship than not to do so.

For grants you have received for work outside the submitted work, you should disclose support ONLY from entities that could be perceived to be affected financially by the published work, such as drug companies, or foundations supported by entities that could be perceived to have a financial stake in the outcome. Public funding sources, such as government agencies, charitable foundations or academic institutions, need not be disclosed. For example, if a government agency sponsored a study in which you have been involved and drugs were provided by a pharmaceutical company, you need only list the pharmaceutical company.

#### 4. Other relationships.

Use this section to report other relationships or activities that readers could perceive to have influenced, or that give the appearance of potentially influencing, what you wrote in the submitted work.

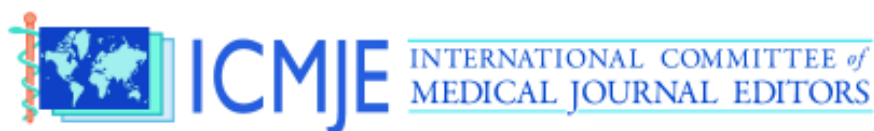

## ICMJE Form for Disclosure of Potential Conflicts of Interest

### Section 1. Identifying Information

|                                                                                                                                                                                  |                                                                     |                                                      |
|----------------------------------------------------------------------------------------------------------------------------------------------------------------------------------|---------------------------------------------------------------------|------------------------------------------------------|
| 1. Given Name (First Name)<br>Gillian                                                                                                                                            | 2. Surname (Last Name)<br>Hodgson                                   | 3. Effective Date (07-August-2008)<br>31-August-2011 |
| 4. Are you the corresponding author?                                                                                                                                             | <input type="checkbox"/> Yes <input checked="" type="checkbox"/> No | Corresponding Author's Name<br>PROFESSOR MARK WILCOX |
| 5. Manuscript Title<br>The longitudinal prevalence of MRSA in care home residents and the effectiveness of improving infection prevention knowledge and practice on colonisation |                                                                     |                                                      |
| 6. Manuscript Identifying Number (if you know it)<br>BMJ.2011.000490                                                                                                             |                                                                     |                                                      |

### Section 2. The Work Under Consideration for Publication

Did you or your institution at any time receive payment or services from a third party for any aspect of the submitted work (including but not limited to grants, data monitoring board, study design, manuscript preparation, statistical analysis, etc...)?

Complete each row by checking "No" or providing the requested information. **If you have more than one relationship click the "Add" button to add a row. Excess rows can be removed by clicking the "X" button.**

#### The Work Under Consideration for Publication

| Type                                                                                                                                    | No                                  | Money Paid to You        | Money to Your Institution*          | Name of Entity       | Comments** |          |
|-----------------------------------------------------------------------------------------------------------------------------------------|-------------------------------------|--------------------------|-------------------------------------|----------------------|------------|----------|
| 1. Grant                                                                                                                                | <input type="checkbox"/>            | <input type="checkbox"/> | <input checked="" type="checkbox"/> | Department of Health |            | X<br>ADD |
| 2. Consulting fee or honorarium                                                                                                         | <input checked="" type="checkbox"/> | <input type="checkbox"/> | <input type="checkbox"/>            |                      |            | X<br>ADD |
| 3. Support for travel to meetings for the study or other purposes                                                                       | <input checked="" type="checkbox"/> | <input type="checkbox"/> | <input type="checkbox"/>            |                      |            | X<br>ADD |
| 4. Fees for participation in review activities such as data monitoring boards, statistical analysis, end point committees, and the like | <input checked="" type="checkbox"/> | <input type="checkbox"/> | <input type="checkbox"/>            |                      |            | X<br>ADD |
| 5. Payment for writing or reviewing the manuscript                                                                                      | <input checked="" type="checkbox"/> | <input type="checkbox"/> | <input type="checkbox"/>            |                      |            | X<br>ADD |
| 6. Provision of writing assistance, medicines, equipment, or administrative support                                                     | <input checked="" type="checkbox"/> | <input type="checkbox"/> | <input type="checkbox"/>            |                      |            | X        |

Hodgson

2



## ICMJE Form for Disclosure of Potential Conflicts of Interest

| The Work Under Consideration for Publication |                                     |                          |                            |                |            |     |
|----------------------------------------------|-------------------------------------|--------------------------|----------------------------|----------------|------------|-----|
| Type                                         | No                                  | Money Paid to You        | Money to Your Institution* | Name of Entity | Comments** |     |
|                                              |                                     |                          |                            |                |            | ADD |
| 7. Other                                     | <input checked="" type="checkbox"/> | <input type="checkbox"/> | <input type="checkbox"/>   |                |            | X   |
|                                              |                                     |                          |                            |                |            | ADD |

\* This means money that your institution received for your efforts on this study.

\*\* Use this section to provide any needed explanation.

### Section 3.

#### Relevant financial activities outside the submitted work.

Place a check in the appropriate boxes in the table to indicate whether you have financial relationships (regardless of amount of compensation) with entities as described in the instructions. Use one line for each entity; add as many lines as you need by clicking the "Add +" box. You should report relationships that were present during the 36 months prior to submission.

Complete each row by checking "No" or providing the requested information. **If you have more than one relationship click the "Add" button to add a row. Excess rows can be removed by clicking the "X" button.**

| Relevant financial activities outside the submitted work      |                                     |                          |                            |        |          |     |
|---------------------------------------------------------------|-------------------------------------|--------------------------|----------------------------|--------|----------|-----|
| Type of Relationship (in alphabetical order)                  | No                                  | Money Paid to You        | Money to Your Institution* | Entity | Comments |     |
| 1. Board membership                                           | <input checked="" type="checkbox"/> | <input type="checkbox"/> | <input type="checkbox"/>   |        |          | X   |
|                                                               |                                     |                          |                            |        |          | ADD |
| 2. Consultancy                                                | <input checked="" type="checkbox"/> | <input type="checkbox"/> | <input type="checkbox"/>   |        |          | X   |
|                                                               |                                     |                          |                            |        |          | ADD |
| 3. Employment                                                 | <input checked="" type="checkbox"/> | <input type="checkbox"/> | <input type="checkbox"/>   |        |          | X   |
|                                                               |                                     |                          |                            |        |          | ADD |
| 4. Expert testimony                                           | <input checked="" type="checkbox"/> | <input type="checkbox"/> | <input type="checkbox"/>   |        |          | X   |
|                                                               |                                     |                          |                            |        |          | ADD |
| 5. Grants/grants pending                                      | <input checked="" type="checkbox"/> | <input type="checkbox"/> | <input type="checkbox"/>   |        |          | X   |
|                                                               |                                     |                          |                            |        |          | ADD |
| 6. Payment for lectures including service on speakers bureaus | <input checked="" type="checkbox"/> | <input type="checkbox"/> | <input type="checkbox"/>   |        |          | X   |
|                                                               |                                     |                          |                            |        |          | ADD |
| 7. Payment for manuscript preparation                         | <input checked="" type="checkbox"/> | <input type="checkbox"/> | <input type="checkbox"/>   |        |          | X   |



## ICMJE Form for Disclosure of Potential Conflicts of Interest

| Relevant financial activities outside the submitted work                    |                                     |                          |                            |        |          |     |
|-----------------------------------------------------------------------------|-------------------------------------|--------------------------|----------------------------|--------|----------|-----|
| Type of Relationship (in alphabetical order)                                | No                                  | Money Paid to You        | Money to Your Institution* | Entity | Comments |     |
|                                                                             |                                     |                          |                            |        |          | ADD |
| 8. Patents (planned, pending or issued)                                     | <input checked="" type="checkbox"/> | <input type="checkbox"/> | <input type="checkbox"/>   |        |          | X   |
|                                                                             |                                     |                          |                            |        |          | ADD |
| 9. Royalties                                                                | <input checked="" type="checkbox"/> | <input type="checkbox"/> | <input type="checkbox"/>   |        |          | X   |
|                                                                             |                                     |                          |                            |        |          | ADD |
| 10. Payment for development of educational presentations                    | <input checked="" type="checkbox"/> | <input type="checkbox"/> | <input type="checkbox"/>   |        |          | X   |
|                                                                             |                                     |                          |                            |        |          | ADD |
| 11. Stock/stock options                                                     | <input checked="" type="checkbox"/> | <input type="checkbox"/> | <input type="checkbox"/>   |        |          | X   |
|                                                                             |                                     |                          |                            |        |          | ADD |
| 12. Travel/accommodations/meeting expenses unrelated to activities listed** | <input checked="" type="checkbox"/> | <input type="checkbox"/> | <input type="checkbox"/>   |        |          | X   |
|                                                                             |                                     |                          |                            |        |          | ADD |
| 13. Other (err on the side of full disclosure)                              | <input checked="" type="checkbox"/> | <input type="checkbox"/> | <input type="checkbox"/>   |        |          | X   |
|                                                                             |                                     |                          |                            |        |          | ADD |

\* This means money that your institution received for your efforts.

\*\* For example, if you report a consultancy above there is no need to report travel related to that consultancy on this line.

### Section 4. Other relationships

Are there other relationships or activities that readers could perceive to have influenced, or that give the appearance of potentially influencing, what you wrote in the submitted work?

- No other relationships/conditions/circumstances that present a potential conflict of interest
- Yes, the following relationships/conditions/circumstances are present (explain below):

At the time of manuscript acceptance, journals will ask authors to confirm and, if necessary, update their disclosure statements. On occasion, journals may ask authors to disclose further information about reported relationships.

Hide All Table Rows Checked 'No'

SAVE



## ICMJE Form for Disclosure of Potential Conflicts of Interest

---

### Evaluation and Feedback

Please visit <http://www.icmje.org/cgi-bin/feedback> to provide feedback on your experience with completing this form.

For peer review only

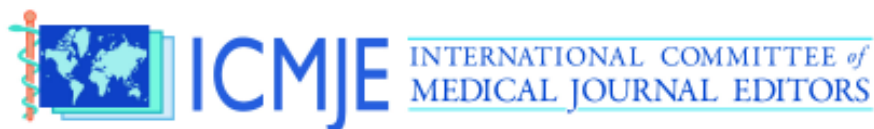

## ICMJE Form for Disclosure of Potential Conflicts of Interest

### Instructions

The purpose of this form is to provide readers of your manuscript with information about your other interests that could influence how they receive and understand your work. The form is designed to be completed electronically and stored electronically. It contains programming that allows appropriate data display. Each author should submit a separate form and is responsible for the accuracy and completeness of the submitted information. The form is in four parts.

#### 1. Identifying information.

Enter your full name. If you are NOT the corresponding author please check the box "no" and a space to enter the name of the corresponding author in the space that appears. Provide the requested manuscript information. Double-check the manuscript number and enter it.

#### 2. The work under consideration for publication.

This section asks for information about the work that you have submitted for publication. The time frame for this reporting is that of the work itself, from the initial conception and planning to the present. The requested information is about resources that you received, either directly or indirectly (via your institution), to enable you to complete the work. Checking "No" means that you did the work without receiving any financial support from any third party -- that is, the work was supported by funds from the same institution that pays your salary and that institution did not receive third-party funds with which to pay you. If you or your institution received funds from a third party to support the work, such as a government granting agency, charitable foundation or commercial sponsor, check "Yes". Then complete the appropriate boxes to indicate the type of support and whether the payment went to you, or to your institution, or both.

#### 3. Relevant financial activities outside the submitted work.

This section asks about your financial relationships with entities in the bio-medical arena that could be perceived to influence, or that give the appearance of potentially influencing, what you wrote in the submitted work. You should disclose interactions with ANY entity that could be considered broadly relevant to the work. For example, if your article is about testing an epidermal growth factor receptor (EGFR) antagonist in lung cancer, you should report all associations with entities pursuing diagnostic or therapeutic strategies in cancer in general, not just in the area of EGFR or lung cancer.

Report all sources of revenue paid (or promised to be paid) directly to you or your institution on your behalf over the 36 months prior to submission of the work. This should include all monies from sources with relevance to the submitted work, not just monies from the entity that sponsored the research. Please note that your interactions with the work's sponsor that are outside the submitted work should also be listed here. If there is any question, it is usually better to disclose a relationship than not to do so.

For grants you have received for work outside the submitted work, you should disclose support ONLY from entities that could be perceived to be affected financially by the published work, such as drug companies, or foundations supported by entities that could be perceived to have a financial stake in the outcome. Public funding sources, such as government agencies, charitable foundations or academic institutions, need not be disclosed. For example, if a government agency sponsored a study in which you have been involved and drugs were provided by a pharmaceutical company, you need only list the pharmaceutical company.

#### 4. Other relationships.

Use this section to report other relationships or activities that readers could perceive to have influenced, or that give the appearance of potentially influencing, what you wrote in the submitted work.





## ICMJE Form for Disclosure of Potential Conflicts of Interest

### Section 1. Identifying Information

1. Given Name (First Name)  
Mark

2. Surname (Last Name)  
Wilcox

3. Effective Date (07-August-2008)  
31-August-2011

4. Are you the corresponding author?  Yes  No

5. Manuscript Title  
The longitudinal prevalence of MRSA in care home residents and the effectiveness of improving infection prevention knowledge and practice on colonisation

6. Manuscript Identifying Number (if you know it)  
BMJ.2011.000490

### Section 2. The Work Under Consideration for Publication

Did you or your institution at any time receive payment or services from a third party for any aspect of the submitted work (including but not limited to grants, data monitoring board, study design, manuscript preparation, statistical analysis, etc...)?

Complete each row by checking "No" or providing the requested information. **If you have more than one relationship click the "Add" button to add a row. Excess rows can be removed by clicking the "X" button.**

#### The Work Under Consideration for Publication

| Type                                                                                                                                    | No                                  | Money Paid to You        | Money to Your Institution*          | Name of Entity       | Comments** |     |
|-----------------------------------------------------------------------------------------------------------------------------------------|-------------------------------------|--------------------------|-------------------------------------|----------------------|------------|-----|
| 1. Grant                                                                                                                                | <input type="checkbox"/>            | <input type="checkbox"/> | <input checked="" type="checkbox"/> | Department of Health |            | X   |
|                                                                                                                                         |                                     |                          |                                     |                      |            | ADD |
| 2. Consulting fee or honorarium                                                                                                         | <input checked="" type="checkbox"/> | <input type="checkbox"/> | <input type="checkbox"/>            |                      |            | X   |
|                                                                                                                                         |                                     |                          |                                     |                      |            | ADD |
| 3. Support for travel to meetings for the study or other purposes                                                                       | <input checked="" type="checkbox"/> | <input type="checkbox"/> | <input type="checkbox"/>            |                      |            | X   |
|                                                                                                                                         |                                     |                          |                                     |                      |            | ADD |
| 4. Fees for participation in review activities such as data monitoring boards, statistical analysis, end point committees, and the like | <input checked="" type="checkbox"/> | <input type="checkbox"/> | <input type="checkbox"/>            |                      |            | X   |
|                                                                                                                                         |                                     |                          |                                     |                      |            | ADD |
| 5. Payment for writing or reviewing the manuscript                                                                                      | <input checked="" type="checkbox"/> | <input type="checkbox"/> | <input type="checkbox"/>            |                      |            | X   |
|                                                                                                                                         |                                     |                          |                                     |                      |            | ADD |
| 6. Provision of writing assistance, medicines, equipment, or administrative support                                                     | <input checked="" type="checkbox"/> | <input type="checkbox"/> | <input type="checkbox"/>            |                      |            | X   |

Wilcox

2



## ICMJE Form for Disclosure of Potential Conflicts of Interest

### The Work Under Consideration for Publication

| Type     | No                                  | Money Paid to You        | Money to Your Institution* | Name of Entity | Comments** |     |
|----------|-------------------------------------|--------------------------|----------------------------|----------------|------------|-----|
|          |                                     |                          |                            |                |            | ADD |
| 7. Other | <input checked="" type="checkbox"/> | <input type="checkbox"/> | <input type="checkbox"/>   |                |            | X   |
|          |                                     |                          |                            |                |            | ADD |

\* This means money that your institution received for your efforts on this study.

\*\* Use this section to provide any needed explanation.

### Section 3.

#### Relevant financial activities outside the submitted work.

Place a check in the appropriate boxes in the table to indicate whether you have financial relationships (regardless of amount of compensation) with entities as described in the instructions. Use one line for each entity; add as many lines as you need by clicking the "Add +" box. You should report relationships that were present during the 36 months prior to submission.

Complete each row by checking "No" or providing the requested information. **If you have more than one relationship click the "Add" button to add a row. Excess rows can be removed by clicking the "X" button.**

### Relevant financial activities outside the submitted work

| Type of Relationship (in alphabetical order)                  | No                                  | Money Paid to You        | Money to Your Institution* | Entity | Comments |     |
|---------------------------------------------------------------|-------------------------------------|--------------------------|----------------------------|--------|----------|-----|
| 1. Board membership                                           | <input checked="" type="checkbox"/> | <input type="checkbox"/> | <input type="checkbox"/>   |        |          | X   |
|                                                               |                                     |                          |                            |        |          | ADD |
| 2. Consultancy                                                | <input checked="" type="checkbox"/> | <input type="checkbox"/> | <input type="checkbox"/>   |        |          | X   |
|                                                               |                                     |                          |                            |        |          | ADD |
| 3. Employment                                                 | <input checked="" type="checkbox"/> | <input type="checkbox"/> | <input type="checkbox"/>   |        |          | X   |
|                                                               |                                     |                          |                            |        |          | ADD |
| 4. Expert testimony                                           | <input checked="" type="checkbox"/> | <input type="checkbox"/> | <input type="checkbox"/>   |        |          | X   |
|                                                               |                                     |                          |                            |        |          | ADD |
| 5. Grants/grants pending                                      | <input checked="" type="checkbox"/> | <input type="checkbox"/> | <input type="checkbox"/>   |        |          | X   |
|                                                               |                                     |                          |                            |        |          | ADD |
| 6. Payment for lectures including service on speakers bureaus | <input checked="" type="checkbox"/> | <input type="checkbox"/> | <input type="checkbox"/>   |        |          | X   |
|                                                               |                                     |                          |                            |        |          | ADD |
| 7. Payment for manuscript preparation                         | <input checked="" type="checkbox"/> | <input type="checkbox"/> | <input type="checkbox"/>   |        |          | X   |

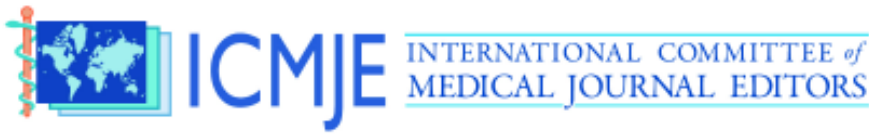

## ICMJE Form for Disclosure of Potential Conflicts of Interest

| Relevant financial activities outside the submitted work                    |                                     |                          |                            |        |          |     |
|-----------------------------------------------------------------------------|-------------------------------------|--------------------------|----------------------------|--------|----------|-----|
| Type of Relationship (in alphabetical order)                                | No                                  | Money Paid to You        | Money to Your Institution* | Entity | Comments |     |
|                                                                             |                                     |                          |                            |        |          | ADD |
| 8. Patents (planned, pending or issued)                                     | <input checked="" type="checkbox"/> | <input type="checkbox"/> | <input type="checkbox"/>   |        |          | X   |
|                                                                             |                                     |                          |                            |        |          | ADD |
| 9. Royalties                                                                | <input checked="" type="checkbox"/> | <input type="checkbox"/> | <input type="checkbox"/>   |        |          | X   |
|                                                                             |                                     |                          |                            |        |          | ADD |
| 10. Payment for development of educational presentations                    | <input checked="" type="checkbox"/> | <input type="checkbox"/> | <input type="checkbox"/>   |        |          | X   |
|                                                                             |                                     |                          |                            |        |          | ADD |
| 11. Stock/stock options                                                     | <input checked="" type="checkbox"/> | <input type="checkbox"/> | <input type="checkbox"/>   |        |          | X   |
|                                                                             |                                     |                          |                            |        |          | ADD |
| 12. Travel/accommodations/meeting expenses unrelated to activities listed** | <input checked="" type="checkbox"/> | <input type="checkbox"/> | <input type="checkbox"/>   |        |          | X   |
|                                                                             |                                     |                          |                            |        |          | ADD |
| 13. Other (err on the side of full disclosure)                              | <input checked="" type="checkbox"/> | <input type="checkbox"/> | <input type="checkbox"/>   |        |          | X   |
|                                                                             |                                     |                          |                            |        |          | ADD |

\* This means money that your institution received for your efforts.

\*\* For example, if you report a consultancy above there is no need to report travel related to that consultancy on this line.

### Section 4. Other relationships

Are there other relationships or activities that readers could perceive to have influenced, or that give the appearance of potentially influencing, what you wrote in the submitted work?

- No other relationships/conditions/circumstances that present a potential conflict of interest
- Yes, the following relationships/conditions/circumstances are present (explain below):

At the time of manuscript acceptance, journals will ask authors to confirm and, if necessary, update their disclosure statements. On occasion, journals may ask authors to disclose further information about reported relationships.

Hide All Table Rows Checked 'No'

SAVE

1  
2  
3  
4  
5  
6  
7  
8  
9  
10  
11  
12  
13  
14  
15  
16  
17  
18  
19  
20  
21  
22  
23  
24  
25  
26  
27  
28  
29  
30  
31  
32  
33  
34  
35  
36  
37  
38  
39  
40  
41  
42  
43  
44  
45  
46  
47  
48  
49  
50  
51  
52  
53  
54  
55  
56  
57  
58  
59  
60

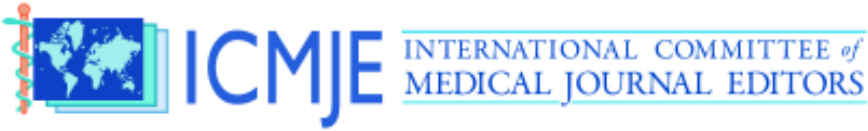

## ICMJE Form for Disclosure of Potential Conflicts of Interest

---

### Evaluation and Feedback

Please visit <http://www.icmje.org/cgi-bin/feedback> to provide feedback on your experience with completing this form.

For peer review only



## ICMJE Form for Disclosure of Potential Conflicts of Interest

### Instructions

The purpose of this form is to provide readers of your manuscript with information about your other interests that could influence how they receive and understand your work. The form is designed to be completed electronically and stored electronically. It contains programming that allows appropriate data display. Each author should submit a separate form and is responsible for the accuracy and completeness of the submitted information. The form is in four parts.

#### 1. Identifying information.

Enter your full name. If you are NOT the corresponding author please check the box "no" and a space to enter the name of the corresponding author in the space that appears. Provide the requested manuscript information. Double-check the manuscript number and enter it.

#### 2. The work under consideration for publication.

This section asks for information about the work that you have submitted for publication. The time frame for this reporting is that of the work itself, from the initial conception and planning to the present. The requested information is about resources that you received, either directly or indirectly (via your institution), to enable you to complete the work. Checking "No" means that you did the work without receiving any financial support from any third party -- that is, the work was supported by funds from the same institution that pays your salary and that institution did not receive third-party funds with which to pay you. If you or your institution received funds from a third party to support the work, such as a government granting agency, charitable foundation or commercial sponsor, check "Yes". Then complete the appropriate boxes to indicate the type of support and whether the payment went to you, or to your institution, or both.

#### 3. Relevant financial activities outside the submitted work.

This section asks about your financial relationships with entities in the bio-medical arena that could be perceived to influence, or that give the appearance of potentially influencing, what you wrote in the submitted work. You should disclose interactions with ANY entity that could be considered broadly relevant to the work. For example, if your article is about testing an epidermal growth factor receptor (EGFR) antagonist in lung cancer, you should report all associations with entities pursuing diagnostic or therapeutic strategies in cancer in general, not just in the area of EGFR or lung cancer.

Report all sources of revenue paid (or promised to be paid) directly to you or your institution on your behalf over the 36 months prior to submission of the work. This should include all monies from sources with relevance to the submitted work, not just monies from the entity that sponsored the research. Please note that your interactions with the work's sponsor that are outside the submitted work should also be listed here. If there is any question, it is usually better to disclose a relationship than not to do so.

For grants you have received for work outside the submitted work, you should disclose support ONLY from entities that could be perceived to be affected financially by the published work, such as drug companies, or foundations supported by entities that could be perceived to have a financial stake in the outcome. Public funding sources, such as government agencies, charitable foundations or academic institutions, need not be disclosed. For example, if a government agency sponsored a study in which you have been involved and drugs were provided by a pharmaceutical company, you need only list the pharmaceutical company.

#### 4. Other relationships.

Use this section to report other relationships or activities that readers could perceive to have influenced, or that give the appearance of potentially influencing, what you wrote in the submitted work.



## ICMJE Form for Disclosure of Potential Conflicts of Interest

### Section 1. Identifying Information

|                                                                                                                                                                                  |                                                                     |                                                      |
|----------------------------------------------------------------------------------------------------------------------------------------------------------------------------------|---------------------------------------------------------------------|------------------------------------------------------|
| 1. Given Name (First Name)<br>Benjamin                                                                                                                                           | 2. Surname (Last Name)<br>Barr                                      | 3. Effective Date (07-August-2008)<br>31-August-2011 |
| 4. Are you the corresponding author?                                                                                                                                             | <input type="checkbox"/> Yes <input checked="" type="checkbox"/> No | Corresponding Author's Name<br>PROFESSOR MARK WILCOX |
| 5. Manuscript Title<br>The longitudinal prevalence of MRSA in care home residents and the effectiveness of improving infection prevention knowledge and practice on colonisation |                                                                     |                                                      |
| 6. Manuscript Identifying Number (if you know it)<br>BMJ.2011.000490                                                                                                             |                                                                     |                                                      |

### Section 2. The Work Under Consideration for Publication

Did you or your institution at any time receive payment or services from a third party for any aspect of the submitted work (including but not limited to grants, data monitoring board, study design, manuscript preparation, statistical analysis, etc...)?

Complete each row by checking "No" or providing the requested information. **If you have more than one relationship click the "Add" button to add a row. Excess rows can be removed by clicking the "X" button.**

#### The Work Under Consideration for Publication

| Type                                                                                                                                    | No                                  | Money Paid to You        | Money to Your Institution*          | Name of Entity       | Comments** |          |
|-----------------------------------------------------------------------------------------------------------------------------------------|-------------------------------------|--------------------------|-------------------------------------|----------------------|------------|----------|
| 1. Grant                                                                                                                                | <input type="checkbox"/>            | <input type="checkbox"/> | <input checked="" type="checkbox"/> | Department of Health |            | X<br>ADD |
| 2. Consulting fee or honorarium                                                                                                         | <input checked="" type="checkbox"/> | <input type="checkbox"/> | <input type="checkbox"/>            |                      |            | X<br>ADD |
| 3. Support for travel to meetings for the study or other purposes                                                                       | <input checked="" type="checkbox"/> | <input type="checkbox"/> | <input type="checkbox"/>            |                      |            | X<br>ADD |
| 4. Fees for participation in review activities such as data monitoring boards, statistical analysis, end point committees, and the like | <input checked="" type="checkbox"/> | <input type="checkbox"/> | <input type="checkbox"/>            |                      |            | X<br>ADD |
| 5. Payment for writing or reviewing the manuscript                                                                                      | <input checked="" type="checkbox"/> | <input type="checkbox"/> | <input type="checkbox"/>            |                      |            | X<br>ADD |
| 6. Provision of writing assistance, medicines, equipment, or administrative support                                                     | <input checked="" type="checkbox"/> | <input type="checkbox"/> | <input type="checkbox"/>            |                      |            | X        |

Barr

2



## ICMJE Form for Disclosure of Potential Conflicts of Interest

| The Work Under Consideration for Publication |                                     |                          |                            |                |            |     |
|----------------------------------------------|-------------------------------------|--------------------------|----------------------------|----------------|------------|-----|
| Type                                         | No                                  | Money Paid to You        | Money to Your Institution* | Name of Entity | Comments** |     |
|                                              |                                     |                          |                            |                |            | ADD |
| 7. Other                                     | <input checked="" type="checkbox"/> | <input type="checkbox"/> | <input type="checkbox"/>   |                |            | X   |
|                                              |                                     |                          |                            |                |            | ADD |

\* This means money that your institution received for your efforts on this study.

\*\* Use this section to provide any needed explanation.

### Section 3.

#### Relevant financial activities outside the submitted work.

Place a check in the appropriate boxes in the table to indicate whether you have financial relationships (regardless of amount of compensation) with entities as described in the instructions. Use one line for each entity; add as many lines as you need by clicking the "Add +" box. You should report relationships that were present during the 36 months prior to submission.

Complete each row by checking "No" or providing the requested information. **If you have more than one relationship click the "Add" button to add a row. Excess rows can be removed by clicking the "X" button.**

| Relevant financial activities outside the submitted work      |                                     |                          |                            |        |          |     |
|---------------------------------------------------------------|-------------------------------------|--------------------------|----------------------------|--------|----------|-----|
| Type of Relationship (in alphabetical order)                  | No                                  | Money Paid to You        | Money to Your Institution* | Entity | Comments |     |
| 1. Board membership                                           | <input checked="" type="checkbox"/> | <input type="checkbox"/> | <input type="checkbox"/>   |        |          | X   |
|                                                               |                                     |                          |                            |        |          | ADD |
| 2. Consultancy                                                | <input checked="" type="checkbox"/> | <input type="checkbox"/> | <input type="checkbox"/>   |        |          | X   |
|                                                               |                                     |                          |                            |        |          | ADD |
| 3. Employment                                                 | <input checked="" type="checkbox"/> | <input type="checkbox"/> | <input type="checkbox"/>   |        |          | X   |
|                                                               |                                     |                          |                            |        |          | ADD |
| 4. Expert testimony                                           | <input checked="" type="checkbox"/> | <input type="checkbox"/> | <input type="checkbox"/>   |        |          | X   |
|                                                               |                                     |                          |                            |        |          | ADD |
| 5. Grants/grants pending                                      | <input checked="" type="checkbox"/> | <input type="checkbox"/> | <input type="checkbox"/>   |        |          | X   |
|                                                               |                                     |                          |                            |        |          | ADD |
| 6. Payment for lectures including service on speakers bureaus | <input checked="" type="checkbox"/> | <input type="checkbox"/> | <input type="checkbox"/>   |        |          | X   |
|                                                               |                                     |                          |                            |        |          | ADD |
| 7. Payment for manuscript preparation                         | <input checked="" type="checkbox"/> | <input type="checkbox"/> | <input type="checkbox"/>   |        |          | X   |



## ICMJE Form for Disclosure of Potential Conflicts of Interest

| Relevant financial activities outside the submitted work                    |                                     |                          |                            |        |          |     |
|-----------------------------------------------------------------------------|-------------------------------------|--------------------------|----------------------------|--------|----------|-----|
| Type of Relationship (in alphabetical order)                                | No                                  | Money Paid to You        | Money to Your Institution* | Entity | Comments |     |
|                                                                             |                                     |                          |                            |        |          | ADD |
| 8. Patents (planned, pending or issued)                                     | <input checked="" type="checkbox"/> | <input type="checkbox"/> | <input type="checkbox"/>   |        |          | X   |
|                                                                             |                                     |                          |                            |        |          | ADD |
| 9. Royalties                                                                | <input checked="" type="checkbox"/> | <input type="checkbox"/> | <input type="checkbox"/>   |        |          | X   |
|                                                                             |                                     |                          |                            |        |          | ADD |
| 10. Payment for development of educational presentations                    | <input checked="" type="checkbox"/> | <input type="checkbox"/> | <input type="checkbox"/>   |        |          | X   |
|                                                                             |                                     |                          |                            |        |          | ADD |
| 11. Stock/stock options                                                     | <input checked="" type="checkbox"/> | <input type="checkbox"/> | <input type="checkbox"/>   |        |          | X   |
|                                                                             |                                     |                          |                            |        |          | ADD |
| 12. Travel/accommodations/meeting expenses unrelated to activities listed** | <input checked="" type="checkbox"/> | <input type="checkbox"/> | <input type="checkbox"/>   |        |          | X   |
|                                                                             |                                     |                          |                            |        |          | ADD |
| 13. Other (err on the side of full disclosure)                              | <input checked="" type="checkbox"/> | <input type="checkbox"/> | <input type="checkbox"/>   |        |          | X   |
|                                                                             |                                     |                          |                            |        |          | ADD |

\* This means money that your institution received for your efforts.

\*\* For example, if you report a consultancy above there is no need to report travel related to that consultancy on this line.

### Section 4. Other relationships

Are there other relationships or activities that readers could perceive to have influenced, or that give the appearance of potentially influencing, what you wrote in the submitted work?

- No other relationships/conditions/circumstances that present a potential conflict of interest
- Yes, the following relationships/conditions/circumstances are present (explain below):

At the time of manuscript acceptance, journals will ask authors to confirm and, if necessary, update their disclosure statements. On occasion, journals may ask authors to disclose further information about reported relationships.

Hide All Table Rows Checked 'No'

SAVE



1  
2  
3  
4  
5  
6  
7  
8  
9  
10  
11  
12  
13  
14  
15  
16  
17  
18  
19  
20  
21  
22  
23  
24  
25  
26  
27  
28  
29  
30  
31  
32  
33  
34  
35  
36  
37  
38  
39  
40  
41  
42  
43  
44  
45  
46  
47  
48  
49  
50  
51  
52  
53  
54  
55  
56  
57  
58  
59  
60

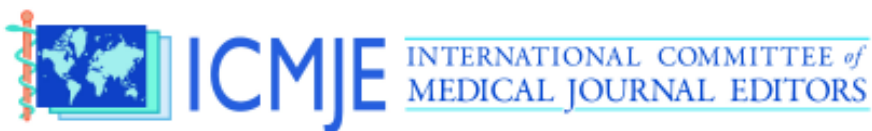

## ICMJE Form for Disclosure of Potential Conflicts of Interest

---

### Evaluation and Feedback

Please visit <http://www.icmje.org/cgi-bin/feedback> to provide feedback on your experience with completing this form.

For peer review only



## ICMJE Form for Disclosure of Potential Conflicts of Interest

### Instructions

The purpose of this form is to provide readers of your manuscript with information about your other interests that could influence how they receive and understand your work. The form is designed to be completed electronically and stored electronically. It contains programming that allows appropriate data display. Each author should submit a separate form and is responsible for the accuracy and completeness of the submitted information. The form is in four parts.

#### 1. Identifying information.

Enter your full name. If you are NOT the corresponding author please check the box "no" and a space to enter the name of the corresponding author in the space that appears. Provide the requested manuscript information. Double-check the manuscript number and enter it.

#### 2. The work under consideration for publication.

This section asks for information about the work that you have submitted for publication. The time frame for this reporting is that of the work itself, from the initial conception and planning to the present. The requested information is about resources that you received, either directly or indirectly (via your institution), to enable you to complete the work. Checking "No" means that you did the work without receiving any financial support from any third party -- that is, the work was supported by funds from the same institution that pays your salary and that institution did not receive third-party funds with which to pay you. If you or your institution received funds from a third party to support the work, such as a government granting agency, charitable foundation or commercial sponsor, check "Yes". Then complete the appropriate boxes to indicate the type of support and whether the payment went to you, or to your institution, or both.

#### 3. Relevant financial activities outside the submitted work.

This section asks about your financial relationships with entities in the bio-medical arena that could be perceived to influence, or that give the appearance of potentially influencing, what you wrote in the submitted work. You should disclose interactions with ANY entity that could be considered broadly relevant to the work. For example, if your article is about testing an epidermal growth factor receptor (EGFR) antagonist in lung cancer, you should report all associations with entities pursuing diagnostic or therapeutic strategies in cancer in general, not just in the area of EGFR or lung cancer.

Report all sources of revenue paid (or promised to be paid) directly to you or your institution on your behalf over the 36 months prior to submission of the work. This should include all monies from sources with relevance to the submitted work, not just monies from the entity that sponsored the research. Please note that your interactions with the work's sponsor that are outside the submitted work should also be listed here. If there is any question, it is usually better to disclose a relationship than not to do so.

For grants you have received for work outside the submitted work, you should disclose support ONLY from entities that could be perceived to be affected financially by the published work, such as drug companies, or foundations supported by entities that could be perceived to have a financial stake in the outcome. Public funding sources, such as government agencies, charitable foundations or academic institutions, need not be disclosed. For example, if a government agency sponsored a study in which you have been involved and drugs were provided by a pharmaceutical company, you need only list the pharmaceutical company.

#### 4. Other relationships.

Use this section to report other relationships or activities that readers could perceive to have influenced, or that give the appearance of potentially influencing, what you wrote in the submitted work.



## ICMJE Form for Disclosure of Potential Conflicts of Interest

### Section 1. Identifying Information

1. Given Name (First Name)  2. Surname (Last Name)  3. Effective Date (07-August-2008)

4. Are you the corresponding author?  Yes  No Corresponding Author's Name

5. Manuscript Title

6. Manuscript Identifying Number (if you know it)

### Section 2. The Work Under Consideration for Publication

Did you or your institution at any time receive payment or services from a third party for any aspect of the submitted work (including but not limited to grants, data monitoring board, study design, manuscript preparation, statistical analysis, etc...)?

Complete each row by checking "No" or providing the requested information. **If you have more than one relationship click the "Add" button to add a row. Excess rows can be removed by clicking the "X" button.**

#### The Work Under Consideration for Publication

| Type                                                                                                                                    | No                                  | Money Paid to You        | Money to Your Institution*          | Name of Entity       | Comments** |     |
|-----------------------------------------------------------------------------------------------------------------------------------------|-------------------------------------|--------------------------|-------------------------------------|----------------------|------------|-----|
| 1. Grant                                                                                                                                | <input type="checkbox"/>            | <input type="checkbox"/> | <input checked="" type="checkbox"/> | Department of Health |            | X   |
|                                                                                                                                         |                                     |                          |                                     |                      |            | ADD |
| 2. Consulting fee or honorarium                                                                                                         | <input checked="" type="checkbox"/> | <input type="checkbox"/> | <input type="checkbox"/>            |                      |            | X   |
|                                                                                                                                         |                                     |                          |                                     |                      |            | ADD |
| 3. Support for travel to meetings for the study or other purposes                                                                       | <input checked="" type="checkbox"/> | <input type="checkbox"/> | <input type="checkbox"/>            |                      |            | X   |
|                                                                                                                                         |                                     |                          |                                     |                      |            | ADD |
| 4. Fees for participation in review activities such as data monitoring boards, statistical analysis, end point committees, and the like | <input checked="" type="checkbox"/> | <input type="checkbox"/> | <input type="checkbox"/>            |                      |            | X   |
|                                                                                                                                         |                                     |                          |                                     |                      |            | ADD |
| 5. Payment for writing or reviewing the manuscript                                                                                      | <input checked="" type="checkbox"/> | <input type="checkbox"/> | <input type="checkbox"/>            |                      |            | X   |
|                                                                                                                                         |                                     |                          |                                     |                      |            | ADD |
| 6. Provision of writing assistance, medicines, equipment, or administrative support                                                     | <input checked="" type="checkbox"/> | <input type="checkbox"/> | <input type="checkbox"/>            |                      |            | X   |

Parnell

2



## ICMJE Form for Disclosure of Potential Conflicts of Interest

### The Work Under Consideration for Publication

| Type     | No                                  | Money Paid to You        | Money to Your Institution* | Name of Entity | Comments** |     |
|----------|-------------------------------------|--------------------------|----------------------------|----------------|------------|-----|
|          |                                     |                          |                            |                |            | ADD |
| 7. Other | <input checked="" type="checkbox"/> | <input type="checkbox"/> | <input type="checkbox"/>   |                |            | X   |
|          |                                     |                          |                            |                |            | ADD |

\* This means money that your institution received for your efforts on this study.

\*\* Use this section to provide any needed explanation.

### Section 3.

#### Relevant financial activities outside the submitted work.

Place a check in the appropriate boxes in the table to indicate whether you have financial relationships (regardless of amount of compensation) with entities as described in the instructions. Use one line for each entity; add as many lines as you need by clicking the "Add +" box. You should report relationships that were present during the 36 months prior to submission.

Complete each row by checking "No" or providing the requested information. **If you have more than one relationship click the "Add" button to add a row. Excess rows can be removed by clicking the "X" button.**

### Relevant financial activities outside the submitted work

| Type of Relationship (in alphabetical order)                  | No                                  | Money Paid to You        | Money to Your Institution* | Entity | Comments |     |
|---------------------------------------------------------------|-------------------------------------|--------------------------|----------------------------|--------|----------|-----|
| 1. Board membership                                           | <input checked="" type="checkbox"/> | <input type="checkbox"/> | <input type="checkbox"/>   |        |          | X   |
|                                                               |                                     |                          |                            |        |          | ADD |
| 2. Consultancy                                                | <input checked="" type="checkbox"/> | <input type="checkbox"/> | <input type="checkbox"/>   |        |          | X   |
|                                                               |                                     |                          |                            |        |          | ADD |
| 3. Employment                                                 | <input checked="" type="checkbox"/> | <input type="checkbox"/> | <input type="checkbox"/>   |        |          | X   |
|                                                               |                                     |                          |                            |        |          | ADD |
| 4. Expert testimony                                           | <input checked="" type="checkbox"/> | <input type="checkbox"/> | <input type="checkbox"/>   |        |          | X   |
|                                                               |                                     |                          |                            |        |          | ADD |
| 5. Grants/grants pending                                      | <input checked="" type="checkbox"/> | <input type="checkbox"/> | <input type="checkbox"/>   |        |          | X   |
|                                                               |                                     |                          |                            |        |          | ADD |
| 6. Payment for lectures including service on speakers bureaus | <input checked="" type="checkbox"/> | <input type="checkbox"/> | <input type="checkbox"/>   |        |          | X   |
|                                                               |                                     |                          |                            |        |          | ADD |
| 7. Payment for manuscript preparation                         | <input checked="" type="checkbox"/> | <input type="checkbox"/> | <input type="checkbox"/>   |        |          | X   |



## ICMJE Form for Disclosure of Potential Conflicts of Interest

| Relevant financial activities outside the submitted work                    |                                     |                          |                            |        |          |     |
|-----------------------------------------------------------------------------|-------------------------------------|--------------------------|----------------------------|--------|----------|-----|
| Type of Relationship (in alphabetical order)                                | No                                  | Money Paid to You        | Money to Your Institution* | Entity | Comments |     |
|                                                                             |                                     |                          |                            |        |          | ADD |
| 8. Patents (planned, pending or issued)                                     | <input checked="" type="checkbox"/> | <input type="checkbox"/> | <input type="checkbox"/>   |        |          | X   |
|                                                                             |                                     |                          |                            |        |          | ADD |
| 9. Royalties                                                                | <input checked="" type="checkbox"/> | <input type="checkbox"/> | <input type="checkbox"/>   |        |          | X   |
|                                                                             |                                     |                          |                            |        |          | ADD |
| 10. Payment for development of educational presentations                    | <input checked="" type="checkbox"/> | <input type="checkbox"/> | <input type="checkbox"/>   |        |          | X   |
|                                                                             |                                     |                          |                            |        |          | ADD |
| 11. Stock/stock options                                                     | <input checked="" type="checkbox"/> | <input type="checkbox"/> | <input type="checkbox"/>   |        |          | X   |
|                                                                             |                                     |                          |                            |        |          | ADD |
| 12. Travel/accommodations/meeting expenses unrelated to activities listed** | <input checked="" type="checkbox"/> | <input type="checkbox"/> | <input type="checkbox"/>   |        |          | X   |
|                                                                             |                                     |                          |                            |        |          | ADD |
| 13. Other (err on the side of full disclosure)                              | <input checked="" type="checkbox"/> | <input type="checkbox"/> | <input type="checkbox"/>   |        |          | X   |
|                                                                             |                                     |                          |                            |        |          | ADD |

\* This means money that your institution received for your efforts.

\*\* For example, if you report a consultancy above there is no need to report travel related to that consultancy on this line.

### Section 4. Other relationships

Are there other relationships or activities that readers could perceive to have influenced, or that give the appearance of potentially influencing, what you wrote in the submitted work?

- No other relationships/conditions/circumstances that present a potential conflict of interest
- Yes, the following relationships/conditions/circumstances are present (explain below):

At the time of manuscript acceptance, journals will ask authors to confirm and, if necessary, update their disclosure statements. On occasion, journals may ask authors to disclose further information about reported relationships.

Hide All Table Rows Checked 'No'

SAVE

1  
2  
3  
4  
5  
6  
7  
8  
9  
10  
11  
12  
13  
14  
15  
16  
17  
18  
19  
20  
21  
22  
23  
24  
25  
26  
27  
28  
29  
30  
31  
32  
33  
34  
35  
36  
37  
38  
39  
40  
41  
42  
43  
44  
45  
46  
47  
48  
49  
50  
51  
52  
53  
54  
55  
56  
57  
58  
59  
60



## ICMJE Form for Disclosure of Potential Conflicts of Interest

---

### Evaluation and Feedback

Please visit <http://www.icmje.org/cgi-bin/feedback> to provide feedback on your experience with completing this form.

For peer review only
